# Supplementary material
Source: publisher figshare collection journal article supplement (https://acs.figshare.com/ndownloader/files/24159649)
Supplement: Supplementary file 1 [file 24159649]

# Total Synthesis of (+)-Raputindole A: An Iridium-catalyzed Cyclization Approach

Juliana L. L. F. Regueira<sup>ψ,†</sup>, Luiz F. Silva Jr<sup>ψ,#</sup>, Ronaldo A. Pilli<sup>\*,†</sup>

<sup>ψ</sup>Institute of Chemistry, University of São Paulo (USP), 05508-000 São Paulo, Brazil. <sup>†</sup>Institute of Chemistry, University of Campinas, 13083-970 Campinas, São Paulo, Brazil.

## Supporting Information

## Table of Contents

|                            |      |
|----------------------------|------|
| General Experimental ..... | SI2  |
| Synthetic procedures ..... | SI3  |
| References .....           | SI22 |
| NMR Spectra .....          | SI23 |

## General Experimental

All the solvents were kept under a nitrogen atmosphere. Dimethylformamide (DMF) and TMEDA were distilled after 12 hours under 4 Å molecular sieves. Tetrahydrofuran (THF) was distilled under sodium-benzophenone immediately prior to use.<sup>1</sup> Dichloroethane (DCE), dichloromethane (DCM) and trimethylamine (Et<sub>3</sub>N) were distilled from calcium hydride under a nitrogen atmosphere prior to use. The other anhydrous solvents were used without further purification, unless otherwise specified. The commercial reagents were used without further purification, unless otherwise stated. Oven-dried syringes were used to transfer the anhydrous solvents. The progress of the reactions was monitored by thin chromatography (TLC) using 0.25 mm E. Merck silica plates 60-F254 or neutral alumina. The visualizing agents were UV light (254 nm), *p*-anisaldehyde, curcumin and/or phosphomolybdic acid stain solutions and heat as developing agents. The purifications of the crude reaction mixtures were carried out using flash silica gel chromatography (Merck, 40-63 µm) under positive pressure. NMR spectra were recorded on Bruker AIII 300 or 500 MHz, Varian Gemini 400 MHz and Bruker AIII 800 MHz equipped with cryoprobe. Chemical shifts (δ) are in parts per million (ppm) and the calibration was performed with reference to residual non-deuterated solvent (CHCl<sub>3</sub> <sup>1</sup>H NMR δ 7.26 ppm, <sup>13</sup>C NMR 77.0 ppm). The following descriptors were used to describe the NMR data: chemical shift (ppm), multiplicity (br = broad, s = singlet, d = doublet, t = triplet, q = quartet, m = multiplet), coupling constant (Hertz) and integration. Infrared spectra were recorded on a Thermo Scientific iD3 spectrometer. High resolution mass spectra (HRMS) were recorded in a MicroToF Bruker Daltonics and in an Agilent Technologies 6530 Accurate-Mass Q-TOF LC-MS. The specific optical rotations were measured on a Perkin Elmer 341 polarimeter (sodium line = 589.3 nm).

## Synthetic procedures

### Methyl 5-bromo-1-tosyl-1*H*-indole-6-carboxylate (**8b**)

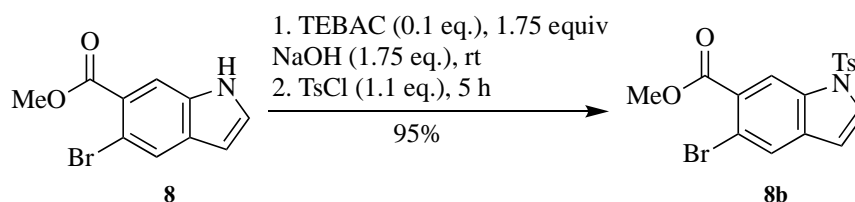

To a soln. of indole **8** (1.00 g, 3.94 mmol, 1.0 eq.) in DCM (150 mL) was added TEBAC (0.092 g, 0.39 mmol, 0.1 eq.). Then NaOH (0.276 g, 6.89 mmol, 1.75 eq.) and TsCl (0.826 g, 4.33 mmol, 1.1 eq.) were successively added. The reaction flask was stirred at room temperature for 5 hours. The reaction mixture was quenched with H<sub>2</sub>O (50 mL) and 1 M hydrochloric acid (30 mL) and the resulting mixture was stirred for 10 min. The aqueous layer was separated and extracted with 3% methanol/chloroform soln. (3 x 100 mL). The combined organic layer was washed with brine, dried over MgSO<sub>4</sub> and evaporated under reduced pressure. The resulting residue was purified by flash column chromatography (SiO<sub>2</sub>, 10-20% AcOEt/hexanes) to provide **8b** in 95% yield (1.53 g, 3.75 mmol) as a white solid.

**<sup>1</sup>H NMR (800 MHz, CDCl<sub>3</sub>):**  $\delta$  8.46 (s, 1 H); 7.81 (s, 1 H); 7.76 (d,  $J$  = 8.0 Hz; 2 H); 7.67 (d,  $J$  = 4.0 Hz; 1 H); 7.25 (d,  $J$  = 8.0 Hz; 2 H); 6.61 (dd,  $J$  = 0.8 and 3.2 Hz; 1 H); 3.98 (s, 3 H); 2.36 (s, 3 H).

**<sup>13</sup>C NMR (200 MHz, CDCl<sub>3</sub>):**  $\delta$  166.7; 145.6; 134.8; 134.3; 133.1; 130.2; 130.0; 127.6; 126.8; 126.7; 116.6; 115.6; 108.0; 52.7; 21.6.

**IR (cm<sup>-1</sup>)** 1727; 1593; 1452; 1425; 1403; 1374; 1279; 1222; 1169; 1101; 1010; 982; 930; 889; 864; 815; 768; 727; 708.

**HRMS (ESI)  $m/z$  [M+H]<sup>+</sup>** Calcd for C<sub>17</sub>H<sub>15</sub>NO<sub>4</sub>SBr 407.9905; Found 407.9887.

**Mp:** 155.0-155.8 °C.

### (5-Bromo-1-tosyl-1*H*-indol-6-yl)methanol (**10**)

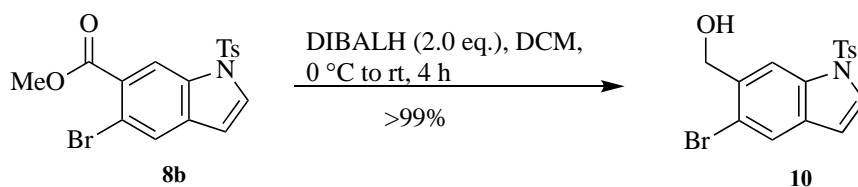

To a flame dried Schlenk flask was added **8b** (0.520 g, 1.28 mmol, 1.0 eq.) and DCM (10 mL). The soln. was cooled to 0 °C and then DIBALH (1M in toluene, 2.54 mL, 2.54 mmol, 2.0 eq.) was slowly added. The reaction mixture was stirred for 1 hour and the temperature was let to reach room temperature. After 3 hours, the reaction was completed by TLC and the reaction temperature was decreased to 0 °C. AcOEt (8 mL) was slowly added, followed by the addition of Rochelle's salt soln. (1M soln., 8 mL, 8 mmol) and Et<sub>2</sub>O (40 mL). The reaction mixture was stirred overnight and then the aqueous layer was separated and extracted with 3% MeOH in chloroform soln. (3 x 15 mL). The combined organic layer was washed with brine, dried (MgSO<sub>4</sub>) and the solvent was removed under reduced pressure. The product **10** was obtained in >99% yield (0.484 g, 1.27 mmol) as a white solid.

**<sup>1</sup>H NMR (300MHz, CDCl<sub>3</sub>)** δ 8.10 (s, 1H); 7.77 (s, 1H); 7.73 (d, J = 9.0 Hz, 2H), 7.57 (d, J = 6.0 Hz, 1H); 7.24 (d, J = 9.0 Hz, 2H); 6.59 (dd, J = 0.3 and 3.6 Hz, 1H); 4.83 (s, 2H); 2.35 (s, 3H).

**<sup>13</sup>C NMR (126 MHz, d6-(CD<sub>3</sub>)<sub>2</sub>CO):** δ 146.3, 138.0, 135.7, 135.0, 131.8, 130.7, 128.4, 127.5, 125.2, 116.7, 113.4, 108.9, 64.3, 21.2.

**HRMS (ESI) *m/z* [M-H<sub>2</sub>O+ H]<sup>+</sup>** Calcd for C<sub>16</sub>H<sub>12</sub>NO<sub>2</sub>SBr 361.9850; Found= 361.9863.

**Mp:** 136,7 – 139,2 °C.

**IR (cm<sup>-1</sup>):** 1411; 1367; 1164; 1123; 1057; 812; 688.

### 5-Bromo-1-tosyl-1H-indole-6-carbaldehyde (**11**)

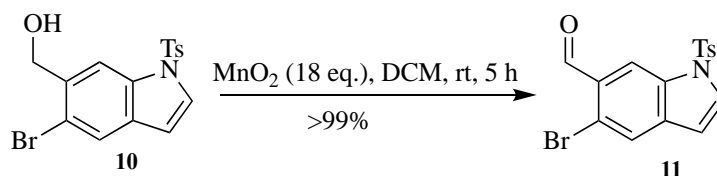

In a round bottom flask was added a solution of **10** (1.164 g, 3.063 mmol, 1.0 eq.) in DCM (100 mL). MnO<sub>2</sub> (5.205 g, 55.10 mmol, 18 eq.) was then added and the mixture was stirred for at rt 5 h. The suspension was filtered in a Celite pad and washed with AcOEt (400 mL) After

evaporation under reduced pressure, aldehyde **11** was obtained in >99% yield (1.15 g, 3.06 mmol) as an off-white solid.

**<sup>1</sup>H NMR (300MHz, CDCl<sub>3</sub>):** δ 10.42 (s, 1 H); 8.53 (s, 1 H); 7.82-7.76 (m, 4 H); 7.27 (m, 1 H); 7.25 (m, 1 H); 6.64-6.63 (dd, *J*=0.87 and 3.7 Hz; 1 H); 2.35 (s, 3 H).

**<sup>13</sup>C NMR (75 MHz, CDCl<sub>3</sub>):** δ 191.7, 145.7, 136.5, 134.6, 133.6, 131.3, 130.2, 129.2, 127.0, 125.9, 120.5, 115.1, 107.7, 21.6.

**IR (cm<sup>-1</sup>):** 1686, 1598, 1417, 1276, 1167, 1090, 815, 765, 664.

**Mp** = 191.0 – 191.3 °C

**HRMS (ESI-TOF) *m/z* [M+H]<sup>+</sup>** Calcd for C<sub>16</sub>H<sub>13</sub>NO<sub>3</sub>SBr 377.9799; Found 377.9779.

**5-(4,4,5,5-Tetramethyl-1,3,2-dioxaborolan-2-yl)-1-tosyl-1*H*-indole-6-carbaldehyde (**12**)**

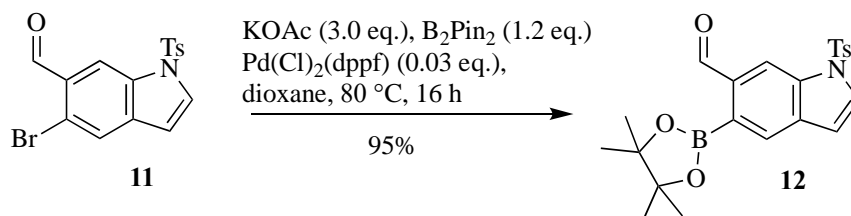

In a Schlenk flask charged with aldehyde **11** (1.014 g, 2.69 mmol, 1.0 eq.), bis(pinacolato)diboron (0.842 g, 3.22 mmol, 1.2 eq.), KOAc (0.790 g, 8.04 mmol, 3.0 eq.) and Pd(Cl)<sub>2</sub>(dppf) (0.059 g, 0.080 mmol, 0.03 eq.) under nitrogen atmosphere was added degassed dioxane (36 mL). The reaction mixture was stirred at 80 °C using an oil bath for 16 hours. After this time, the reaction mixture was cooled to rt and the crude mixture was filtered in a Celite/SiO<sub>2</sub> pad and washed with AcOEt (300 mL). The solvent was removed under reduced pressure and the crude product was purified by flash column chromatography (SiO<sub>2</sub>, 10-20% AcOEt/hexanes) to provide **12** in 95% yield (1.05 g, 2.55 mmol) as an off-white thick oil.

**<sup>1</sup>H NMR (400MHz, CDCl<sub>3</sub>):** δ 10.57 (s, 1 H); 8.56 (t, *J* = 0.8 and 1.2 Hz, 1 H); 8.02 (s, 1 H); 7.78 (d, *J* = 8.4 Hz; 2 H); 7.74 (d, *J* = 3.6 Hz; 1 H); 7.22 (d, *J* = 8.4 Hz, 2 H); 6.71 (dd, *J* = 1.2 and 3.6 Hz; 1 H); 2.32 (s, 3 H); 1.39 (s, 12 H).

**<sup>13</sup>C NMR (75 MHz, CDCl<sub>3</sub>):** δ 194.0, 145.4, 137.8, 135.7, 134.8, 134.4, 130.0, 130.0, 129.0, 126.8, 114.0, 108.9, 84.3, 25.0, 24.8, 21.5.

**HRMS (ESI)  $m/z$ [M+H]<sup>+</sup>** Calcd for C<sub>22</sub>H<sub>25</sub>BNO<sub>5</sub>S<sup>+</sup> 426.1541; Found 426.1570.

**IR (cm<sup>-1</sup>):** 2978, 1680, 1477, 1455, 1414, 1373, 1331, 1279, 1169, 1120, 974, 853, 675.

**(6-Formyl-1-tosyl-1*H*-indol-5-yl)boronic acid (7)**

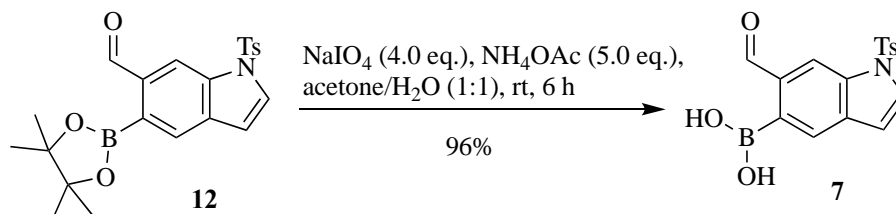

In a round bottom flask was added the aldehyde **12** (0.165 g, 0.388 mmol, 1.0 eq.) dissolved in acetone/H<sub>2</sub>O (1:1, v/v,) 8 mL). NaIO<sub>4</sub> (0.333 g, 1.56 mmol, 4.0 eq.) and NH<sub>4</sub>OAc (0.150 g, 1.94 mmol, 5.0 eq.) were added and the reaction mixture was stirred 6 h at rt. The solvent was removed under reduced pressure and the product was extracted using a mixture of 5% MeOH/DCM (3 x 10 mL). The combined organic layer was washed with brine, dried over Na<sub>2</sub>SO<sub>4</sub> and the solvent was reduced under reduced pressure to provide **7** in 96% yield as an orange solid (0.128 g, 0.373 mmol).

**<sup>1</sup>H NMR (300 MHz, CDCl<sub>3</sub>):** δ 9.97 (s, 1H); 8.54 (s, 1H); 8.50 (s, 1H); 7.82 (m, 2H); 7.78 (s, 1H); 7.28 (m, 1 H); 7.18 (s, 1H); 6.81 (m, 1H); 2.37 (s, 3H).

**<sup>13</sup>C NMR (75 MHz, d<sub>6</sub>-(CD<sub>3</sub>)<sub>2</sub>CO):** δ 196.9, 147.6, 138.6, 136.4, 136.5, 136.3, 132.2, 131.9, 130.4, 128.7, 128.6, 120.3, 111.0, 22.2.

**HRMS (ESI)  $m/z$  [M-H<sub>2</sub>O]<sup>-</sup>** Calcd for C<sub>16</sub>H<sub>13</sub>BNO<sub>5</sub>S 326.0658; Found 326.0655.

**Mp** = 135-139 °C.

**(5*R*,7*R*) and (5*S*,7*S*)-5-Methyl-1-tosyl-5-vinyl-1,5,6,7-tetrahydrocyclopenta[*f*]indol-7-ol ((+/-)-6)**

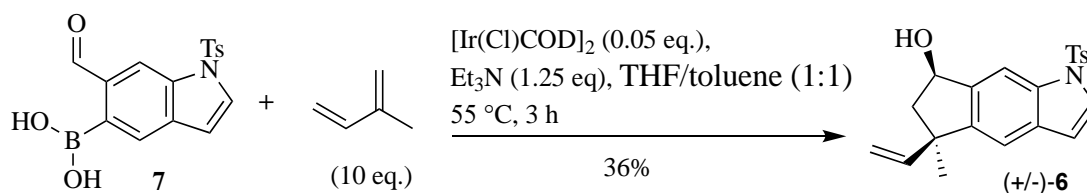

A resealable pressured tube equipped with a magnetic stir bar was charged with  $[\text{Ir}(\text{Cl})(\text{COD})]_2$  (0.001 g, 0.001 mmol, 0.05 eq.) and degassed toluene (0.3 mL).  $\text{Et}_3\text{N}$  (0.0050 mL, 0.036 mmol, 1.25 eq.) and isoprene (0.030 mL, 0.29 mmol, 10 eq.) were next added by a syringe. In another vessel, a solution of aldehyde **7** (0.010 g, 0.029 mmol, 1.0 eq.) in THF/toluene (0.7 mL, 5:2 v/v) which was cannulated to the resealable tube and the reaction mixture was protect from visible light and the temperature was increased to 55 °C using a heating block. After 3 h (monitored by  $^1\text{H}$  NMR) the reaction mixture was allowed to cool to rt and it was concentrated under reduced pressure. The resulting brown mixture was purified by flash column chromatography ( $\text{SiO}_2$ , 10-20% EtOAc/hexanes) to provide indole (+/-)-**6** in 36% yield (0.0038 g, 0.010 mmol) as a yellow solid.

**$^1\text{H}$  NMR (300 MHz,  $\text{CDCl}_3$ ):**  $\delta$  8.01 (m, 1H), 7.81 (m, 2H), 7.57 (d,  $J$  = 6.0 Hz, 1H), 7.24 (m, 2H), 7.22 (m, 1H), 6.61 (dd,  $J$  = 1.5 and 6.0 Hz, 1H), 6.17 (m, 1H), 5.33 (m, 1H), 5.04 (m, 2H), 2.43 (m, 1H), 2.34 (s, 3H), 2.15 (m, 1H), 1.61 (brs, 1H), 1.32 (m, 3H).

**$^{13}\text{C}$  NMR (126 MHz,  $\text{CDCl}_3$ ):**  $\delta$  147.5, 144.9, 144.7, 141.7, 135.4, 134.5, 131.7, 129.9, 126.9, 126.8, 116.1, 111.7, 109.5, 108.8, 74.6, 51.0, 47.9, 26.3, 21.6.

**HRMS (ESI)  $m/z$ [ $\text{M}+\text{Na}$ ] $^+$**  Calcd for  $\text{C}_{21}\text{H}_{21}\text{NO}_3\text{SNa}$  390.1134; Found 390.1150.

**Mp** = 84.1 – 89.9 °C.

**IV ( $\text{cm}^{-1}$ )** = 2359, 2343, 1372, 1167, 1109, 703, 668.

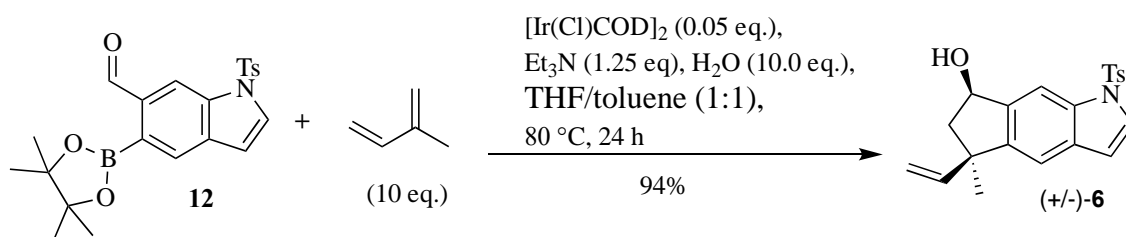

A resealable pressure tube equipped with a magnetic stir bar was charged with  $[\text{Ir}(\text{Cl})(\text{COD})]_2$  (0.012 g, 0.017 mmol, 0.05 eq.) and degassed toluene (0.7 mL).<sup>2</sup>  $\text{Et}_3\text{N}$  (0.060 mL, 0.42 mmol, 1.5 eq.) and isoprene (0.340 mL, 3.34 mmol, 10.0 eq.) were next added via syringe. In another vessel, a solution of pinacol ester **12** (0.142 g, 0.334 mmol, 1.0 eq.) in THF/toluene (3.5 mL, 3:2 v/v) was prepared and cannulated to the resealable reaction tube. Degassed  $\text{H}_2\text{O}$  (0.060 mL, 3.3 mmol) was added. The reaction flask was protected from visible light and the reaction temperature was increased to 80 °C using a heating block. After 24 hours (monitored by  $^1\text{H}$

NMR) the reaction mixture was allowed to cool to rt and concentrated under reduced pressure. The resulting brown mixture was purified by flash column chromatography (SiO<sub>2</sub>, 10-20% EtOAc/hexanes) to provide indole (+/-)-**6** in 94% yield (0.116 g, 0.315 mmol) as a yellow solid.

**(5*R*,7*R*) and (5*S*,7*S*)-5-Methyl-1-tosyl-5-vinyl-1,5,6,7-tetrahydrocyclopenta[*f*]indol-7-yl acetate ((+/-)-**13**)**

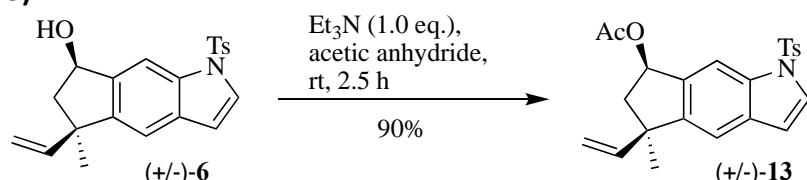

To a solution of indole (+/-)-**6** (0.020 g, 0.054 mmol, 1.0 eq.) in acetic anhydride (1.0 mL) in a round-bottom flask was added Et<sub>3</sub>N (0.0080 mL, 0.054 mmol, 1.0 eq.). After 2.5 h of stirring, the mixture was diluted with diethyl ether (3 mL) and washed with saturated NaHCO<sub>3</sub> (2 x 3 mL). The organic layer was dried over MgSO<sub>4</sub> and the solvent was removed under reduced pressure to provide (+/-)-**13** as a yellow oil (0.020 g; 0.049 mmol) in 90% yield.<sup>4</sup>

<sup>1</sup>H NMR (500 MHz, CDCl<sub>3</sub>): δ 7.97 (s, 1H), 7.81 (d, *J* = 8.5 Hz, 2H), 7.58 (d, *J* = 3.5 Hz, 1H), 7.27 (m, 3H), 6.62 (dd, *J* = 0.5, 3.5 Hz, 1H), 6.31 (m, 1H), 6.12 (m, 1H), 5.08 (m, 2H), 2.50 (m, 1H), 2.37 (s, 3H), 2.24 (s, 1H), 2.13 (s, 3H) 1.38 (s, 3H).

<sup>13</sup>C NMR (126 MHz, CDCl<sub>3</sub>) δ (ppm): 166.38, 146.2, 145.8, 144.9, 137.3, 135.3, 134.3, 132.2, 129.9, 127.1, 127.0, 115.9, 111.2, 110.4, 108.7, 76.4, 48.1, 47.5, 26.3, 22.2, 21.4.

**(5*R*,7*R*)-5-Methyl-1-tosyl-5-vinyl-1,5,6,7-tetrahydrocyclopenta[*f*]indol-7-ol ((*R*,*R*)-**6**) and (5*S*,7*S*)-5-methyl-1-tosyl-5-vinyl-1,5,6,7-tetrahydrocyclopenta[*f*]indol-7-yl acetate ((*S*,*S*)-**13**)**

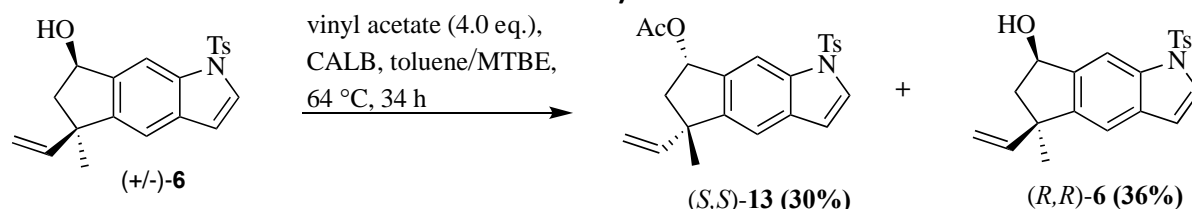

Table 1. Optimization of enzymatic resolution.

| Entry | Solvent | CALB (eq.) | Time (h) | Conversion | <i>e.e.</i> |
|-------|---------|------------|----------|------------|-------------|
|-------|---------|------------|----------|------------|-------------|



|   |                    |     |    |                         |      |
|---|--------------------|-----|----|-------------------------|------|
|   |                    |     |    |                         |      |
| 1 | Toluene            | 1.2 | 17 | 25                      | >99% |
| 2 | Toluene:MTBE (4:1) | 1.2 | 17 | 37.5                    | >99% |
| 3 | Toluene:MTBE (4:1) | 1.2 | 34 | 47.5                    | >99% |
| 4 | Toluene:MTBE (4:1) | 2.0 | 17 | 40                      | >99% |
| 5 | Toluene:MTBE (4:1) | 2.0 | 34 | 50                      | >99% |
| 6 | Toluene:MTBE (4:1) | 2.0 | 34 | 50 (30/36) <sup>a</sup> | >99% |

<sup>a</sup> yields of (*S,S*)-**13**/*(R,R)*-**6**.

To a magnetically stirred solution of alcohol (+/-)-**6** (0.080 g, 0.22 mmol, 1.0 eq.) in a toluene/MTBE mixture (6.40 mL, 8:2 v/v) was added CALB (0.160 g, 2.0 g/g alcohol). The reaction mixture was warmed to 64 °C using a heating block and after 15 minutes, vinyl acetate (0.080 mL, 0.87 mmol, 4.0 eq.) was added. After 34 h, the reaction mixture was allowed to cool to rt. The solids were filtered off and washed with EtOAc (40 mL) and DCM (40 mL). The solvent was removed under reduced pressure and the crude product was purified by flash chromatography (SiO<sub>2</sub>, 5-30% EtOAc/hexanes). The enantiomerically pure acetylated product (*S,S*)-**13** was isolated in 30% yield (0.0264 g, 0.064 mmol) as a colorless thick oil and the enantiomerically pure alcohol (*R,R*)-**6**, in 36% yield (0.029 g, 0.079 mmol) as a white viscous oil. The enantiomeric excess (ee) of 99% was determined by HPLC using an analytical column Chiralpak IA.

**(5*R*,7*S*)-7-allyl-5-methyl-1-tosyl-5-vinyl-1,5,6,7-tetrahydrocyclopenta[*f*]indole (Ia) and (5*R*,7*R*)-7-allyl-5-methyl-1-tosyl-5-vinyl-1,5,6,7-tetrahydrocyclopenta[*f*]indole (Ib)**

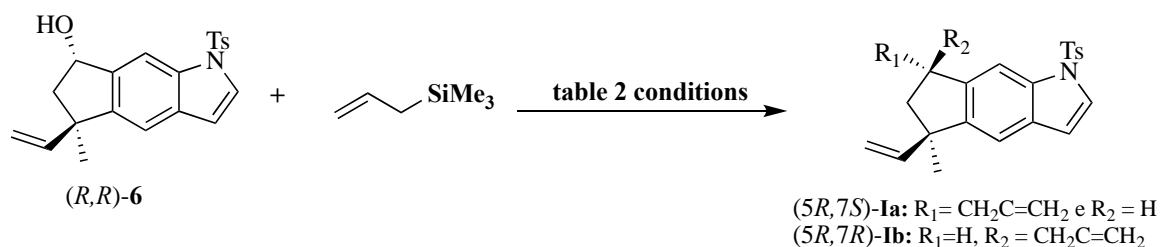

Table 2. Screening of Lewis acids in the allylation reaction.

| Entry | Lewis Acid        | Loading catalyst (mmol) | Time (h) | Ratio Ia:Ib | Yield (%)       |
|-------|-------------------|-------------------------|----------|-------------|-----------------|
| 1     | InCl <sub>3</sub> | 20                      | 27       | 1:4         | 52              |
| 2     | BiBr <sub>3</sub> | 10                      | 1.5      | 1:3         | 66              |
| 3     | FeCl <sub>3</sub> | 10                      | 1.5      | -           | complex mixture |

A All the reactions were carried out at rt and using DCE<sup>b</sup> as the solvent.

To a resealable pressure tube charged with Lewis Acid under nitrogen atmosphere was added a solution of indole (5*R*,7*R*)-**6** and allyltrimethylsilane in DCE. After 1 hour under stirring at room temperature, the reaction mixture was concentrated under reduced pressure and the crude product was purified by flash chromatography (SiO<sub>2</sub>, 5% EtOAc/hexanes) to provide an unseparable 1:2 mixture of (5*R*,7*S*)-**1a** and (5*R*,7*R*)-**1b** in yields as indicated in table 2.

**<sup>1</sup>H NMR (CDCl<sub>3</sub>, solvent) for (5*R*,7*S*)-**1a** and (5*R*,7*R*)-**1b**:** δ 7.81 (s, 1H), 7.77 (d, *J* = 8.0 Hz, 2H), 7.49 (d, *J* = 3.5 Hz, 1H), 7.22 (d, *J* = 8.0 Hz, 2H), 7.15 (s, 1H), [6.56, d, *J* = 4.0 Hz (major) and 6.59, d, *J* = 4.0 Hz (minor), 1H], 6.02 (m, 1H), 5.90 (m, 1H), 5.11 (m, 4H), [3.40, m (major) and 3.29, m (minor), 1H], 2.74 (m, 1H), 2.35 (s, 3H), 2.32 (m, 1H), 2.14 (m, 1H), 1.85 (m, 1H), 1.27 (s, 3H).

**<sup>13</sup>C NMR (126 MHz, CDCl<sub>3</sub>):** δ 147.0, 146.3, 144.8, 143.2, 136.9, 135.4, 134.4, 129.8, 126.9, 125.9, 125.9, 116.2, 115.7, 111.6, 108.9, 108.6, 48.5, 47.2, 41.5, 39.2, 25.6, 21.5.

**HRMS (ESI) *m/z*[M+H]<sup>+</sup>** Calcd for C<sub>24</sub>H<sub>26</sub>NO<sub>2</sub>S 392.1679; Found 392.1676.

**(5*R*,7*S*)-5-Methyl-7-(2-methylallyl)-1-tosyl-5-vinyl-1,5,6,7-tetrahydrocyclopenta[*f*]indole (**14a**) and (5*R*,7*R*)-5-Methyl-7-(2-methylallyl)-1-tosyl-5-vinyl-1,5,6,7-tetrahydrocyclopenta[*f*]indole (**14b**)**

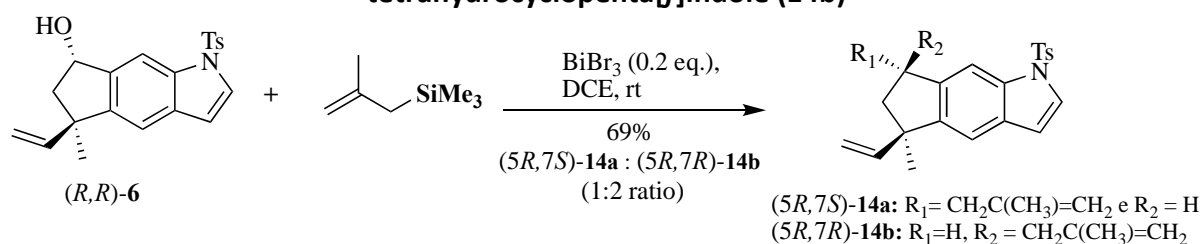

To a resealable pressure tube charged with BiBr<sub>3</sub> (0.031 g, 0.069 mmol, 0.2 eq.) under nitrogen atmosphere was added a solution of indole (*R,R*)-**6** (0.127 g, 0.345 mmol, 1.0 eq.)

and methallylsilane<sup>3</sup> (0.12 mL, 0.69 mmol, 2.0 eq.) in DCE (1.7 mL). After 1 hour under stirring at room temperature the reaction mixture was concentrated under reduced pressure and the crude product was purified by flash chromatography (SiO<sub>2</sub>, 5% EtOAc/hexanes) to provide a 1:2 mixture of (5*R*,7*S*)-**14a** and (5*R*,7*R*)-**14b** in 69% yield (0.096 g, 0.24 mmol) as a colorless viscous oil.

**<sup>1</sup>H NMR (5*R*,7*S*)-**14a** and (5*R*,7*R*)-**14b**:** δ 7.82 (s, 1 H), 7.78 (d, *J* = 8.5 Hz, 2 H), 7.50 (m, 1 H), 7.24 (m, 3 H), [6.57, m (major) and 6.59, m (minor), 1H], [6.05, m (major) and 5.97 m (minor), 1H], 5.11 (m, 2H), 4.88 (m, 2 H), [3.50 m (major) and 3.38 m (minor), 1H], 2.70 (dd, *J* = 6.0 and 14.5 Hz, 1H), 2.35 (s, 3 H), 2.32 (m, 1H), 2.19 (m, 2H), 1.87 (s, 3 H), 1.28 (s, 3 H).

**<sup>13</sup>C NMR (126 MHz, CDCl<sub>3</sub>) δ (ppm):** 147.1, 146.2, 146.2, 144.7, 144.3; 143.7, 135.5, 134.4, 129.8, 126.9, 125.9, 115.6, 111.8, 111.6, 108.9, 108.6, 48.4, 47.6, 43.9, 39.7, 25.7, 22.5, 21.5.

**HRMS (ESI) *m/z*[M+H]<sup>+</sup>** Calcd for C<sub>25</sub>H<sub>28</sub>NO<sub>2</sub>S 406.1841; Found 406.1822.

**IV (cm<sup>-1</sup>):** 2964, 2914, 2857, 1634, 1595, 1494, 1441, 1370, 1340, 1285, 1230, 1183, 1167, 1120, 1092, 999, 919, 878, 806, 732, 702, 672

**(5*R*,7*R*)-5-methyl-7-(2-methylprop-1-en-1-yl)-1-tosyl-5-vinyl-1,5,6,7-tetrahydrocyclopenta[*f*]indole (**18a**) and (5*R*,7*S*)-5-methyl-7-(2-methylprop-1-en-1-yl)-1-tosyl-5-vinyl-1,5,6,7 tetrahydrocyclopenta[*f*]indole (**18b**)**

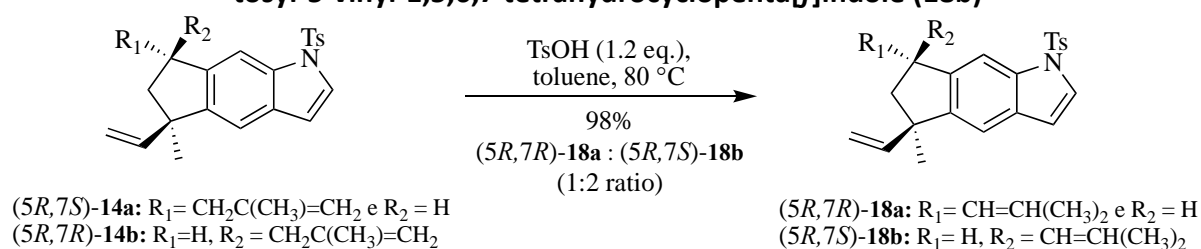

To a 1:2 mixture of indoles **14a** and **14b** (0.0960 g, 0.237 mmol, 1.0 eq.) in a resealable pressure tube was added dry toluene (8 mL). Then TsOH (0.050 g, 0.28 mmol, 1.2 eq.) was added and the temperature was increased to 80 °C using an oil bath. The reaction progress was accompanied by <sup>1</sup>H NMR and after 4 h, the reaction mixture was cooled to rt and concentrated under reduced pressure. The crude product was treated with satd. aq. NaHCO<sub>3</sub> soln. (10 mL) and extracted with EtOAc (3 x 15 mL). The mixture of products (5*R*,7*R*)-**18a** and (5*R*,7*S*)-**18b** was obtained as a brown viscous oil in 98% yield (0.0945 g, 0.233 mmol) and used in the next step without purification.

**<sup>1</sup>H NMR ((5*R*,7*R*)-**18a** and (5*R*,7*S*)-**18b**):**  $\delta$  7.75 (m, 3H), 7.60 (s, 1H), 7.48 (d,  $J$  = 4.0 Hz, 1H), 7.22 (m, 2H), 7.14 (s, 1H), [6.59 m(minor) and 6.56 m (major), 1H], [6.05 m (major) and 6.00 m (minor), 1H], 5.17 (m, 1H), 5.11 (m, 1H), 4.15 m (major) and 4.02 m (minor), 1H], 2.35 (s, 3H), 2.16 (m, 1H), 1.86 (m, 1H), 1.86 (s, 6H), 1.30 (s, 3H).

**<sup>13</sup>C NMR (126 MHz, CDCl<sub>3</sub>)  $\delta$  (ppm):** 146.6, 146.1, 144.7, 143.6, 135.4, 134.4, 133.1, 130.1, 129.7, 127.7, 127.0, 125.8, 115.4, 111.7, 109.3, 108.9, 48.9, 48.7, 41.5, 25.9, 24.9, 21.5, 18.3.

**IV (cm<sup>-1</sup>):** 2961, 2923, 2860, 1639, 1598, 1458, 1439, 1367, 1342, 1290, 1238, 1189, 1169, 1114, 1032, 996, 908, 883, 883, 809, 760, 732, 699, 669.

### 6-Iodo-1-tosil-1H-indol (**17**)

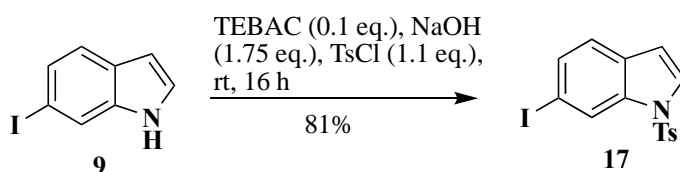

To a solution of indole **9** (0.854 g, 3.51 mmol, 1.00 eq.) in DCM (35 mL) was added TEBAC (0.080 g, 0.35 mmol, 0.10 eq.). Then, NaOH (0.203 g, 6.15 mmol, 1.75 eq.) and TsCl (0.734 g, 3.864 mmol, 1.10 eq.) were added. The reaction mixture was stirred at room temperature for 16 h and quenched with H<sub>2</sub>O (50 mL) and of 1 M HCl (30 mL). After stirring for 10 min, the aqueous layer was separated and extracted with DCM (3 x 100 mL). The organic layer was washed with brine, dried over MgSO<sub>4</sub> and evaporated under reduced pressure. The resulting residue was purified by flash column chromatography (SiO<sub>2</sub>, 5-10% AcOEt/hexanes) to provide **17** (1.14 g, 2.87 mmol) in 82% yield as a yellow solid.

**<sup>1</sup>H NMR (300 MHz, CDCl<sub>3</sub>):**  $\delta$  8.36 (t,  $J$  = 6.6 Hz, 1 H), 7.75 (d,  $J$  = 8.4 Hz, 2 H), 7.52 – 7.47 (m, 2 H), 7.27 – 7.22 (m, 3 H), 6.61 (dd,  $J$  = 3.9 and 0.9 Hz, 1 H), 2.34 (s, 3 H).

**<sup>13</sup>C NMR (75 MHz, CDCl<sub>3</sub>):**  $\delta$  145.2, 135.7, 135.0, 132.2, 130.0, 129.9, 126.7, 126.5, 122.8, 122.3, 108.7, 88.7, 21.5.

**HRMS (ESI)  $m/z$ [M+H]<sup>+</sup>** Calcd for C<sub>15</sub>H<sub>13</sub>INO<sub>2</sub>S 397.9707; Found 397.9708.

**Mp** = 124.8 - 125.3 °C.

**(5*R*,7*R*)-5-Methyl-1-tosyl-5-((*E*)-2-(1-tosyl-1*H*-indol-6-yl)vinyl)-1,5,6,7-tetrahydrocyclopenta[*f*]indol-7-ol (**15**)**

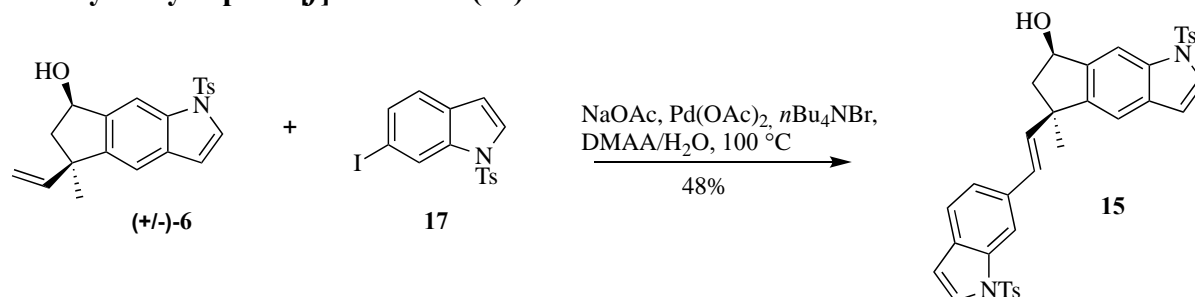

To a dried round bottom flask charged with the tricyclic indole (+/-)-**6** (0.030 g, 0.082 mmol, 1.00 eq.), *N*-tosyl 6-iodo-indole **17** (0.065 g, 0.16 mmol; 2.0 eq.), NaOAc (0.013 g, 0.16 mmol, 2.0 eq.), Pd(OAc)<sub>2</sub> (0.002 g, 0.008 mmol, 0.1 eq.) and *n*-Bu<sub>4</sub>NBr (0.0060 g, 0.016 mmol, 0.20 eq.). Degassed DMAA/H<sub>2</sub>O (0.96 mL, 9:1, v/v) was added under a nitrogen atmosphere and the reaction mixture was kept under stirring at 100 °C using an oil bath for 12 h. After that, the reaction mixture was allowed to reach rt and quenched by the addition of H<sub>2</sub>O (2 mL), extracted with DCM (3 x 5 mL), washed with saturated solution of NaHCO<sub>3</sub> (30 mL) and brine (40 mL). The combined organics were dried over MgSO<sub>4</sub>, filtered and the solvent was removed by reduced pressure. The crude product was purified by flash column chromatography (SiO<sub>2</sub>, 5-10% AcOEt/hexanes) to furnish tosyl indole **15** (0.025 g, 0.039 mmol) in 48% yield as a yellow oil.

**<sup>1</sup>H NMR (500 MHz, CDCl<sub>3</sub>):** δ 8.05 (m, 1H), 7.91 (m, 1H), 7.82 (m, 2H), 7.73 (m, 2H), 7.59 (d, J = 3.5 Hz, 1H), 7.49 (d, J = 4.0 Hz, 1H), 7.41 (m, 1H), 7.32 (s, 1H), 7.29 (dd, J = 1.5 and 8.0 Hz, 1H), 7.25 (m, 2H), 7.21 (m, 2H), 6.63 (dd, J = 0.8 and 3.6 Hz, 1H), 6.59 (dd, J = 0.65 and 3.65 Hz, 1H), 6.56 (d, J = 16.1 Hz, 1H), 6.49 (d, J = 16.1 Hz, 1H), 5.38 (t, J = 6.2 Hz, 1H), 2.55 (m, 1H), 2.35 (s, 3H), 2.33 (s, 3H), 2.26 (m, 1H), 1.47 (s, 3H).

**<sup>13</sup>C NMR (126 MHz, CDCl<sub>3</sub>):** δ 144.9, 144.9, 141.7, 139.0, 135.4, 135.4, 135.4, 134.6, 134.2, 131.8, 130.0, 130.0, 127.4, 126.9, 126.7, 126.6, 121.4, 121.3, 116.3, 111.7, 109.5, 109.1, 108.8, 75.0, 74.5, 51.7, 47.5, 27.0, 24.8, 21.6, 21.5.

**HRMS (ESI-TOF) *m/z*[M+H-H<sub>2</sub>O]<sup>+</sup>** Calcd for C<sub>36</sub>H<sub>31</sub>N<sub>2</sub>O<sub>4</sub>S<sub>2</sub> 619.1720; Found 619.1710.

**(5*R*,7*R*)-5-methyl-7-(2-methylprop-1-en-1-yl)-1-tosyl-5-((*E*)-2-(1-tosyl-1*H*-indol-6-yl)vinyl)-1,5,6,7-tetrahydrocyclopenta[*f*]indole (19a) and**  
**(5*R*,7*S*)-5-methyl-7-(2-methylprop-1-en-1-yl)-1-tosyl-5-((*E*)-2-(1-tosyl-1*H*-indol-6-yl)vinyl)-1,5,6,7-tetrahydrocyclopenta[*f*]indole (19b)**

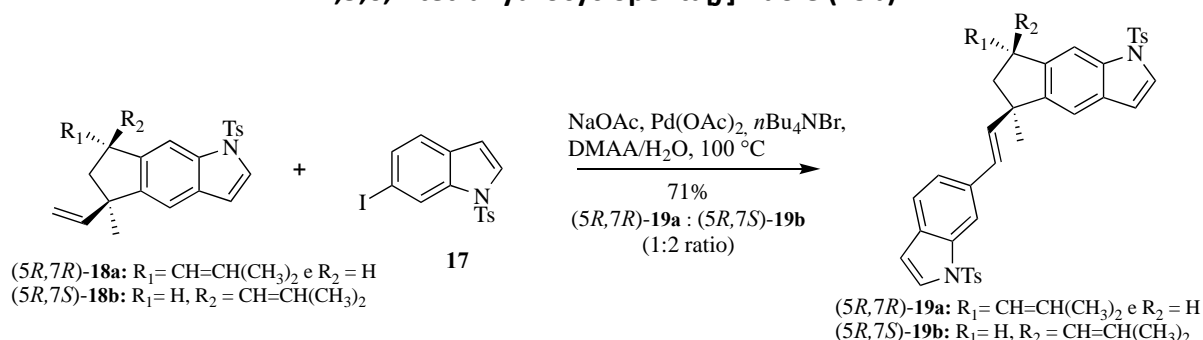

To a dried round bottom flask charged with a 1:2 mixture of tricyclic indoles **18a** and **18b** (0.0080 g, 0.020 mmol, 1.0 eq.), iodoindole **17** (0.016 g, 0.039 mmol; 2.0 eq.), NaOAc (0.0030 g, 0.039 mmol, 2.0 eq.), Pd(OAc)<sub>2</sub> (0.044 g, 0.0020 mmol, 0.10 eq.) and *n*-Bu<sub>4</sub>NBr (0.001 g, 0.004 mmol, 0.2 eq.) was added degassed DMAA/H<sub>2</sub>O (0.5 mL, 9:1, v/v) under nitrogen atmosphere and the reaction mixture was kept under stirring at 100 °C using an oil bath for 22 h. After that, the reaction mixture was allowed to reach rt and quenched with H<sub>2</sub>O (1 mL) extracted with DCM (3 x 5 mL), washed with saturated solution of NaHCO<sub>3</sub> (15 mL) and brine (20 mL), dried over MgSO<sub>4</sub>, filtered and the solvent was removed under reduced pressure. The crude product was purified by flash column chromatography (SiO<sub>2</sub>, 5-10% AcOEt/hexanes) to furnish a mixture of diastereomers (5*R*,7*R*)-**19a** and (5*R*,7*S*)-**19b** (0.0096 g, 0.014 mmol), in 71% yield, as a yellow solid.

The diastereoisomers were separated by preparative HPLC using a chiral column Chiralpak® IA (21 x 250 mm, 5 μm, 3:97 v/v, *i*-PrOH/hexanes, isocratic mode, flow 12.6 mL/min, UV detection at 291 nm).

#### Minor isomer (5*R*,7*R*)-**19a**

**<sup>1</sup>H NMR (400 MHz, CDCl<sub>3</sub>):** δ 7.83 (s, 1H), 7.79 (d, *J* = 8.4 Hz, 2H), 7.72 (d, *J* = 8.4 Hz, 2H), 7.65 (s, 1H), 7.54 (d, *J* = 3.6 Hz, 1H), 7.47 (d, *J* = 3.6 Hz, 1H), 7.38 (d, *J* = 8.4 Hz, 1H), 7.31 (s, 1H), 7.23 (m, 5H), 6.64 (dd, *J* = 0.8 and 3.6 Hz, 1H), 6.57 (dd, *J* = 0.8 and 3.6 Hz, 1H), 6.43 (d, *J* = 16.0 Hz, 1H), 6.10 (d, *J* = 16.0 Hz, 1H), 5.18 (m, 1H), 4.09 (m, 1H), 2.47 (m, 1H), 2.35 (d, *J* = 10.4 Hz, 6H), 1.88 (s, 3H), 1.84 (s, 3H), 1.84 (m, 1H), 1.25 (s, 3H).

**<sup>13</sup>C NMR (126 MHz, CDCl<sub>3</sub>):** δ 144.9, 144.8, 144.7, 144.4, 138.1, 135.4, 135.4, 135.4, 134.5, 134.5, 133.4, 130.1, 129.9, 129.8, 129.7, 127.7, 127.0, 126.7, 126.6, 126.4, 125.8, 121.5, 121.1, 115.8, 111.5, 109.2, 109.1, 109.0, 49.6, 48.5, 41.2, 26.9, 25.9, 21.6, 21.5, 18.4.

**IV (cm<sup>-1</sup>):** 3896, 3849, 3838, 3747, 3742, 3497, 3494, 3472, 1450, 1433, 1367, 1169, 1117, 1090, 996, 881, 809, 732, 696.6.

**HRMS (ESI) *m/z*[M+H]<sup>+</sup> of 19a and 19b** Calcd for C<sub>40</sub>H<sub>39</sub>N<sub>2</sub>O<sub>4</sub>S<sub>2</sub> 675.2351; Found 675.2313.

**Mp:** 106.7-109.1 °C.

### Major isomer (5*R*,7*S*)-19b

**<sup>1</sup>H NMR (400 MHz, CDCl<sub>3</sub>):** δ 7.96 (s, 1H), 7.76 (m, 4H), 7.65 (s, 1H), 7.50 (m, 2H), 7.43 (d, *J* = 8.0 Hz, 1H), 7.34 (dd, *J* = 1.6, 8.4 Hz, 1H), 7.22 (m, 5H), 6.65 (d, *J* = 16.0, 1H), 6.60 (dd, *J* = 0.8, 3.6 Hz, 1H), 6.56 (dd, *J* = 0.8, 3.6 Hz, 1H), 6.49 (d, *J* = 16, 1H), 5.22 (m, 1H), 4.23 (m, 1H), 2.36 (d, *J* = 9.6 Hz, 6H), 2.30 (m, 1H), 2.00 (m, 1H), 1.89 (d, *J* = 1.2 Hz, 6H), 1.45 (s, 3H).

**<sup>13</sup>C NMR (126 MHz, CDCl<sub>3</sub>):** δ 146.2, 144.9, 144.8, 143.6, 143.5, 138.6, 135.4, 135.4, 134.6, 134.5, 133.3, 130.2, 129.9, 129.9, 127.6, 127.4, 127.0, 126.7, 126.5, 125.9, 121.4, 121.3, 114.4, 115.6, 111.6, 109.4, 109.1, 108.9, 49.4, 48.5, 41.6, 25.9, 25.6, 21.6, 21.5, 18.4.

**HRMS (ESI) *m/z*[M+H]<sup>+</sup> of 19a and 19b** Calcd for C<sub>40</sub>H<sub>39</sub>N<sub>2</sub>O<sub>4</sub>S<sub>2</sub> 675.2351; Found 675.2313.

**Mp:** 104.2-109.2 °C.

**IV (cm<sup>-1</sup>):** 3846, 3830, 3813, 3791, 1436, 1373, 1271, 1172, 1114, 1092, 1026, 1002, 966, 848, 812, 719, 699.

### (5*R*,7*R*)-5-((*E*)-2-(1*H*-Indol-6-yl)vinyl)-5-methyl-7-(2-methylprop-1-en-1-yl)-1,5,6,7-tetrahydrocyclopenta[*f*]indole (1)

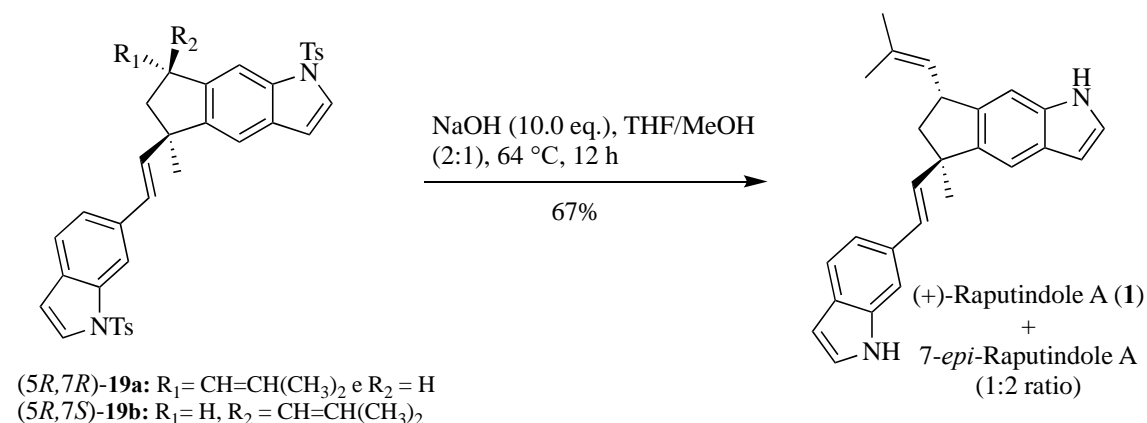

To a solution of bisindole mixture **19a:19b** (0.055 g, 0.081 mmol, 1.0 eq.) dissolved in a mixture of MeOH/THF (1.2 mL, 2:1, v/v) was added NaOH (0.036 g, 0.81 mmol, 10 eq.). The reaction mixture was warmed to 64 °C using a heating block and stirred during 12 h. Upon completion of the reaction, the organic solvent was removed under reduced pressure and H<sub>2</sub>O was added (1 mL). The mixture was extracted with EtOAc (3 x 3 mL) and the combined organic layer was washed with brine (10 mL). After drying over MgSO<sub>4</sub>, the solvent was removed under reduced pressure and the residue was purified by column chromatography (activated neutral alumina, 5-20% EtOAc/hexanes) to provide raputindole A (**1**), as the minor isomer, together with its C-6 epimer (1:2 ratio), in 67% yield (0.020 g, 0.055 mmol) as a yellow oil. The diastereoisomers were separated by preparative HPLC using a chiral column Chiralpak® IA (21 x 250 mm, 5 µm, 12:88 v/v, *i*-PrOH/hexane, isocratic mode, flow 12.6 mL/min, UV detection at 291 nm). Pure (+)-raputindole A (**1**) {[α]<sup>22</sup><sub>D</sub> = +76 (c 0.10, MeOH, 20 °C)} was isolated (R<sub>T</sub> = 32.11 min) and its C-6 epimer (R<sub>T</sub> = 36.73 min) both as colorless oil.

#### (+)-Raputindole A (**1**)

**<sup>1</sup>H NMR (500 MHz, CDCl<sub>3</sub>) δ (ppm)** = 8.04 (br s, 1H, H-1'), 8.02 (br s, 1H, H-1''), 7.50 (d, *J* = 8.25, 1H, H-4''), 7.44 (s, 1H, H-4'), 7.26 (s, 1H, H-7''), 7.17 (t, *J* = 2.45, 1H, H-2'), 7.15 (m, 1H, H-5''), 7.13 (m, 1H, H-2''), 7.08 (s, 1H, H-7'), 6.53 (m, 1H, H-3'), 6.47 (m, 1H, H-3''), 6.45 (d, *J* = 15.9, 1H, H-2), 6.15 (d, *J* = 16.9, 1H, H-1), 5.22 (d, *J* = 9.0, 1H, H-7), 4.07 (m, 1H, H-6), 2.44 (dd, *J* = 6.85 and 12.1, 1H, H-5β), 1.82 (m, 1H, H-5α), 1.82 (d, 3H, *J* = 1.4, H-9), 1.79 (d, 3H, *J* = 1.3, H-10), 1.61 (s, 3H, H-4).

**<sup>13</sup>C NMR (800 MHz, CDCl<sub>3</sub>) δ (ppm)** = 142.2 (C-6'), 141.5 (C-5'), 137.2 (C-2), 136.2 (C-7''a), 135.7 (C-7'a), 132.6 (C-8), 132.2 (C-6''), 128.3 (C-7), 127.2 (C-3'a), 127.0 (C-3''a), 126.8 (C-1), 124.3 (C-2''), 123.7 (C-2'), 120.5 (C-4''), 118.5 (C-5''), 115.0 (C-4'), 108.9 (C-7''), 106.2 (C-7'), 102.6 (C-3''), 102.5 (C-3'), 49.9 (C-5), 48.4 (C-3), 41.0 (C-6), 27.2 (C-4), 25.9 (C-9), 18.3 (C-10).

**HRMS (ESI) *m/z* [M+H<sup>+</sup>]** Calcd for C<sub>26</sub>H<sub>27</sub>N<sub>2</sub> 367.2174; Found 367.2166.

[α]<sup>22</sup><sub>D</sub> = +76 (c 0.10, MeOH, 20 °C)



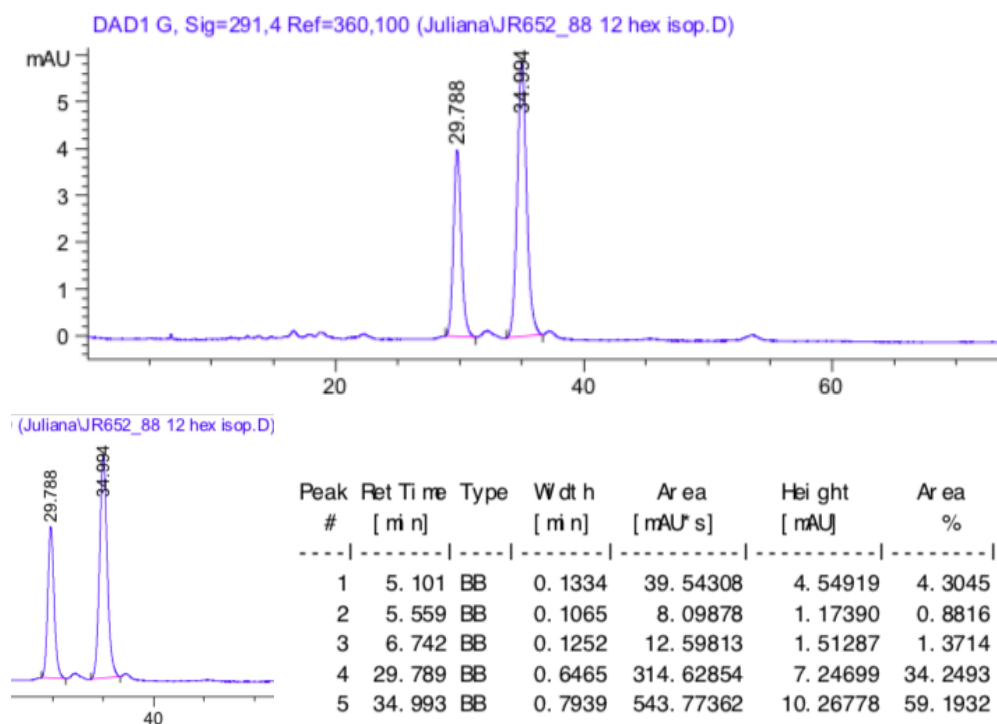

**Figure 3.** HPLC chromatogram of mixture (+)-raputindole A (**1**) and 7-*epi*-raputindole A. Chiral column Chiralpak® IA (4.6 x 250 mm, 5  $\mu$ m, 12:88 v/v, *i*-PrOH/hexane, isocratic mode, flow 0.6 mL/min, UV detection at 291 nm).

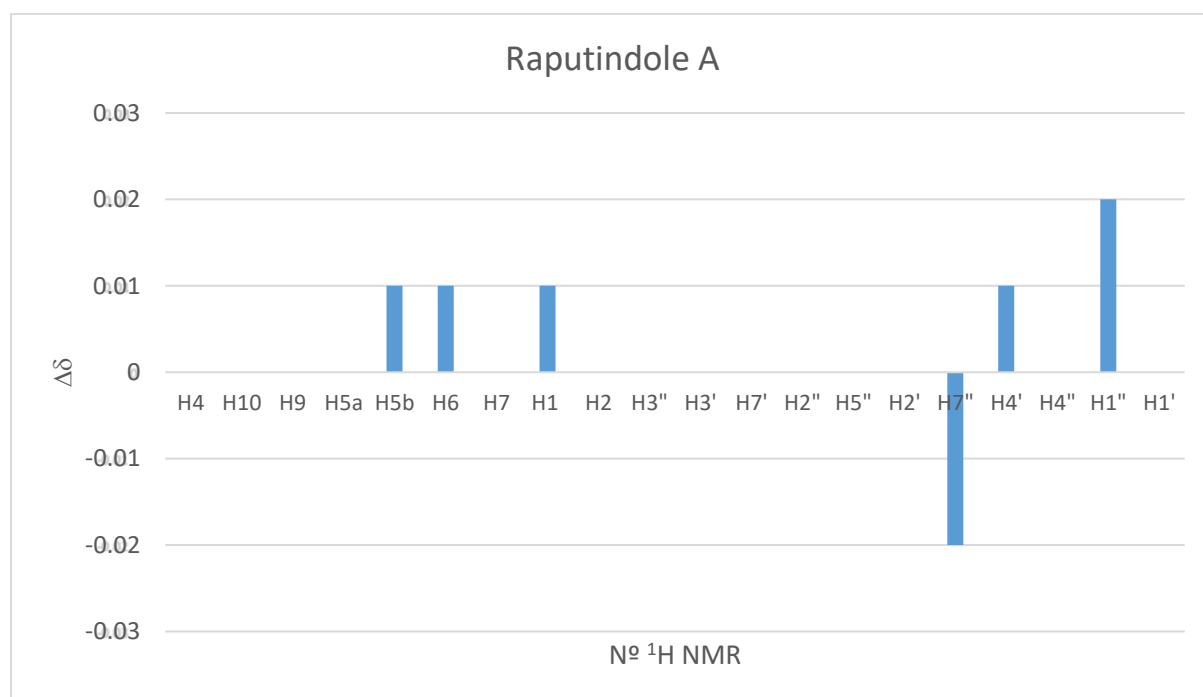

**Figure 4.** Differences  $\delta$  (ppm) between  $^1\text{H}$  NMR (+)-raputindole A (**1**) synthetic and natural.

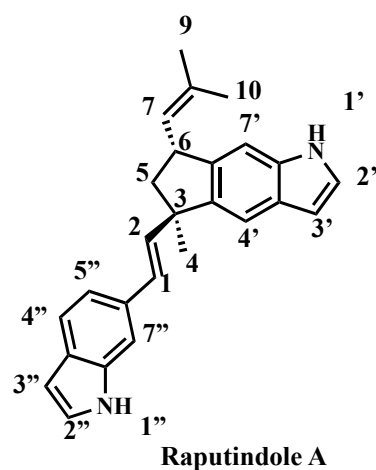

**Figure 5.** Numbering of Hydrogens.

**Table 2.** Comparison of  $^1\text{H}$  NMR chemical shifts of synthetic and natural (+)-raputindole A (**1**), in ppm.

| Hydrogen | Natural | JR670 | (Nat – JR670) |
|----------|---------|-------|---------------|
| H4       | 1,61    | 1,61  | 0             |
| H10      | 1,79    | 1,79  | 0             |
| H9       | 1,82    | 1,82  | 0             |
| H5a      | 1,82    | 1,82  | 0             |
| H5b      | 2,45    | 2,44  | 0,01          |
| H6       | 4,08    | 4,07  | 0,01          |
| H7       | 5,22    | 5,22  | 0             |
| H1       | 6,14    | 6,15  | 0,01          |
| H2       | 6,45    | 6,45  | 0             |
| H3''     | 6,47    | 6,47  | 0             |
| H3'      | 6,53    | 6,53  | 0             |
| H7'      | 7,08    | 7,08  | 0             |
| H2''     | 7,13    | 7,13  | 0             |
| H5''     | 7,15    | 7,15  | 0             |
| H2'      | 7,17    | 7,17  | 0             |
| H7''     | 7,24    | 7,26  | -0,02         |
| H4'      | 7,45    | 7,44  | 0,01          |
| H4''     | 7,5     | 7,5   | 0             |

|      |      |      |      |
|------|------|------|------|
| H1'' | 8    | 8,02 | 0,02 |
| H1'  | 8,04 | 8,04 | 0    |

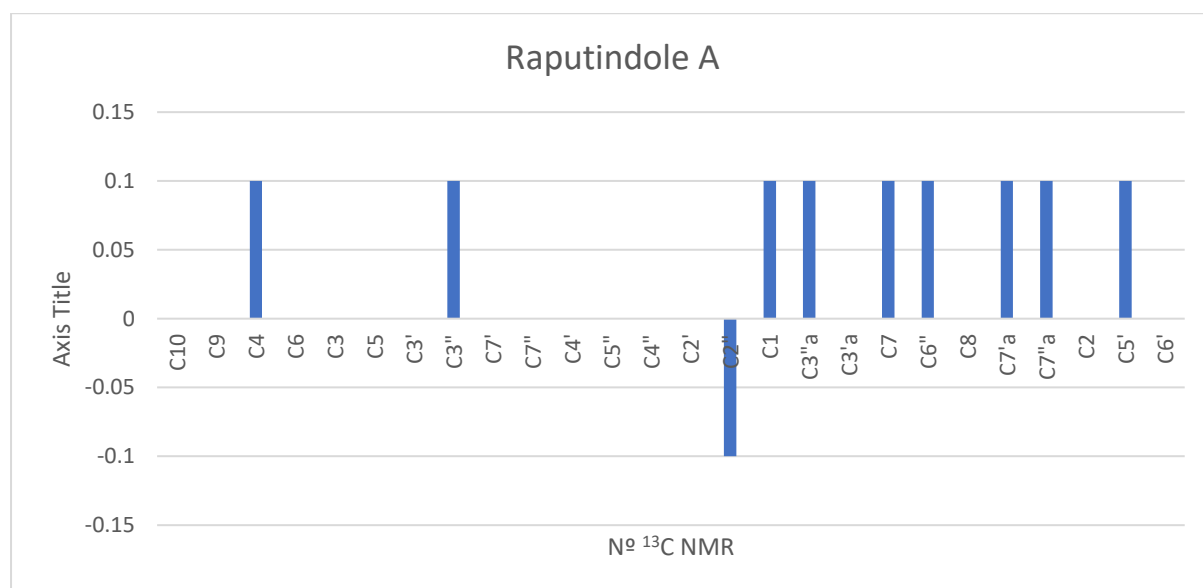

**Figure 5.** Differences  $\delta$  (ppm) between  $^{13}\text{C}$  NMR (+)-raputindole A (**1**) synthetic and natural.

**Table 3.** Comparison of  $^{13}\text{C}$  NMR chemical shifts of (+)-raputindole A (**1**) synthetic and natural in ppm.

| Carbon | Natural | JR670 | (Nat – JR670) |
|--------|---------|-------|---------------|
| C10    | 18,3    | 18,3  | 0             |
| C9     | 25,9    | 25,9  | 0             |
| C4     | 27,20   | 27,1  | 0,1           |
| C6     | 41      | 41    | 0             |
| C3     | 48,4    | 48,4  | 0             |
| C5     | 50      | 50    | 0             |
| C3'    | 102,6   | 102,5 | 0             |
| C3''   | 102,7   | 102,6 | 0,1           |
| C7'    | 106,2   | 106,2 | 0             |
| C7''   | 108,9   | 108,9 | 0             |
| C4'    | 115     | 115   | 0             |
| C5''   | 118,5   | 118,5 | 0             |

|       |       |       |      |
|-------|-------|-------|------|
| C4''  | 120,5 | 120,5 | 0    |
| C2'   | 123,7 | 123,7 | 0    |
| C2''  | 124,2 | 124,3 | -0,1 |
| C1    | 126,9 | 126,8 | 0,1  |
| C3''a | 127,1 | 127   | 0,1  |
| C3'a  | 127,2 | 127,2 | 0    |
| C7    | 128,4 | 128,3 | 0,1  |
| C6''  | 132,3 | 132,2 | 0,1  |
| C8    | 132,6 | 132,6 | 0    |
| C7'a  | 135,8 | 135,7 | 0,1  |
| C7''a | 136,3 | 136,2 | 0,1  |
| C2    | 137,2 | 137,2 | 0    |
| C5'   | 141,6 | 141,5 | 0,1  |
| C6'   | 142,2 | 142,2 | 0    |

---

#### **7-*epi*-Raputindole A (7-*epi*-1)**

**<sup>1</sup>H NMR (500 MHz, CDCl<sub>3</sub>) δ (ppm)** = 8.10 (brs, 1H), 8.02 (brs, 1H), 7.56 (d, J = 8.25 Hz, 1H), 7.43 (s, 1H), 7.36 (s, 1H), 7.17 (dd, J = 2.3, 3.1, 3.3 Hz, 1H), 7.13 (dd, J = 2.45, 3.25, 3.15 Hz, 1H), 7.08 (s, 1H), 6.67 (d, J = 16.05 Hz, 1 H), 6.53 (d, J = 16.05 Hz, 1 H), 6.51 (m, 1H), 6.45 (m, 1H), 5.25 (d, J = 9.0 Hz, 1H), 4.22 (m, 1H), 2.26 (dd, J = 6.95, 12.25 Hz, 1H), 2.00 (dd, J = 10.3, 12.35 Hz, 1H), 1.85 (d, J = 1.35 Hz, 3H), 1.83 (d, J = 1.4 Hz, 3H), 1.49 (s, 3H).

**<sup>13</sup>C NMR (800 MHz, CDCl<sub>3</sub>) δ (ppm)** = 143.27, 140.94, 137.81, 136.23, 135.61, 132.53, 132.28, 128.24, 127.38, 127.24, 127.10, 124.39, 123.86, 120.62, 118.56, 114.95, 108.72, 106.34, 102.64, 102.43, 49.78, 48.30, 41.34, 25.95, 25.57, 18.29.

**HRMS (ESI) m/z [M+H<sup>+</sup>]** Calcd for C<sub>26</sub>H<sub>27</sub>N<sub>2</sub> 367.2174; Found 367.2166.

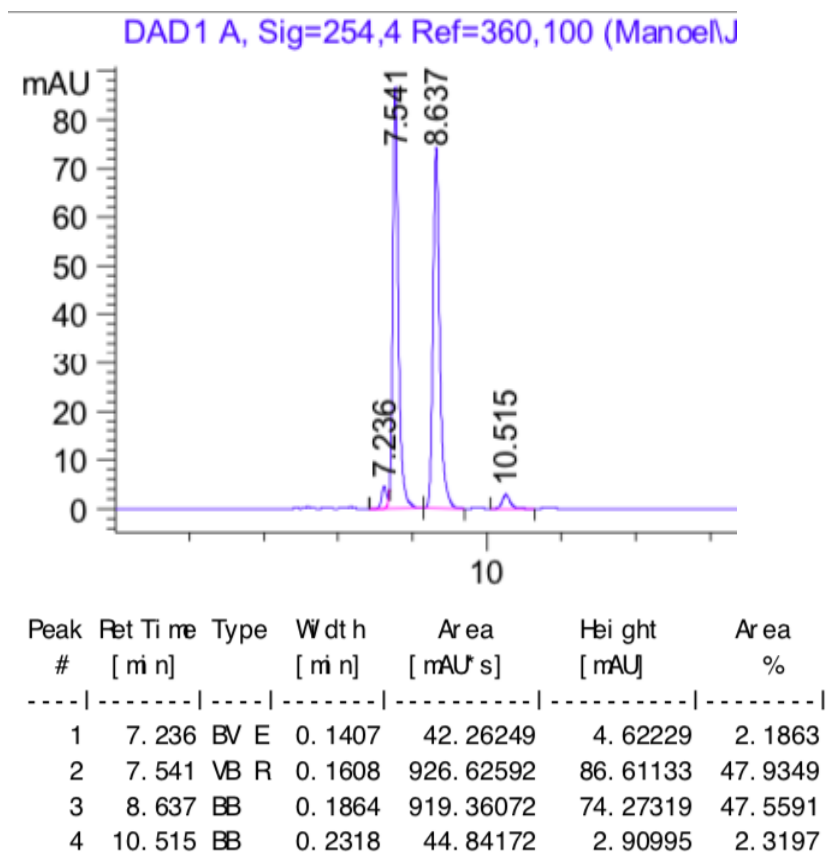

**Figure 1.** HPLC chromatogram of racemic acetate (+/-)-**13**. Chiral column Chiralpak® IA (4.6 x 250 mm, 5 µm, 10:90 v/v, *i*-PrOH/hexane, isocratic mode, flow 1.0 mL/min, UV detection at 254 nm).

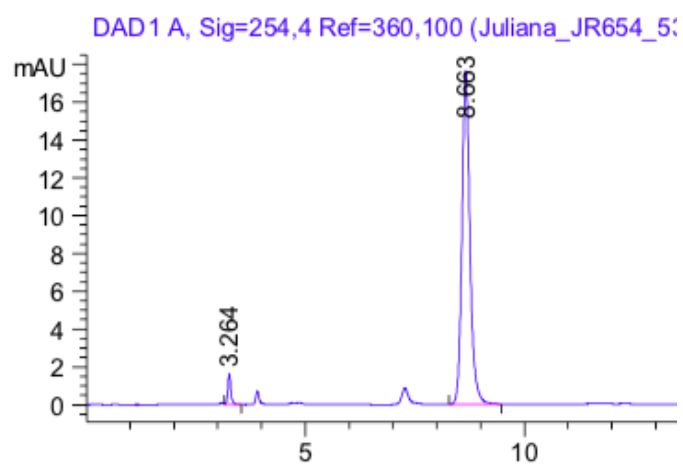

| Peak # | Ret Time [min] | Type | Width [min] | Area [mAU*s] | Height [mAU] | Area %  |
|--------|----------------|------|-------------|--------------|--------------|---------|
| 1      | 3.264          | BB   | 0.0698      | 7.37568      | 1.59971      | 1.5411  |
| 2      | 8.663          | BB   | 0.1922      | 223.98225    | 17.63116     | 46.7990 |
| 3      | 19.222         | BB   | 0.4876      | 247.24731    | 7.63991      | 51.6600 |

**Figure 2.** HPLC chromatogram of acetate (5S,7S)-**13**. Chiral column Chiralpak® IA (4.6 x 250 mm, 5 µm, 10:90 v/v, *i*-PrOH/hexane, isocratic mode, flow 1.0 mL/min, UV detection at 254 nm).

## References

1. Perrin, D. D., Amarego, W. L. F. Purification of laboratory chemicals. **1988**. 3 rd ed. Oxford, New York, Pergamon Press.
2. Nishimura, T., Yasuhara, Y., Hayashi, T. Iridium-Catalyzed [3 + 2] Annulation of 1,3-Dienes with *ortho*-Carbonylated Phenylboronic Acids. A Catalytic Process Involving Regioselective 1,2-Addition. *J. Am. Chem. Soc.* **2007**. 129, 24, 7506-7507.
3. Marković, D., Tchawou, W. A., Novosjolova, I., Laclef, S., Stepanovs, D., Turks, M., Vogel, P. Synthesis and Applications of Silyl 2-Methylprop-2-ene-1-sulfonates in Preparative Silylation and GC-Derivatization Reactions of Polyols and Carbohydrates. *Chem. Eur. J.* **2016**. 22, 12, 4196-4205.
4. Anbu, N., Nagarjun, N., Jacob, M., Kalaiarasi, J. M. V., Dhakshinamoorthy, A. Acetylation of Alcohols, Amines, Phenols, Thiols under Catalyst and Solvent-Free Conditions. *Chemistry*. **2019**. 1, 1, 69-79.
5. Kock, M., Jones, P. G., Lindel, T. Total Synthesis and Absolute Configuration of Raputindole A. *Org. Lett.* **2017**. 19, 23, 6296-6299.
14. Kock, M., Lindel, T., Diastereoselective Total Synthesis of Raputindole A. *Org. Lett.* **2018**. 20, 17, 5444-5447.

# NMR Spectra

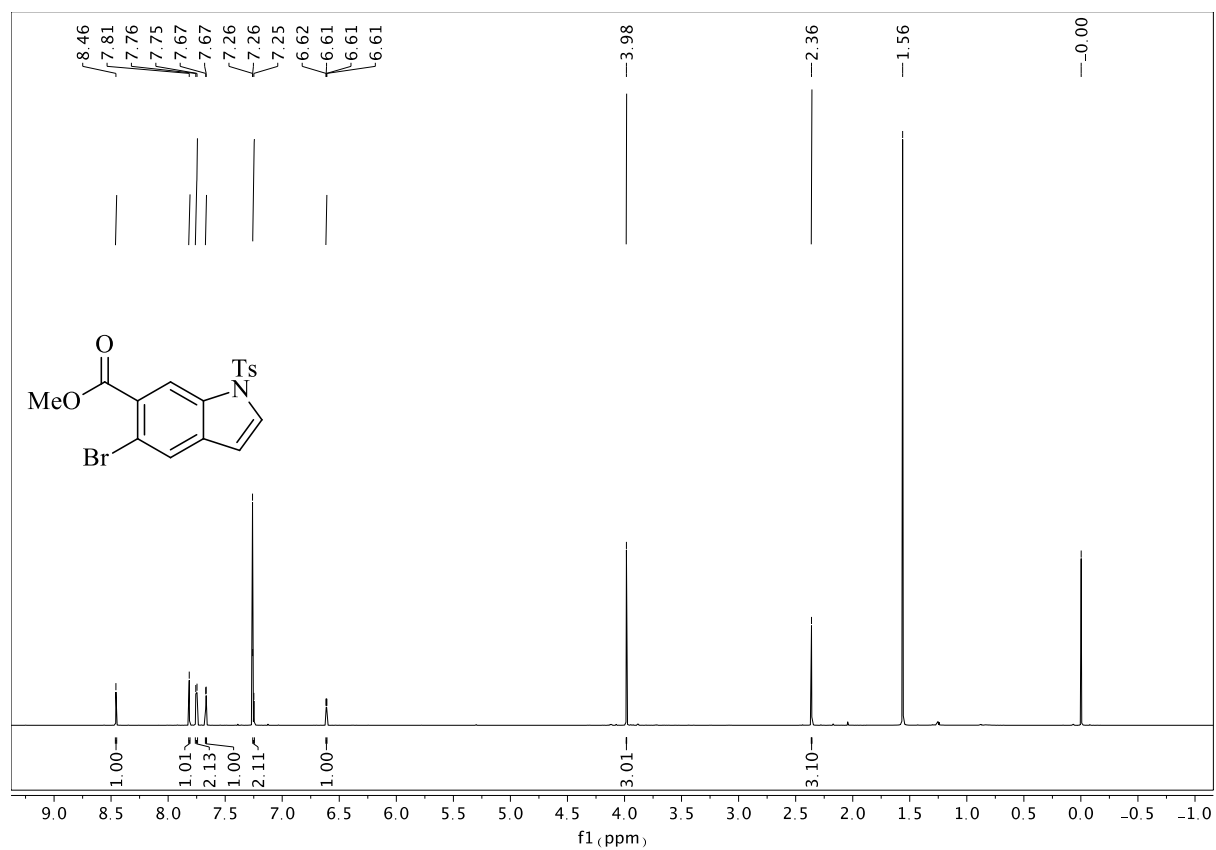

<sup>1</sup>H NMR (800 MHz, CDCl<sub>3</sub>) Spectrum of Compound **8b**. (residual water: in 1.55 ppm).

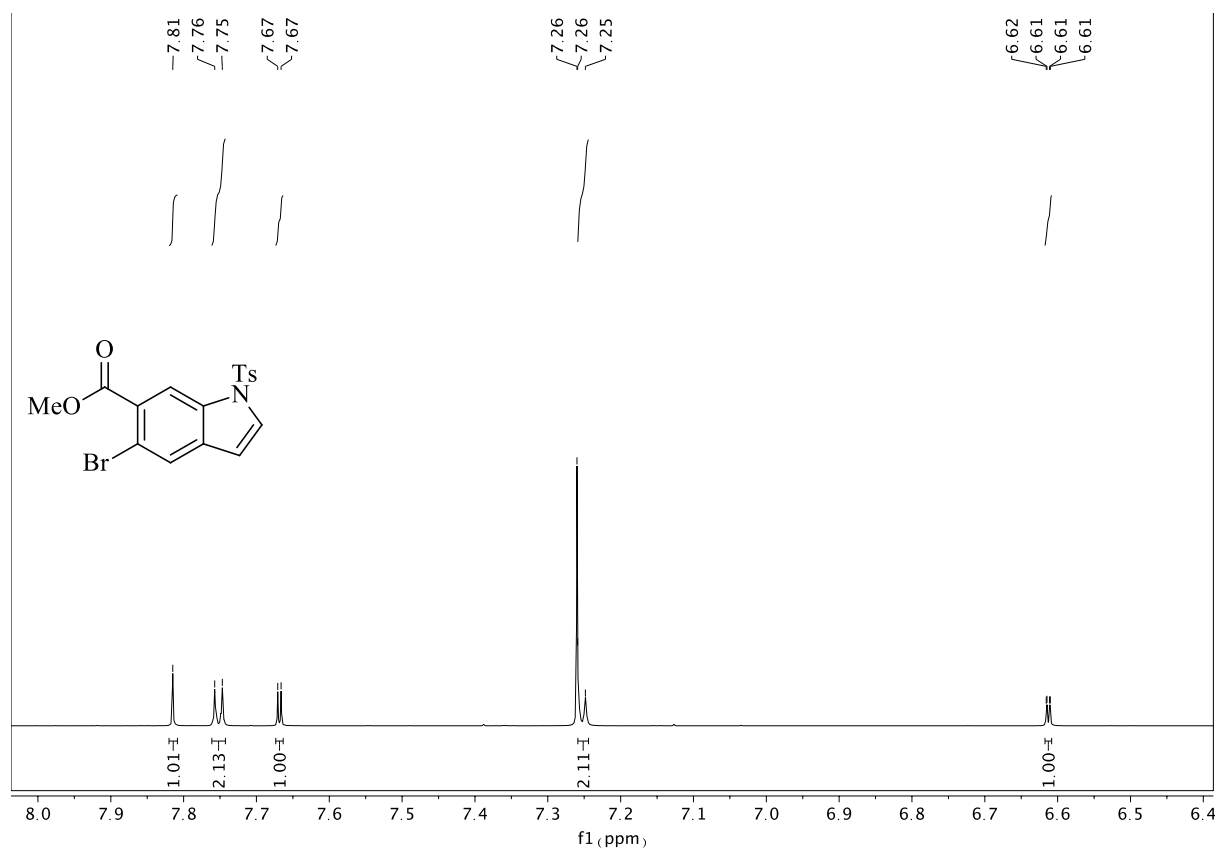

**<sup>1</sup>H NMR (800 MHz, CDCl<sub>3</sub>) Spectrum of Compound **8b**.**

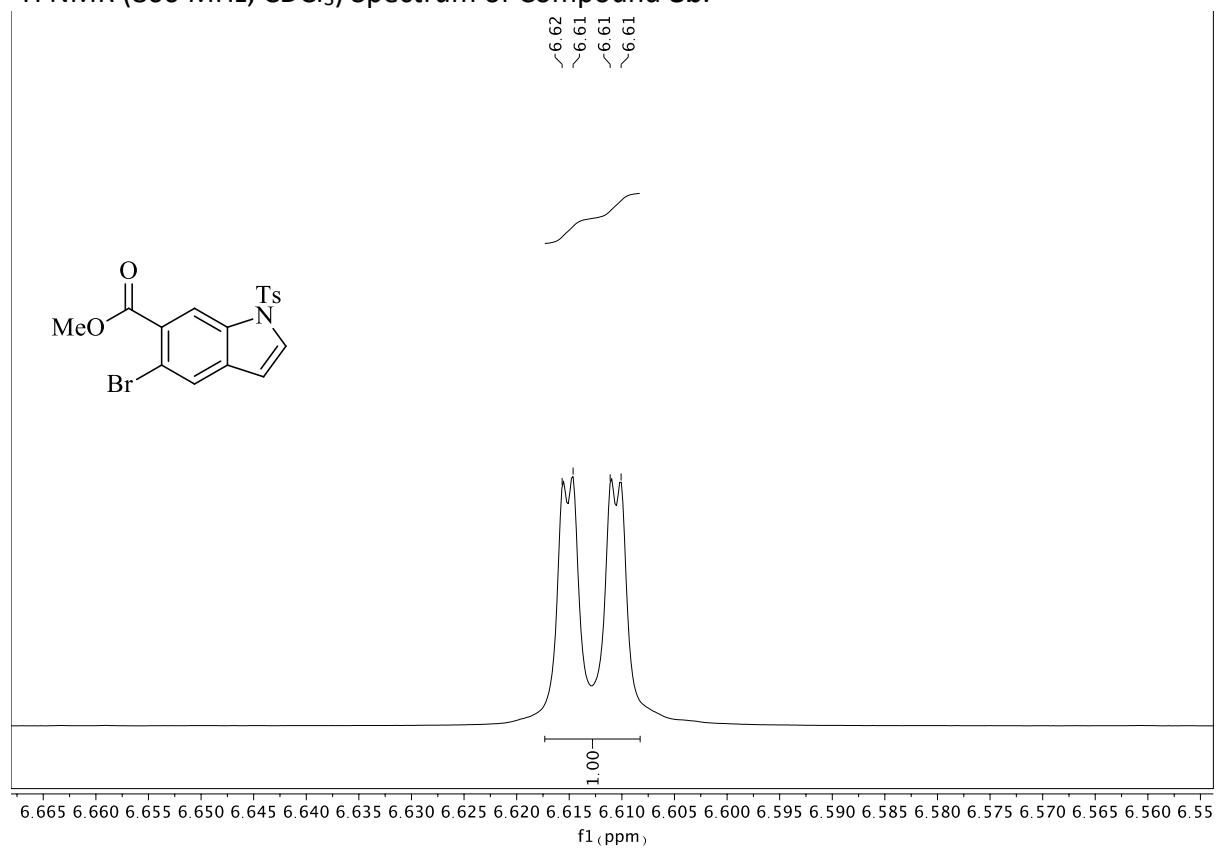

**<sup>1</sup>H NMR (800 MHz, CDCl<sub>3</sub>) Spectrum of Compound **8b**.**



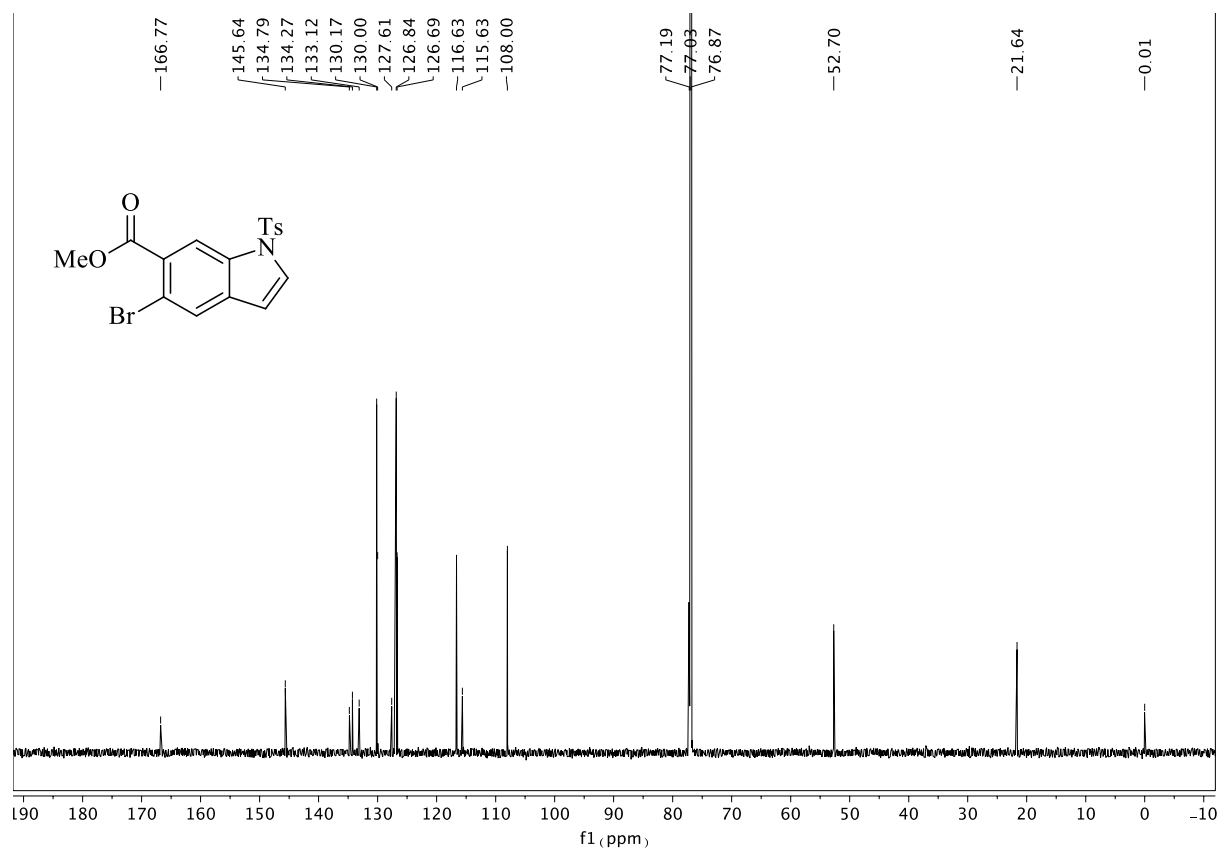

**<sup>13</sup>C NMR (200 MHz, CDCl<sub>3</sub>) Spectrum of Compound **8b**.**

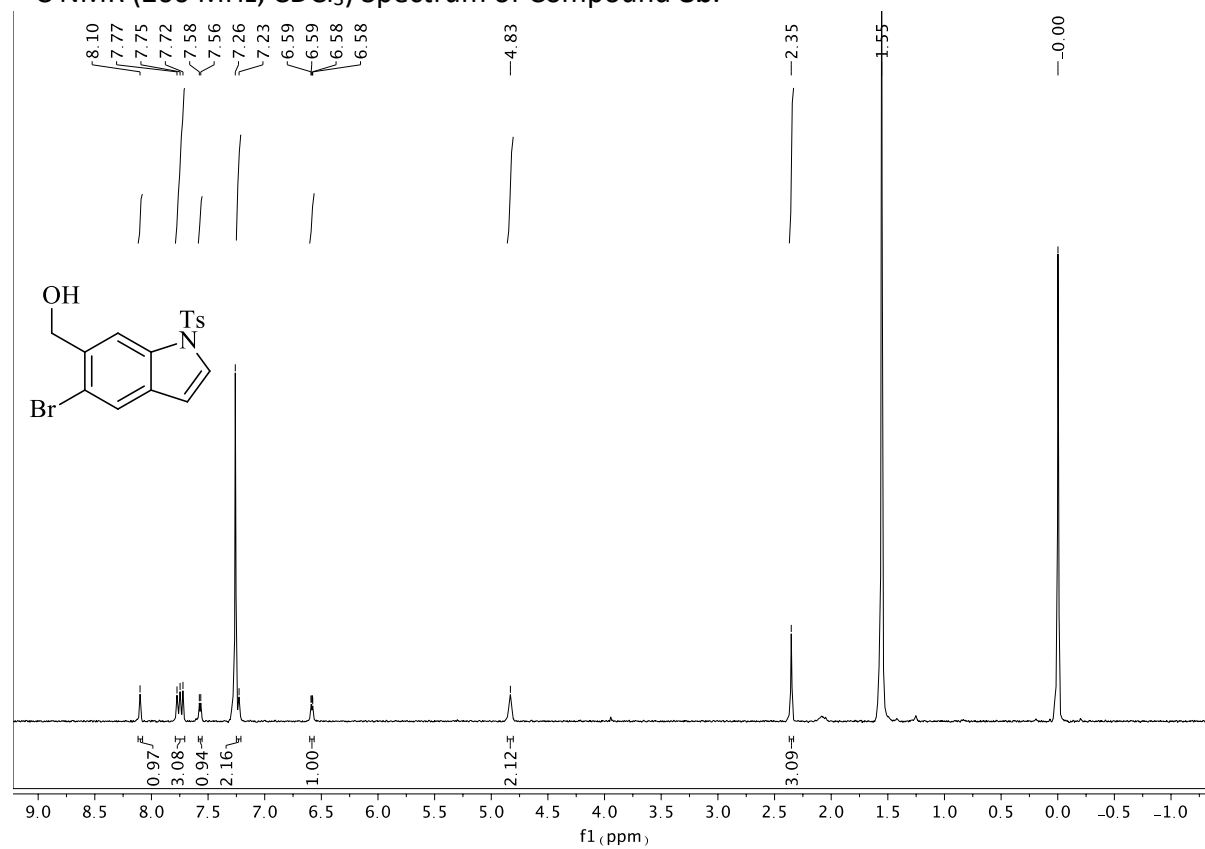

**<sup>1</sup>H NMR (300 MHz, CDCl<sub>3</sub>) Spectrum of Compound **10**. (residual water: 1.55 ppm).**

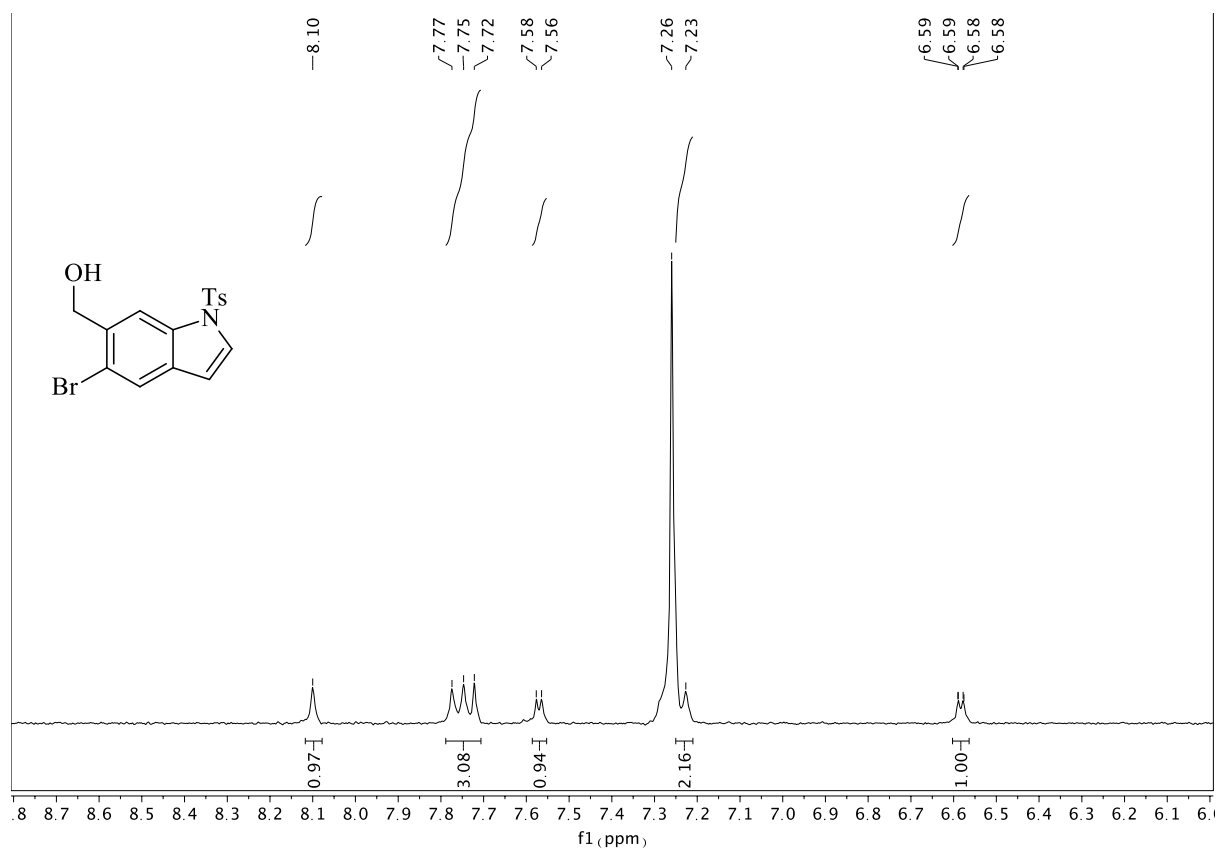

**<sup>1</sup>H NMR (300 MHz, CDCl<sub>3</sub>) Spectrum of Compound 10.**

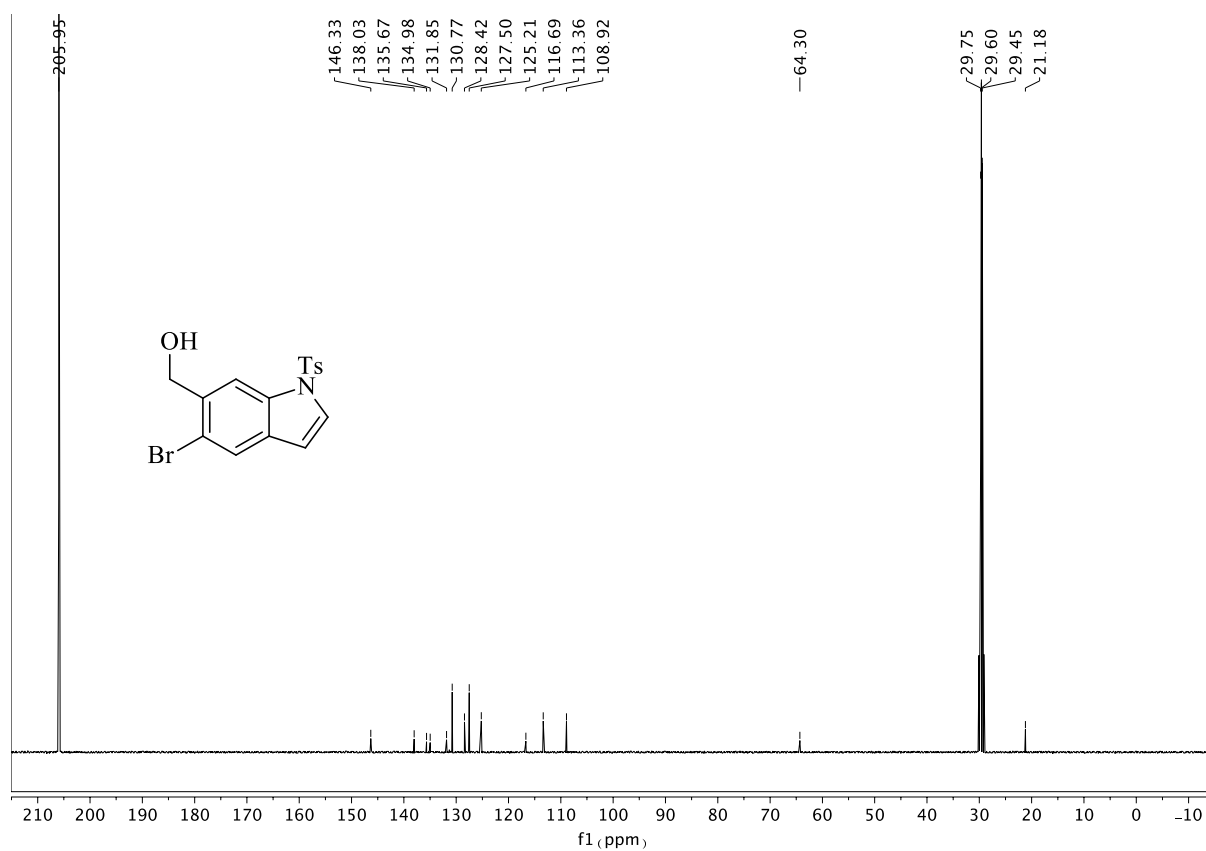

**<sup>13</sup>C NMR (126 MHz, d<sub>6</sub>-(CD<sub>3</sub>)<sub>2</sub>CO) Spectrum of Compound 10.**

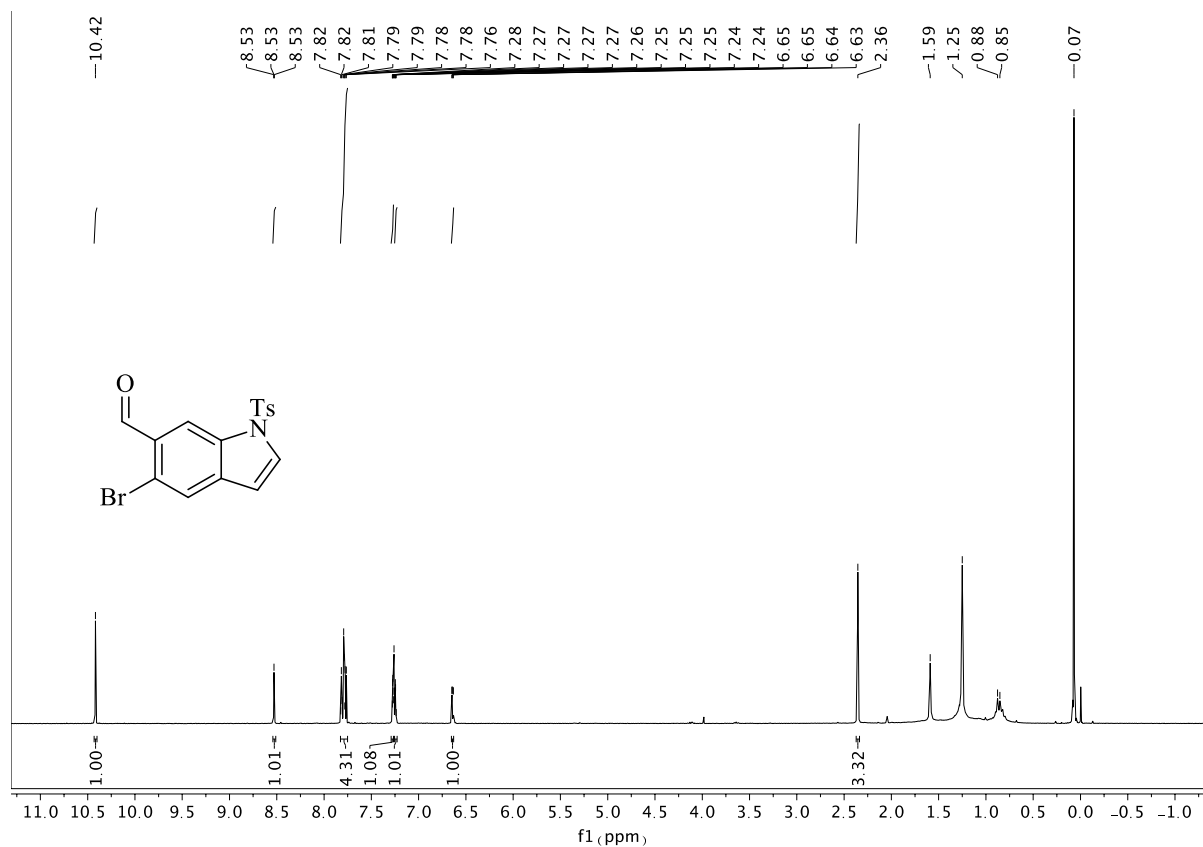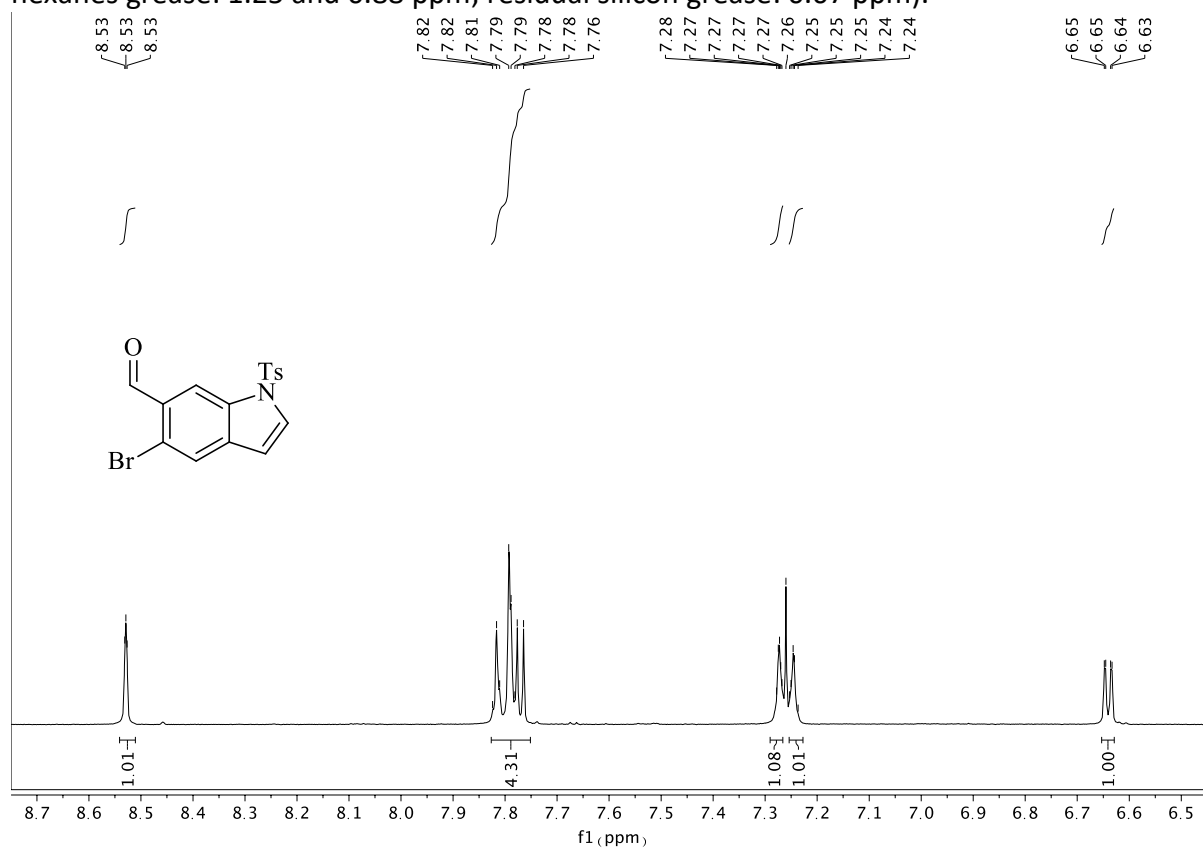

**<sup>1</sup>H NMR (300 MHz, CDCl<sub>3</sub>) Spectrum of Compound 11.**

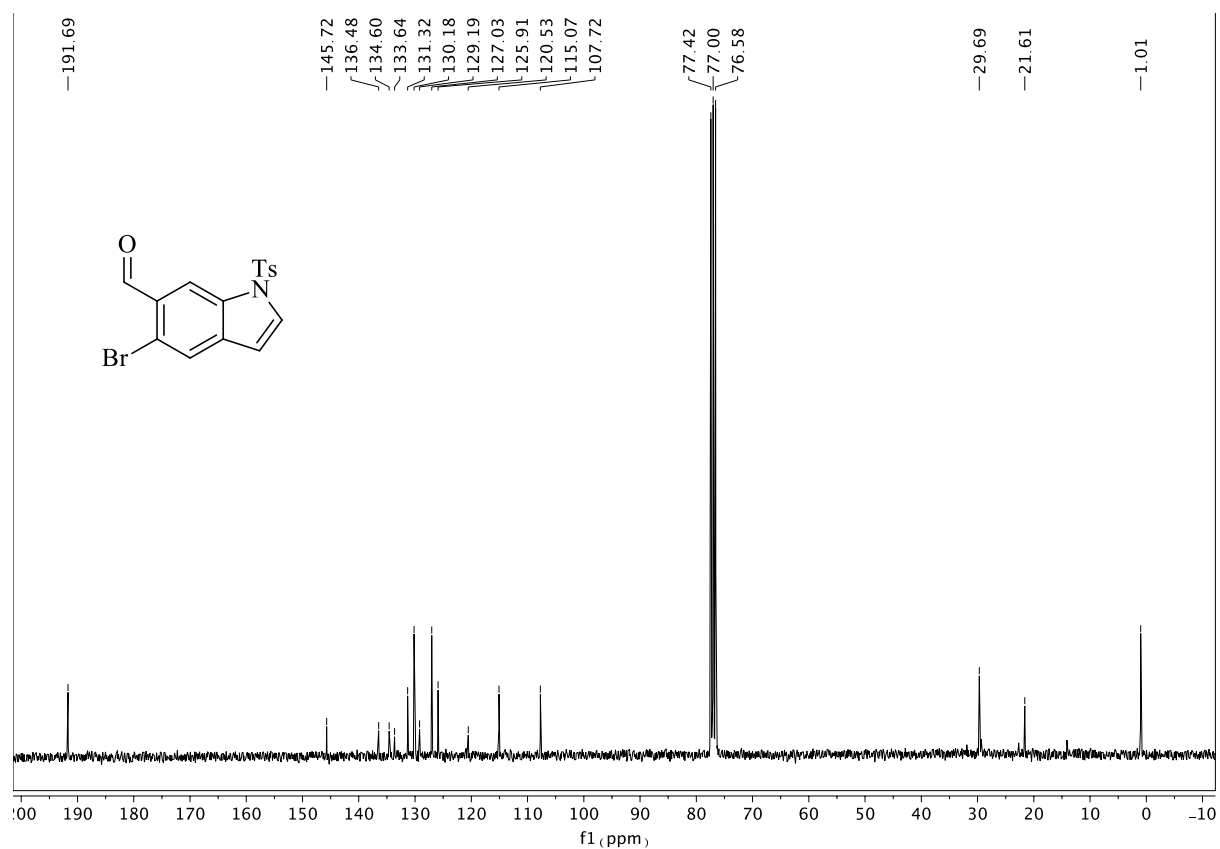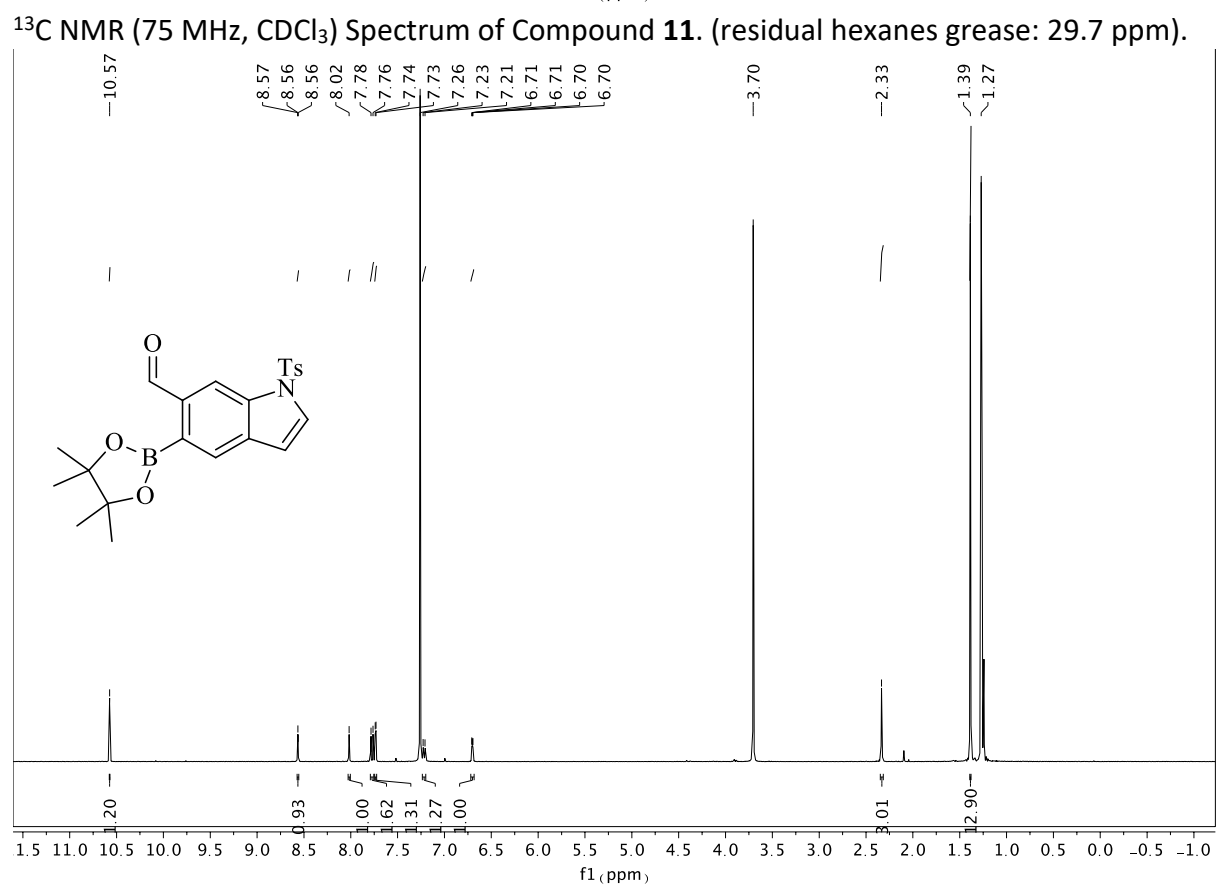

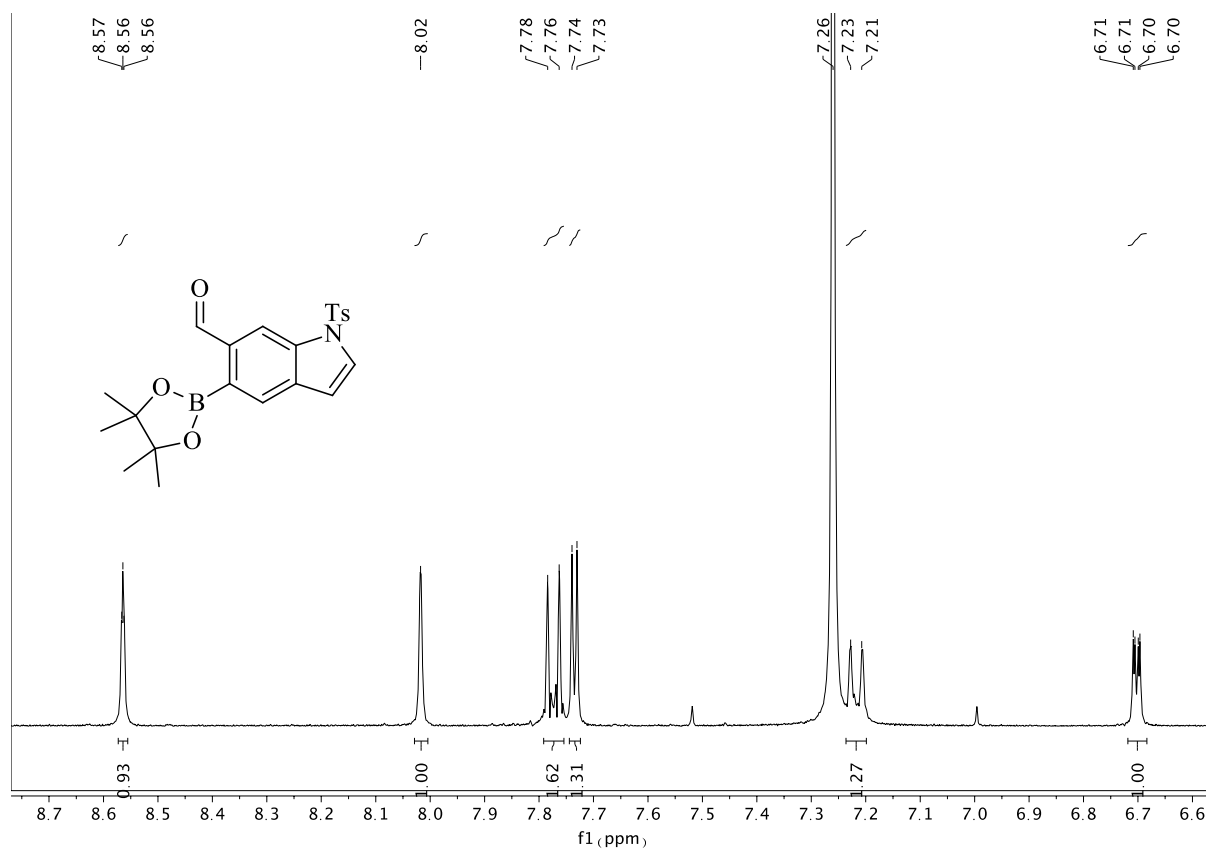

<sup>1</sup>H NMR (400 MHz, CDCl<sub>3</sub>) Spectrum of Compound **12**.

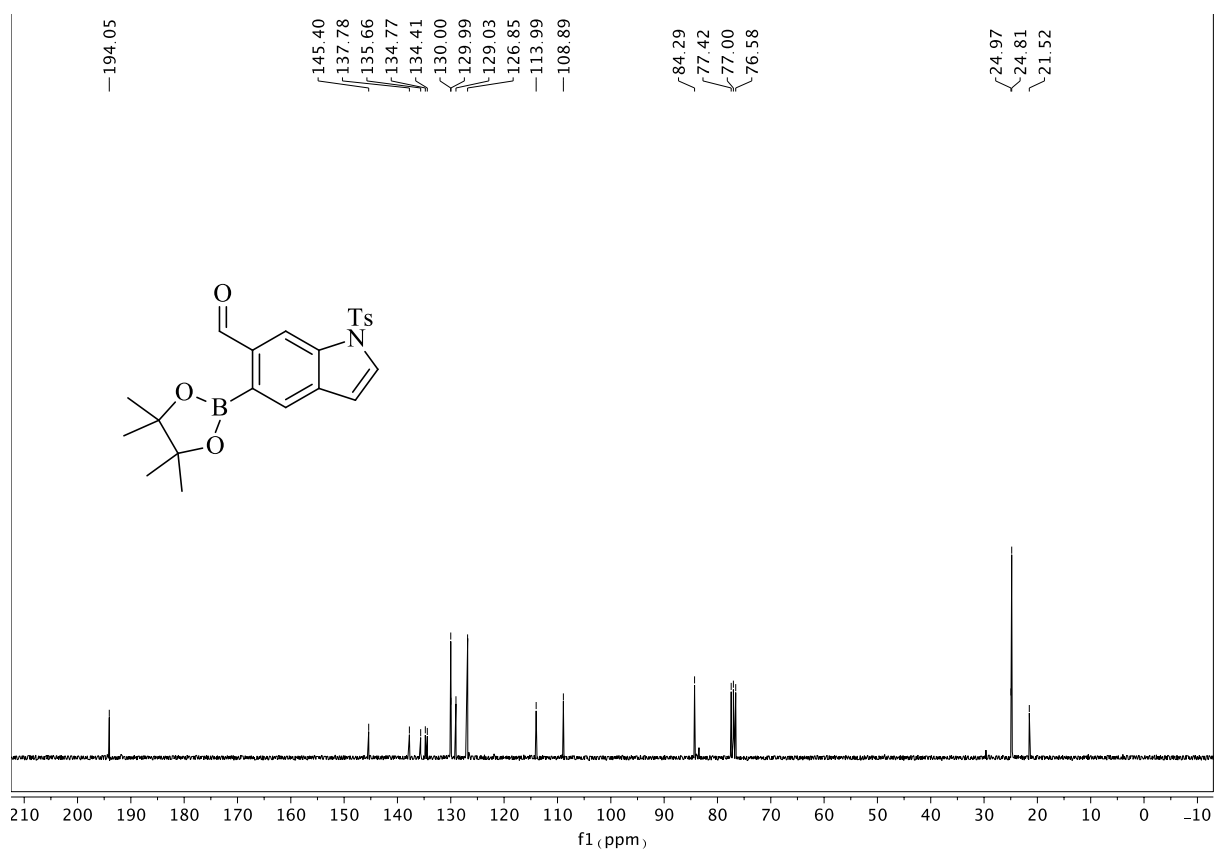

<sup>13</sup>C NMR (75 MHz, CDCl<sub>3</sub>) Spectrum of Compound **12**.

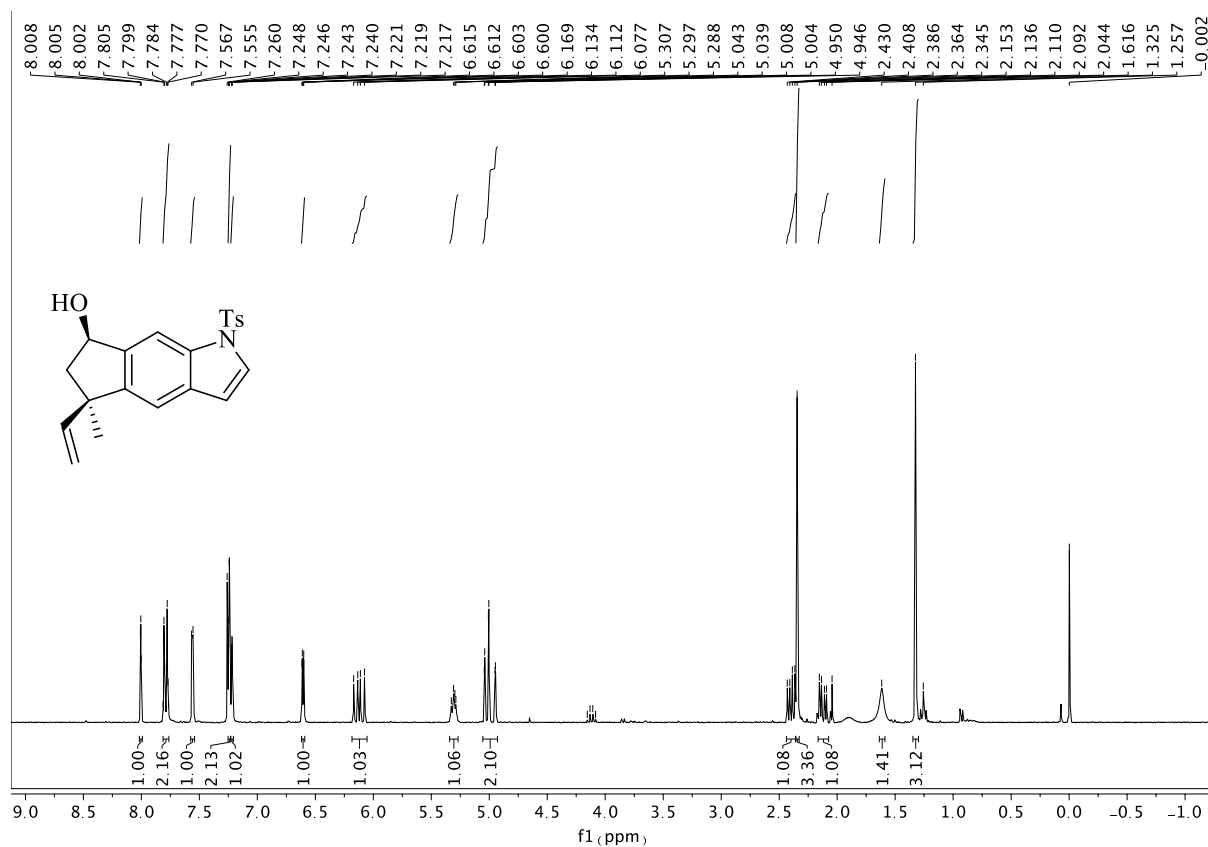

**<sup>1</sup>H NMR (300 MHz, CDCl<sub>3</sub>) Spectrum of Compound (+/-)-6. (AcOEt: 4.12, 2.5 and 1.26 ppm).**

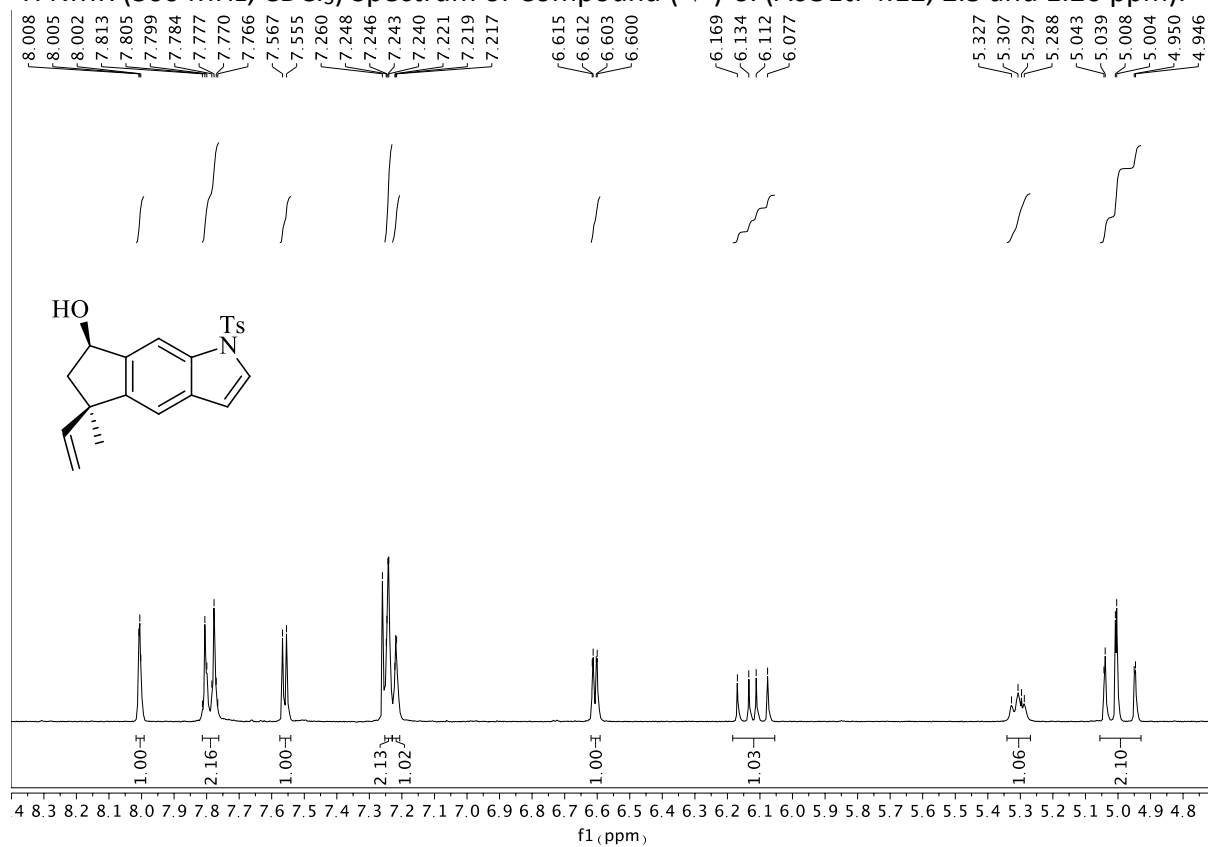

**<sup>1</sup>H NMR (300 MHz, CDCl<sub>3</sub>) Spectrum of Compound (+/-)-6.**

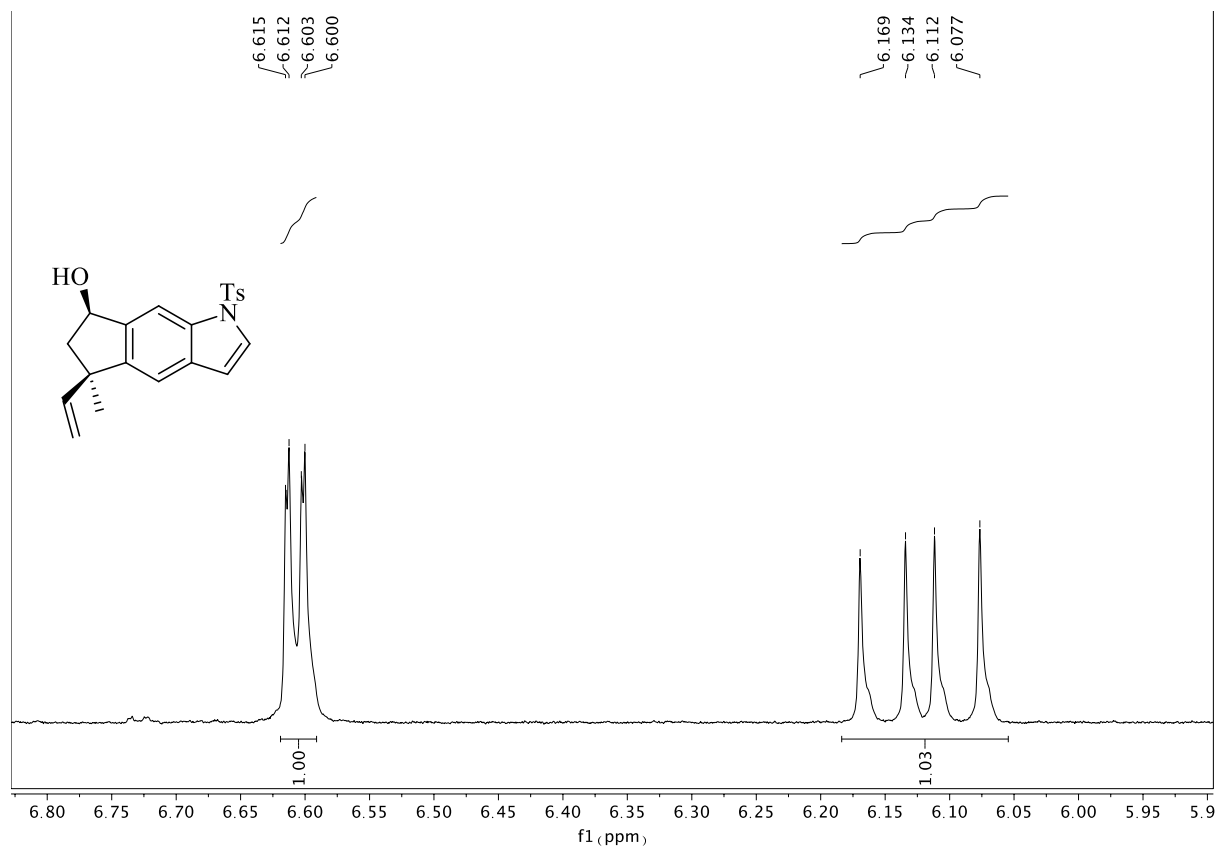

<sup>1</sup>H NMR (300 MHz, CDCl<sub>3</sub>) Spectrum of Compound (+/-)-6.

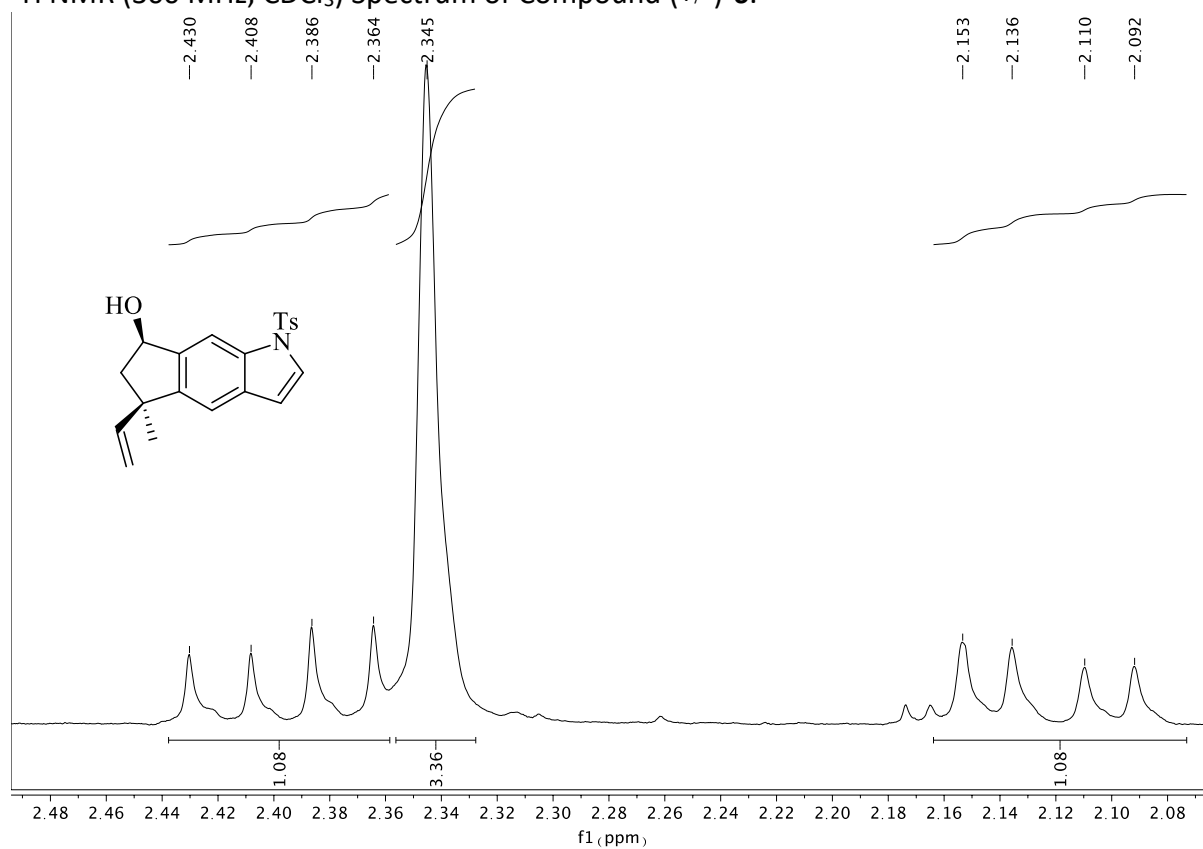

<sup>1</sup>H NMR (300 MHz, CDCl<sub>3</sub>) Spectrum of Compound (+/-)-6.

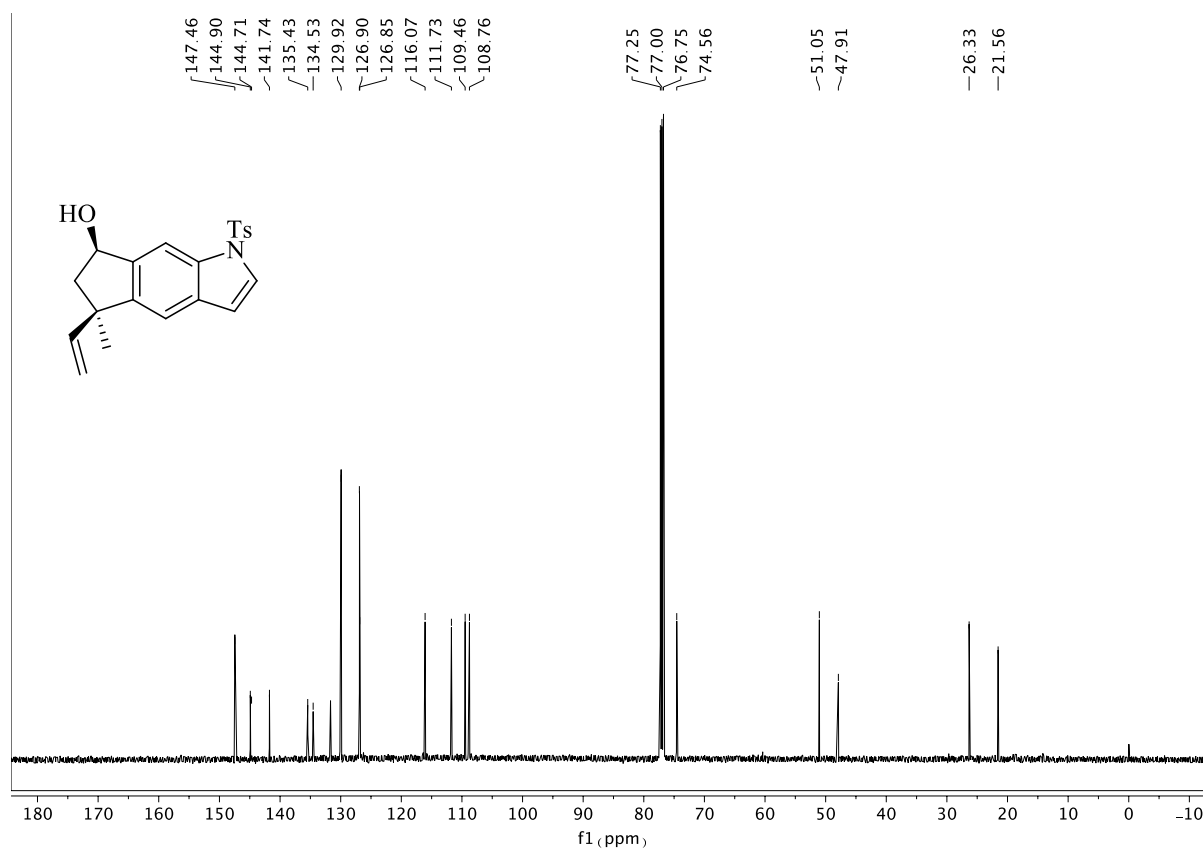

**<sup>13</sup>C NMR (126 MHz, CDCl<sub>3</sub>) Spectrum of Compound (+/-)-6.**

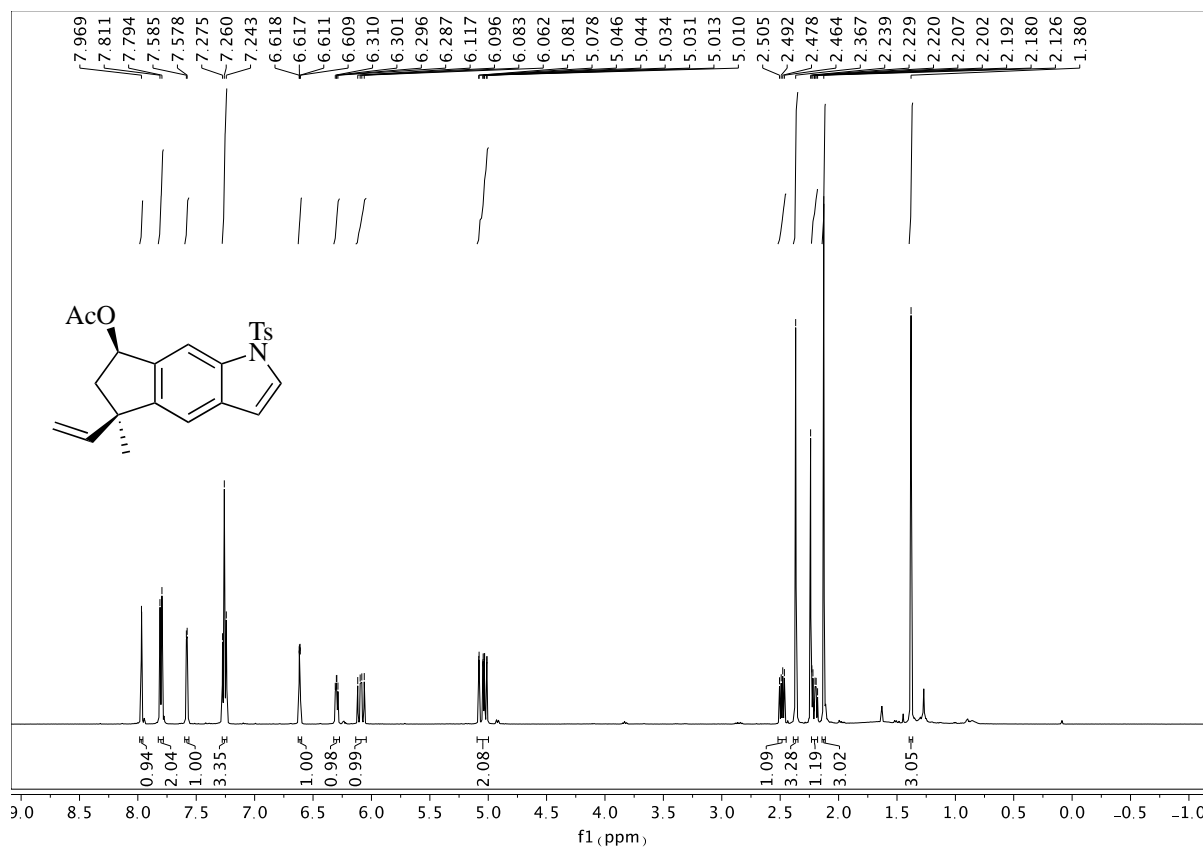

**<sup>1</sup>H NMR (500 MHz, CDCl<sub>3</sub>) Spectrum of Compound (+/-)-13.**



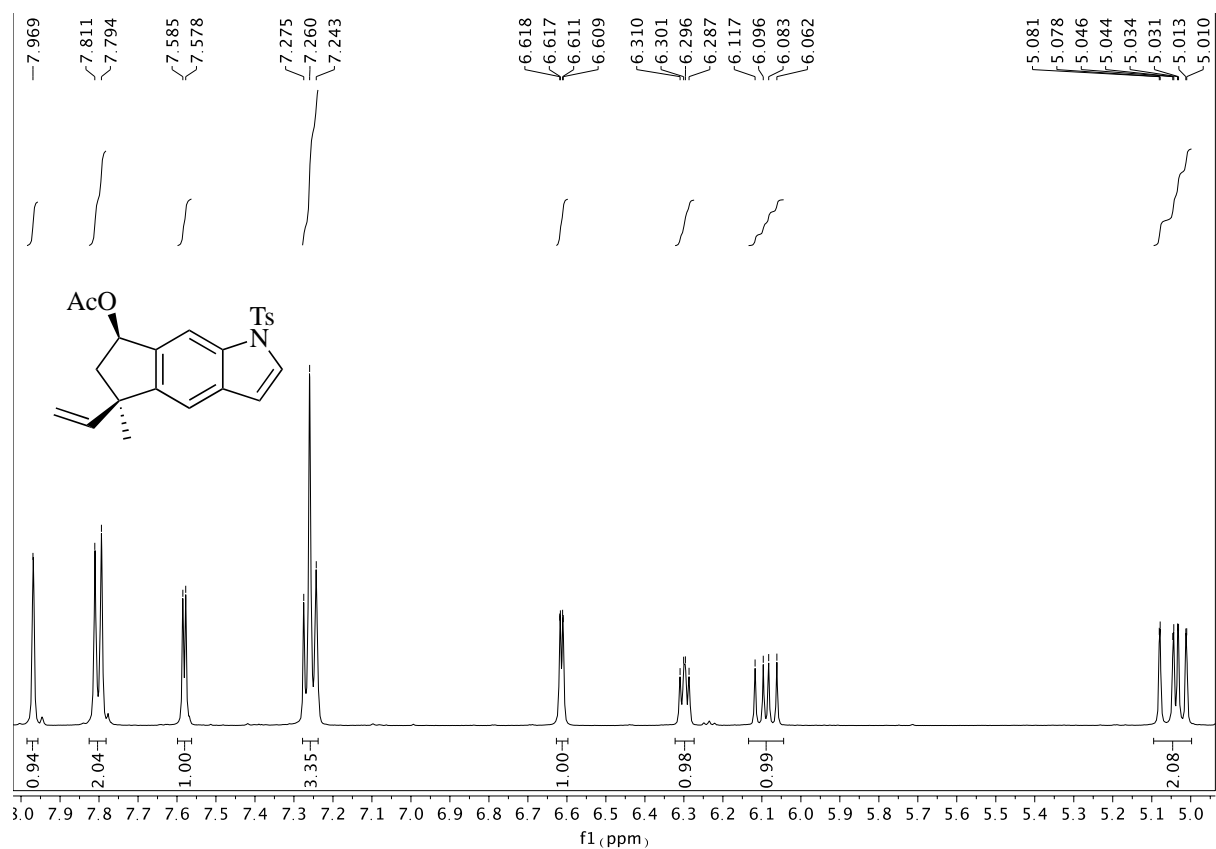

**<sup>1</sup>H NMR (500 MHz, CDCl<sub>3</sub>) Spectrum of Compound (+/-)-13.**

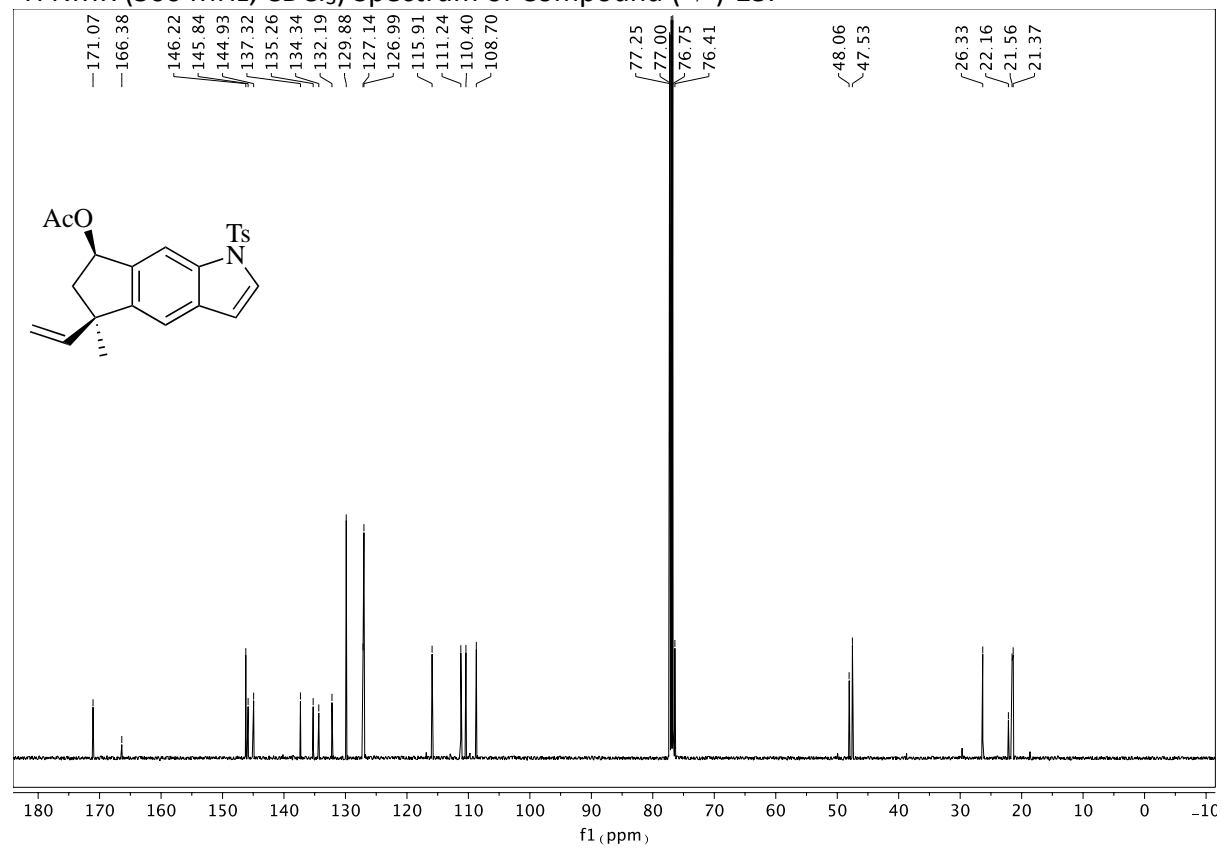

**<sup>13</sup>C NMR (126 MHz, CDCl<sub>3</sub>) Spectrum of Compound (+/-)-13. (*N,N*-DMA: 171.07 and 21.37).**

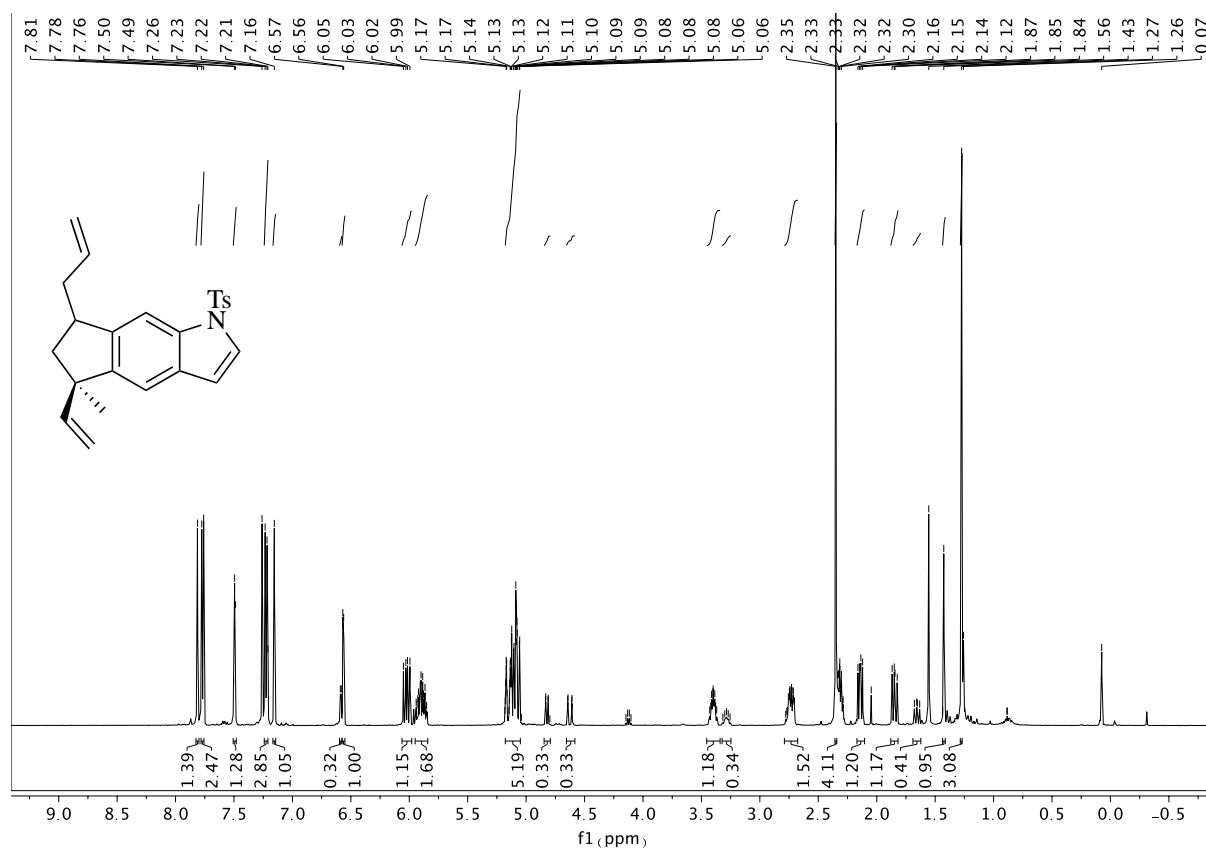

<sup>1</sup>H NMR (500 MHz, CDCl<sub>3</sub>) Spectrum of a mixture **1a:1b**. (AcOEt: 4.12, 2.5 and 1.26 ppm).

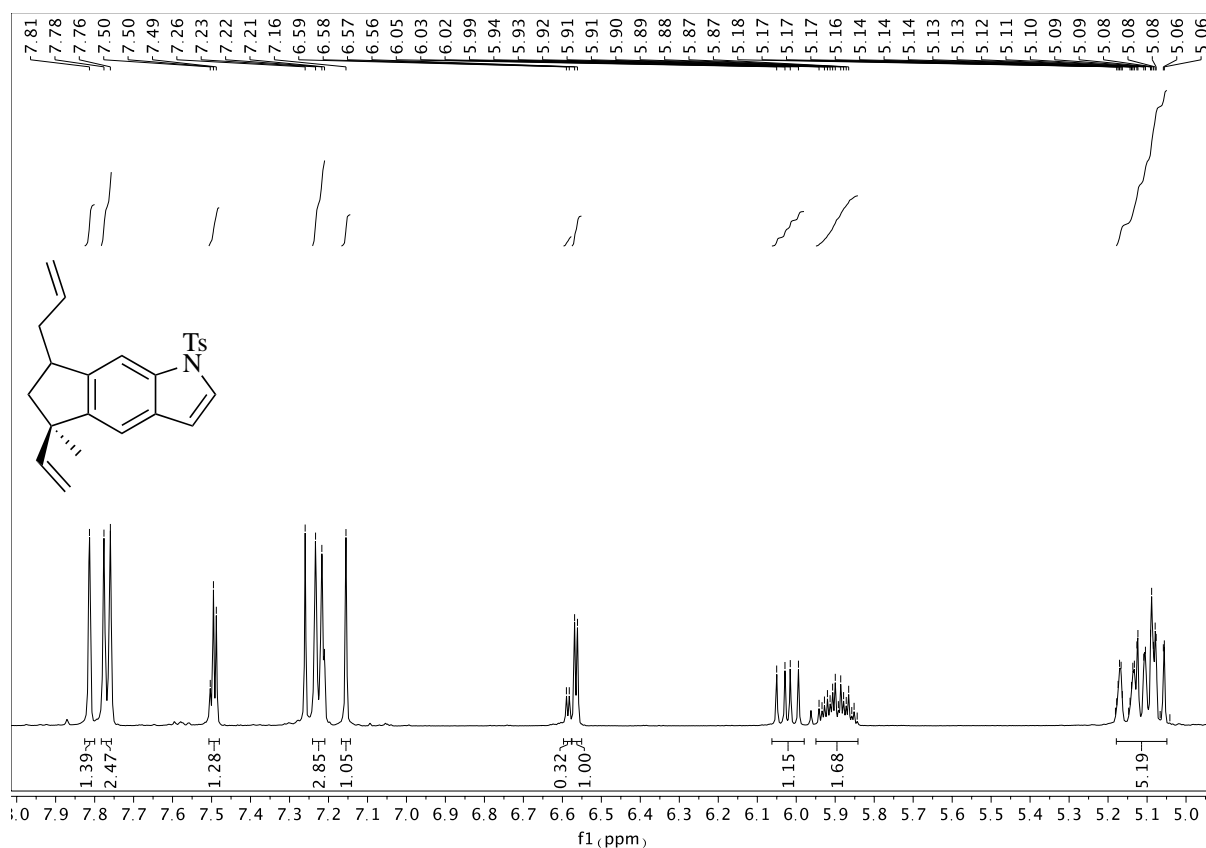

<sup>1</sup>H NMR (500 MHz, CDCl<sub>3</sub>) Spectrum of a mixture **1a:1b**. (AcOEt: 4.12, 2.5 and 1.26 ppm).

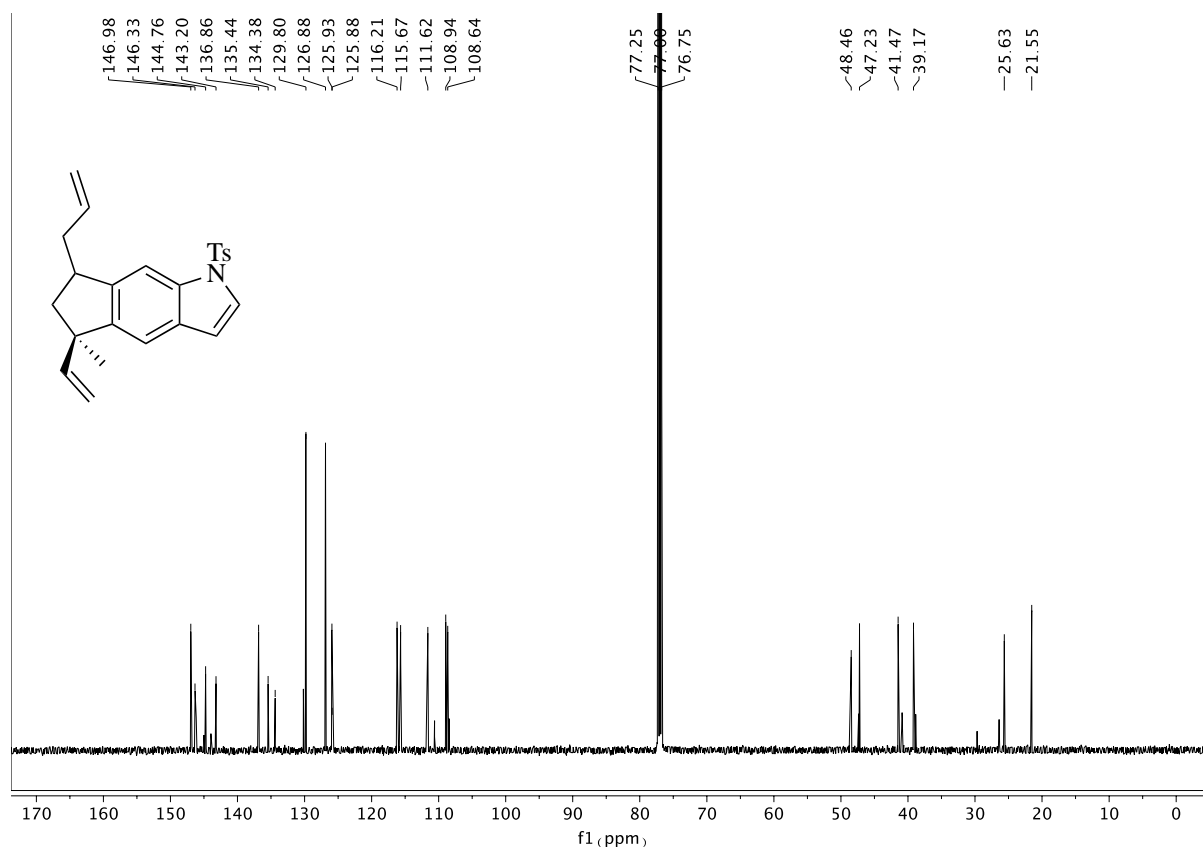

<sup>13</sup>C NMR (126 MHz, CDCl<sub>3</sub>) Spectrum of a mixture **1a**:**1b**.

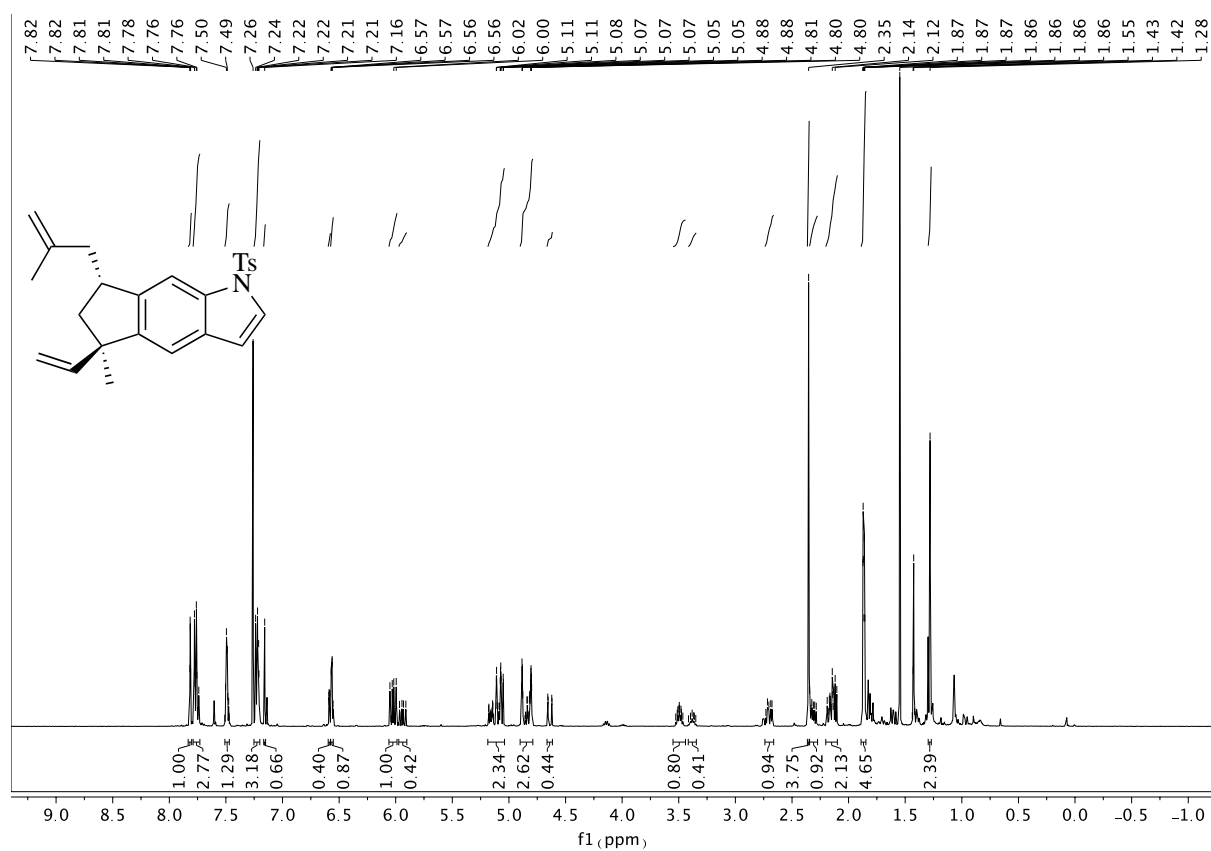

<sup>1</sup>H NMR (500 MHz, CDCl<sub>3</sub>) Spectrum of a mixture (5*R*,7*S*)-**1a**:(5*R*,7*R*)-**1b** (1:2 ratio).  
(residual hexanes grease: 1.26 and 0.8 ppm; residual water: 1.55 ppm).

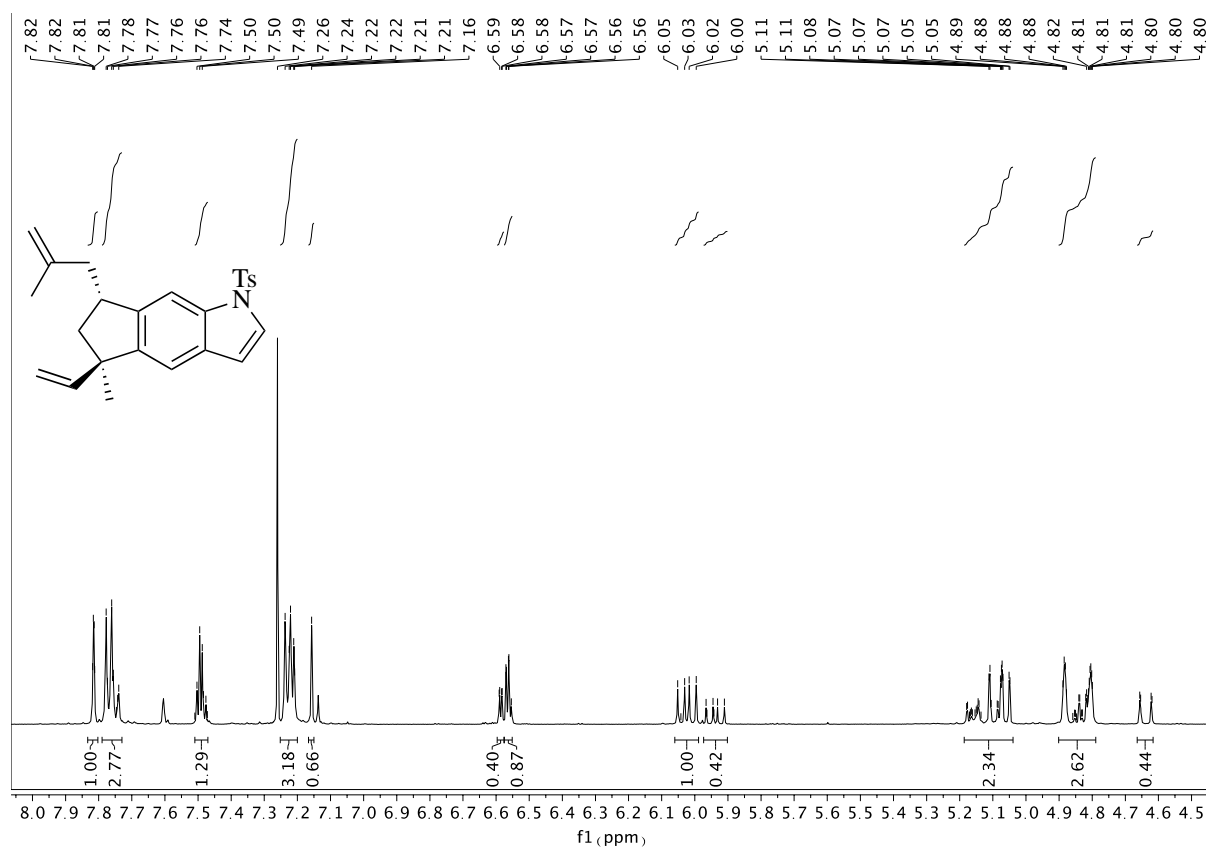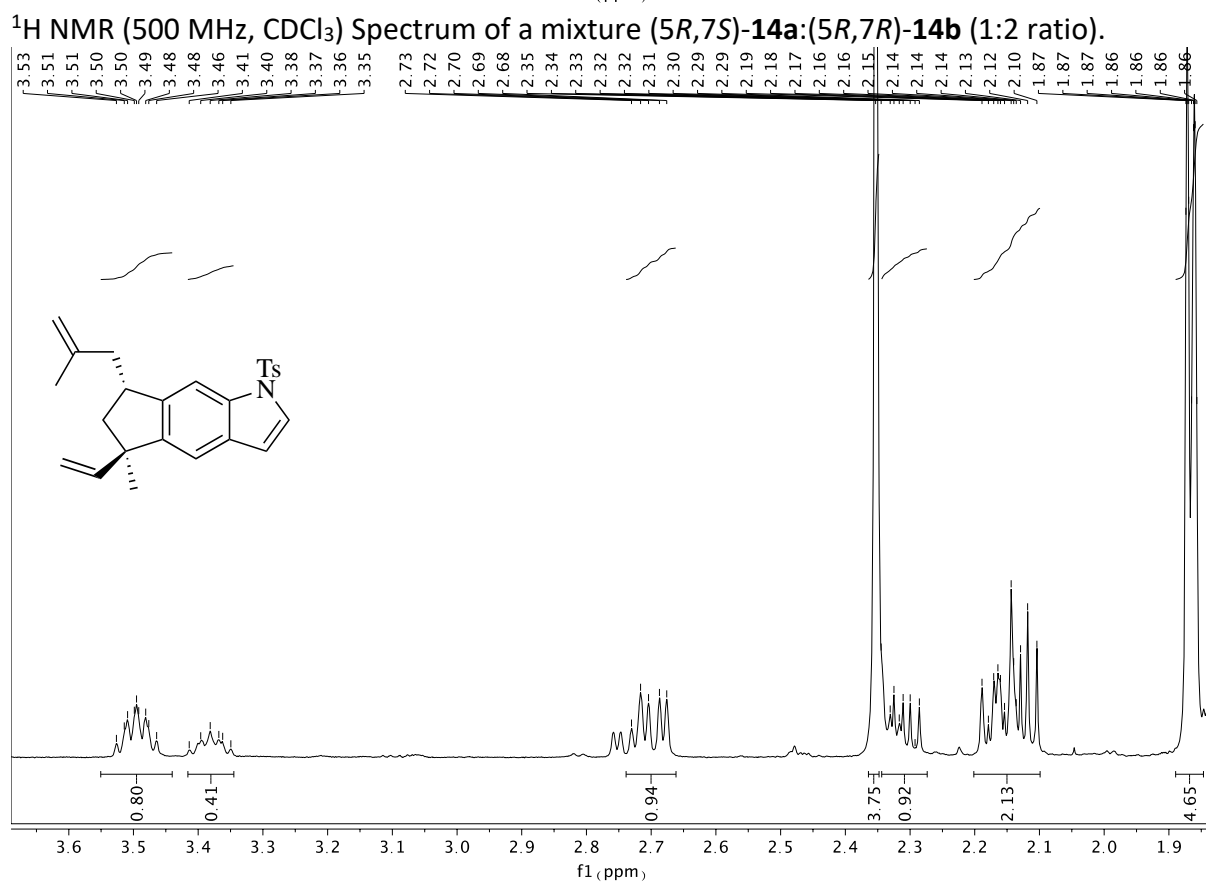

$^1\text{H}$  NMR (500 MHz,  $\text{CDCl}_3$ ) Spectrum of a mixture (5*R*,7*S*)-**14a**:(5*R*,7*R*)-**14b** (1:2 ratio).

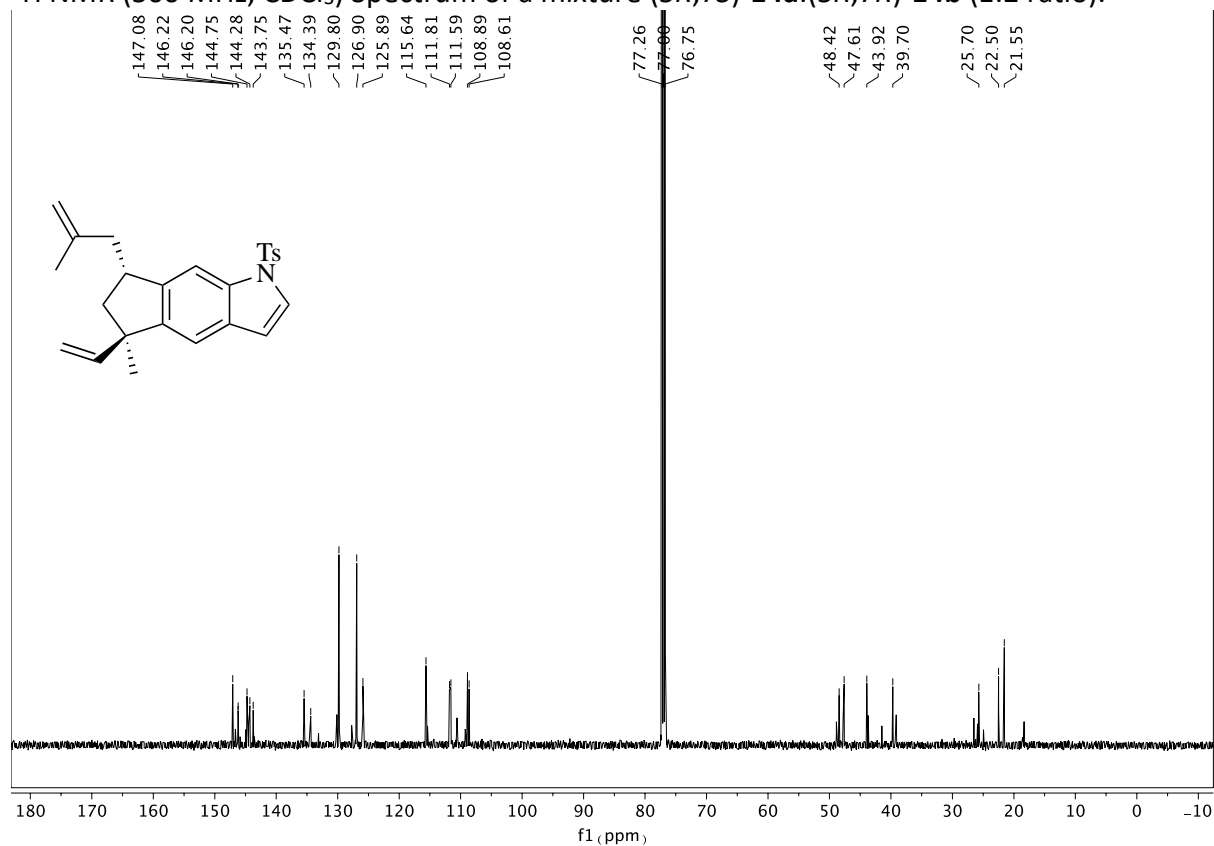

$^{13}\text{C}$  NMR (126 MHz,  $\text{CDCl}_3$ ) Spectrum of a mixture (5*R*,7*S*)-**14a**:(5*R*,7*R*)-**14b** (1:2 ratio).

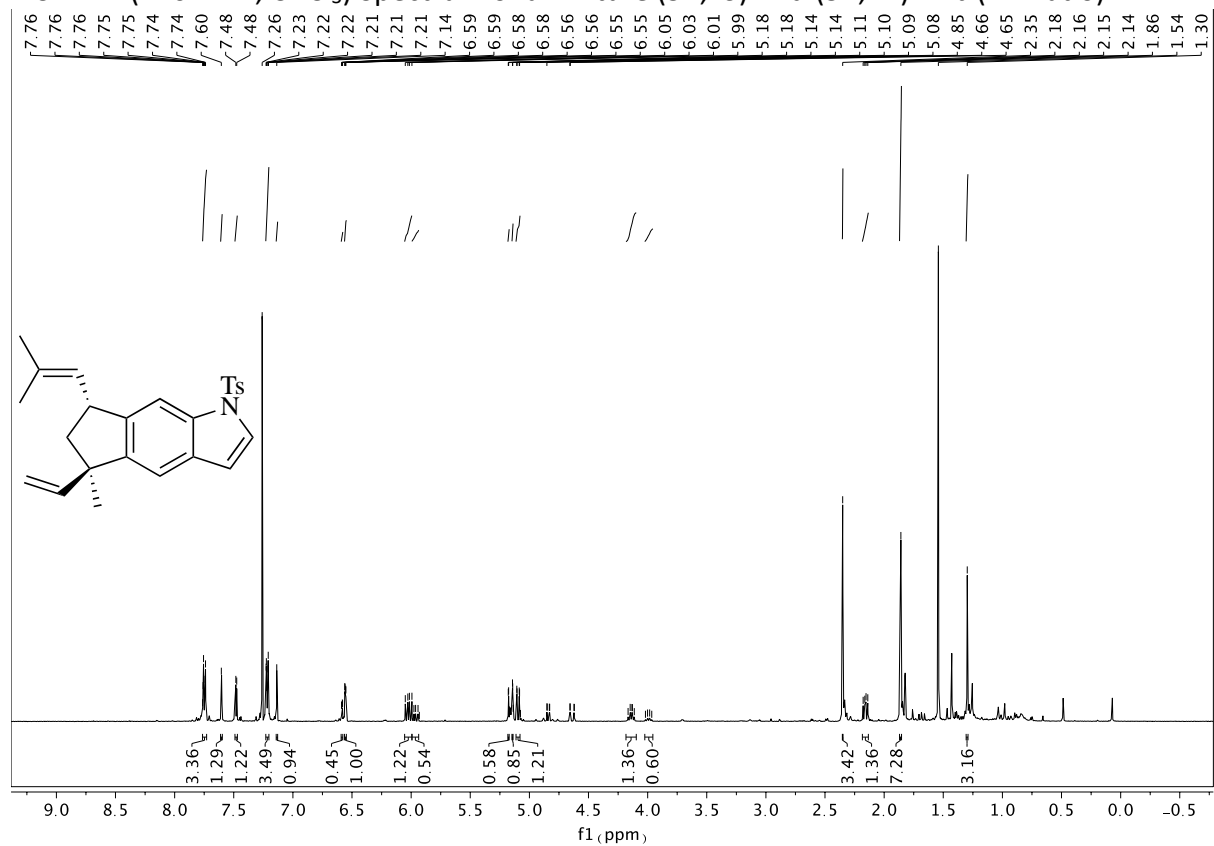

$^1\text{H}$  NMR (500 MHz,  $\text{CDCl}_3$ ) Spectrum of a mixture (5*R*,7*R*)-**18a**:(5*R*,7*S*)-**18b** (1:2 ratio). (Obs.: spectrum with traces of starting material).

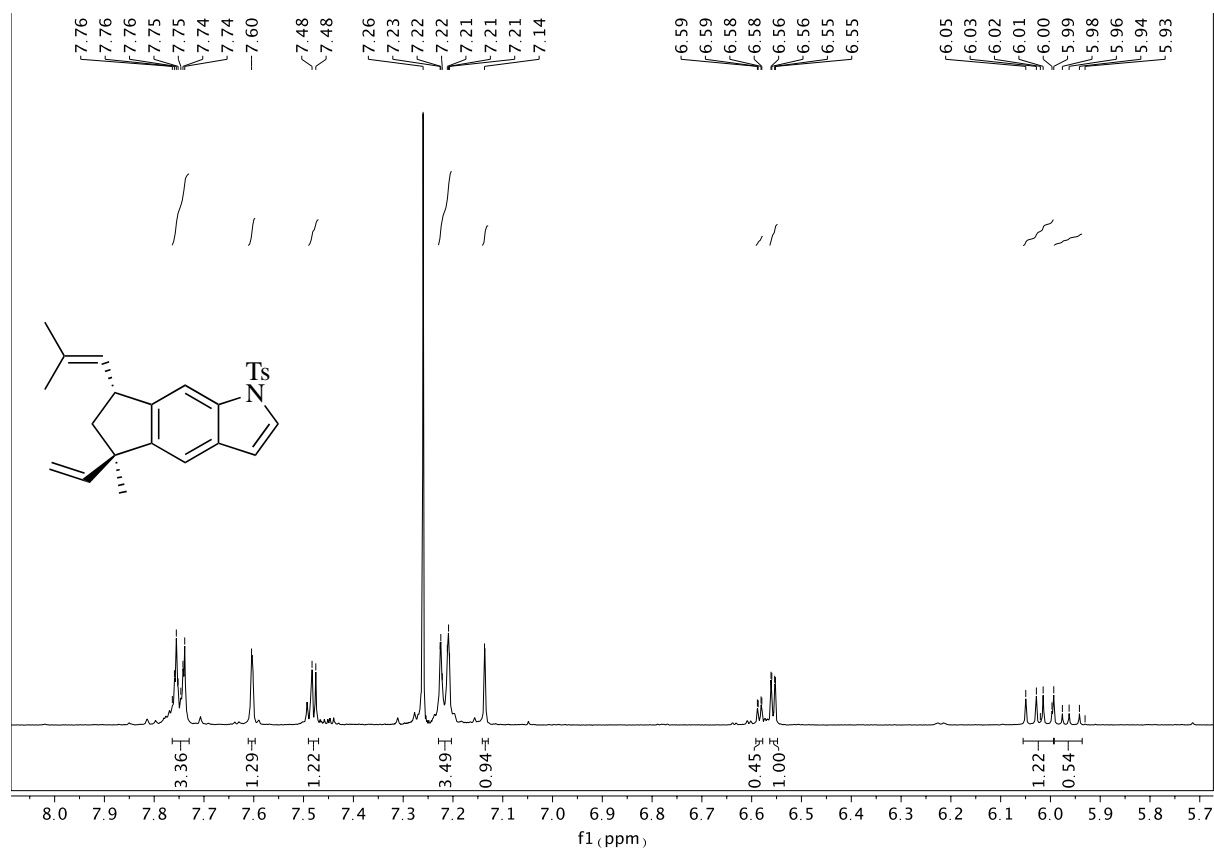

**<sup>1</sup>H NMR (500 MHz, CDCl<sub>3</sub>) Spectrum of a mixture (5*R*,7*R*)-**18a**:(5*R*,7*S*)-**18b** (1:2 ratio).**

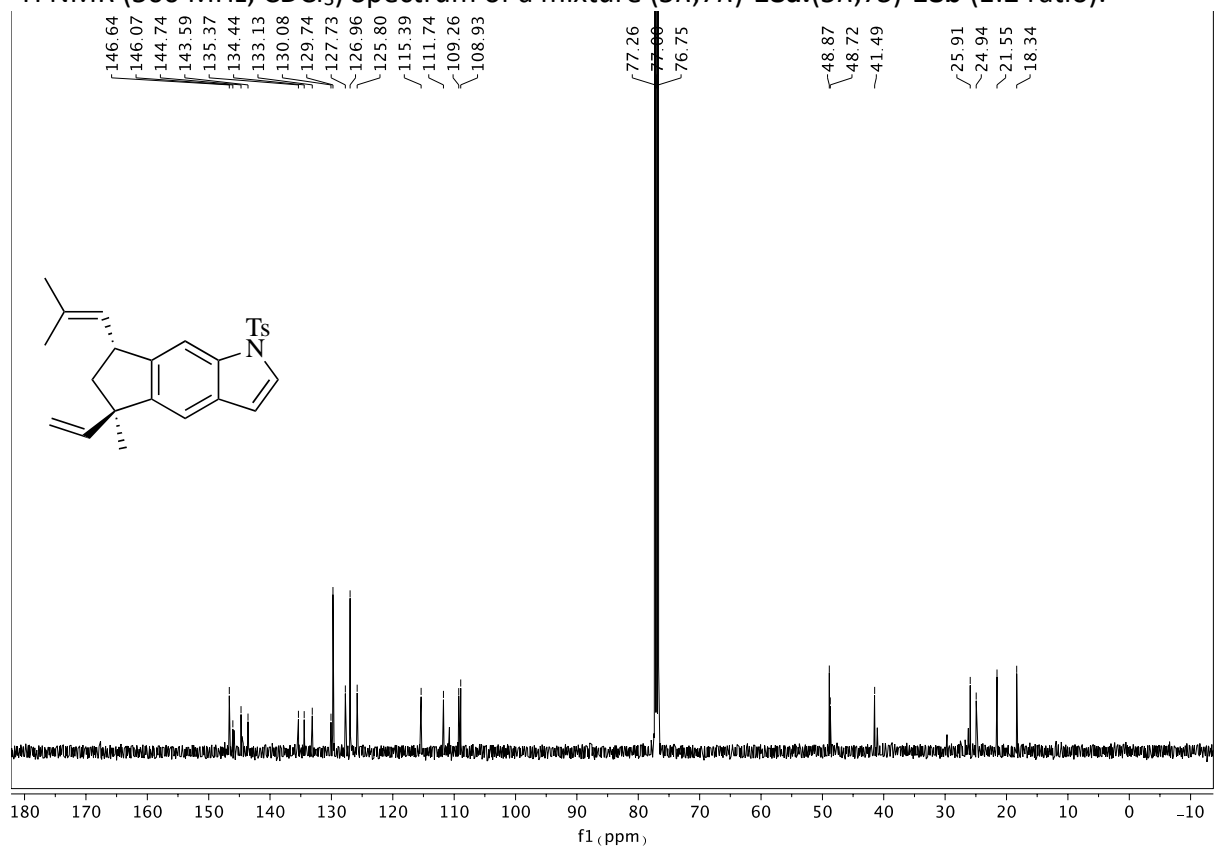

**<sup>13</sup>C NMR (126 MHz, CDCl<sub>3</sub>) Spectrum of a mixture (5*R*,7*R*)-**18a**:(5*R*,7*S*)-**18b** (1:2 ratio).**

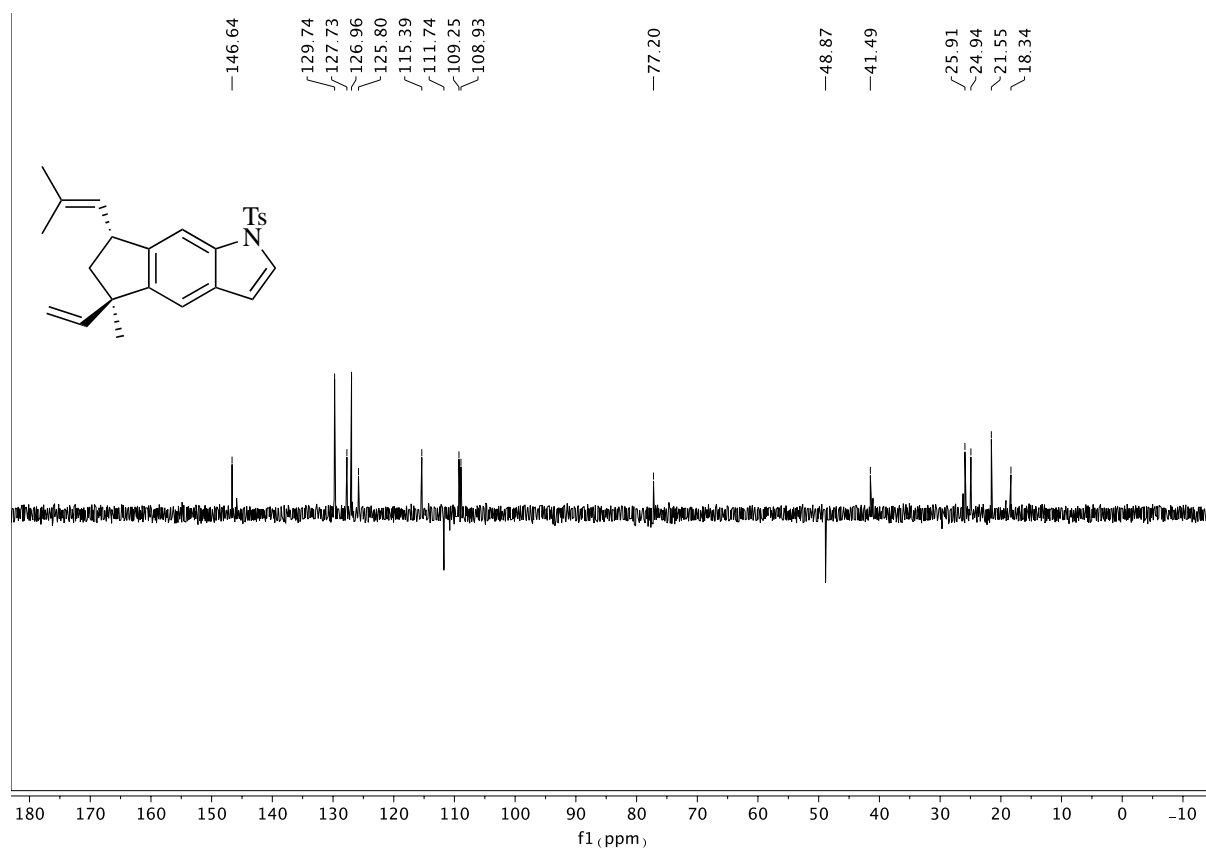

DEPT135 (126 MHz, CDCl<sub>3</sub>) Spectrum of a mixture (5*R*,7*R*)-**18a**:(5*R*,7*S*)-**18b** (1:2 ratio).

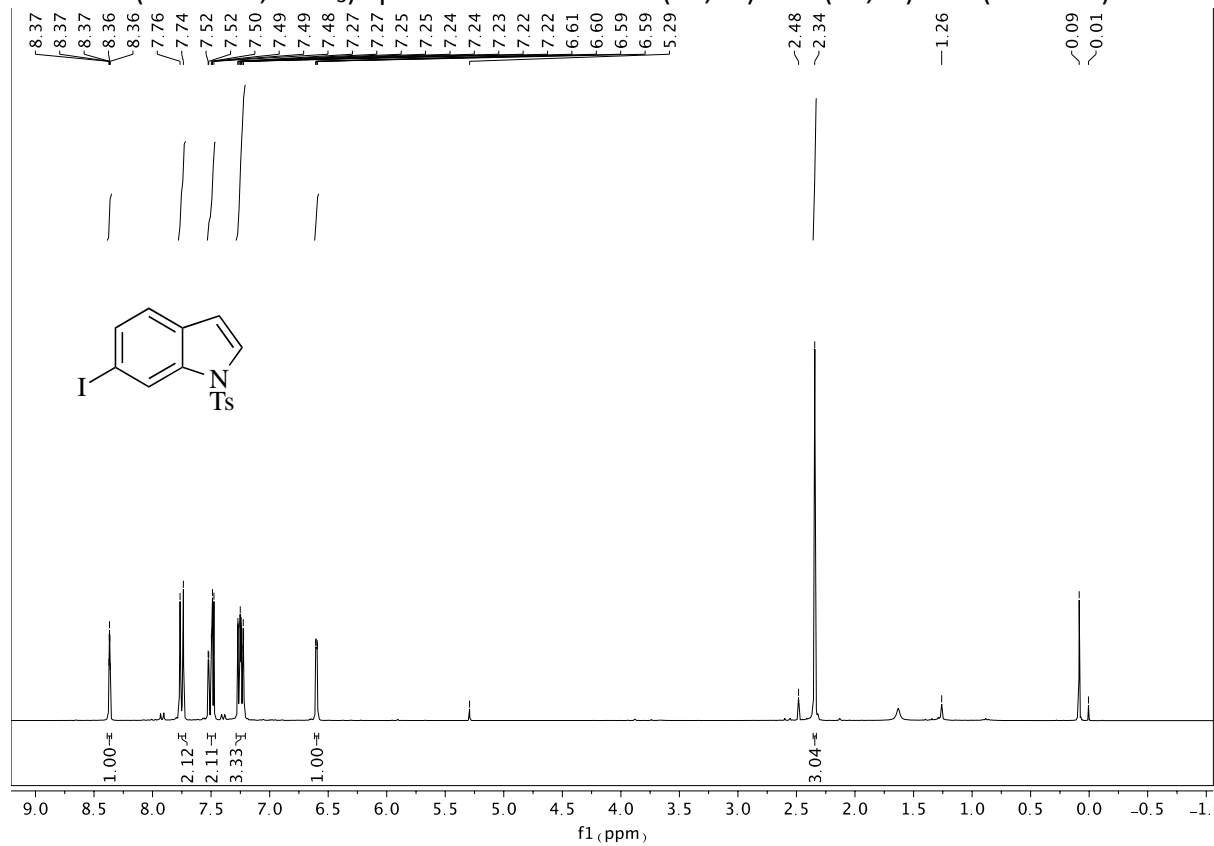

<sup>1</sup>H NMR (300 MHz, CDCl<sub>3</sub>) Spectrum of compound **17**. (DCM: 5.27 ppm and TsCl impurity).

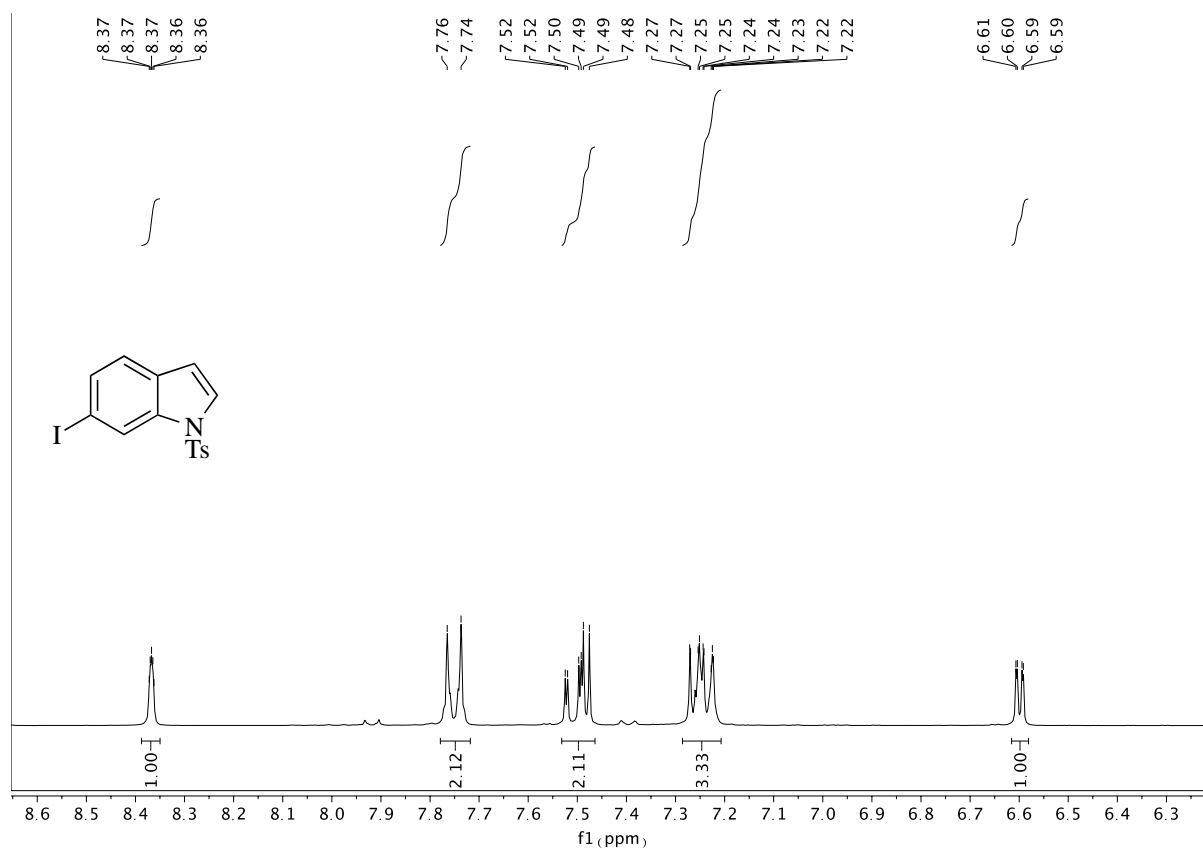

**<sup>1</sup>H NMR (300 MHz, CDCl<sub>3</sub>) Spectrum of compound 17.**

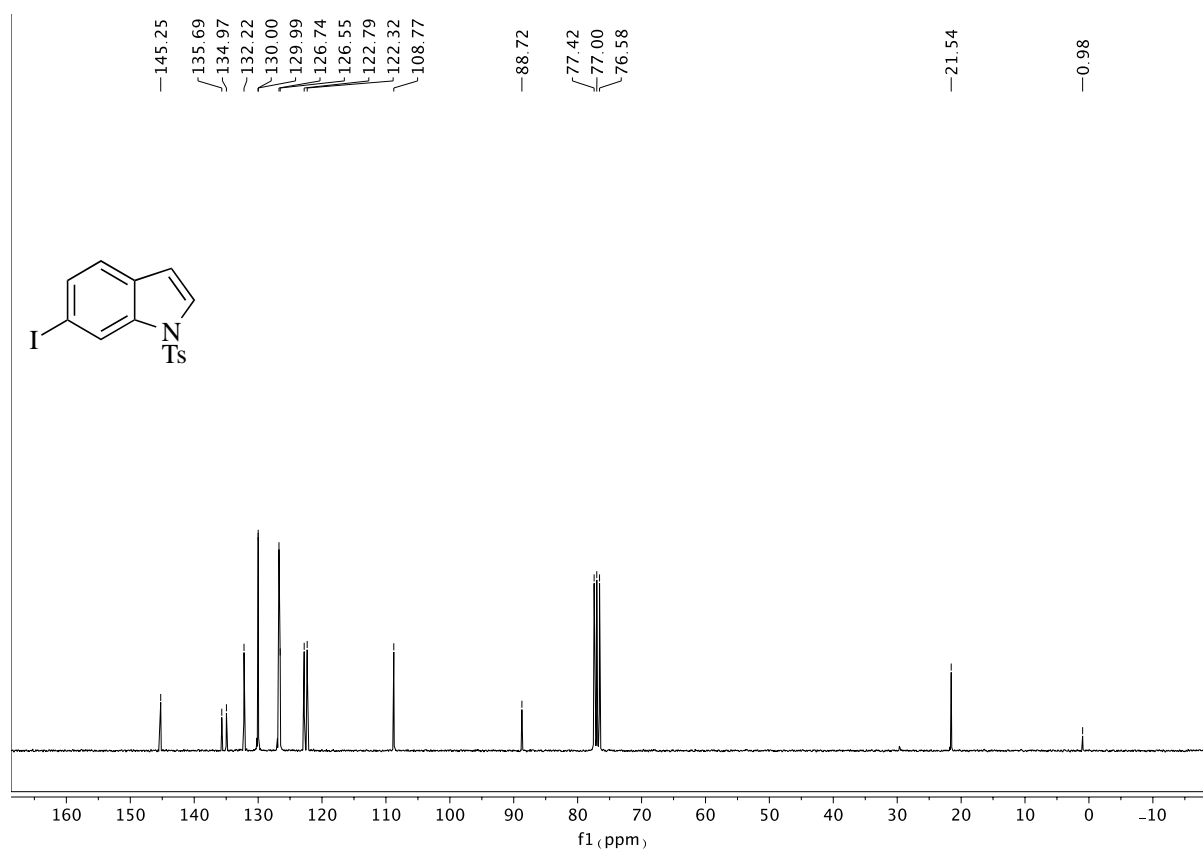

**<sup>13</sup>C NMR (75 MHz, CDCl<sub>3</sub>) Spectrum of Compound 17.**



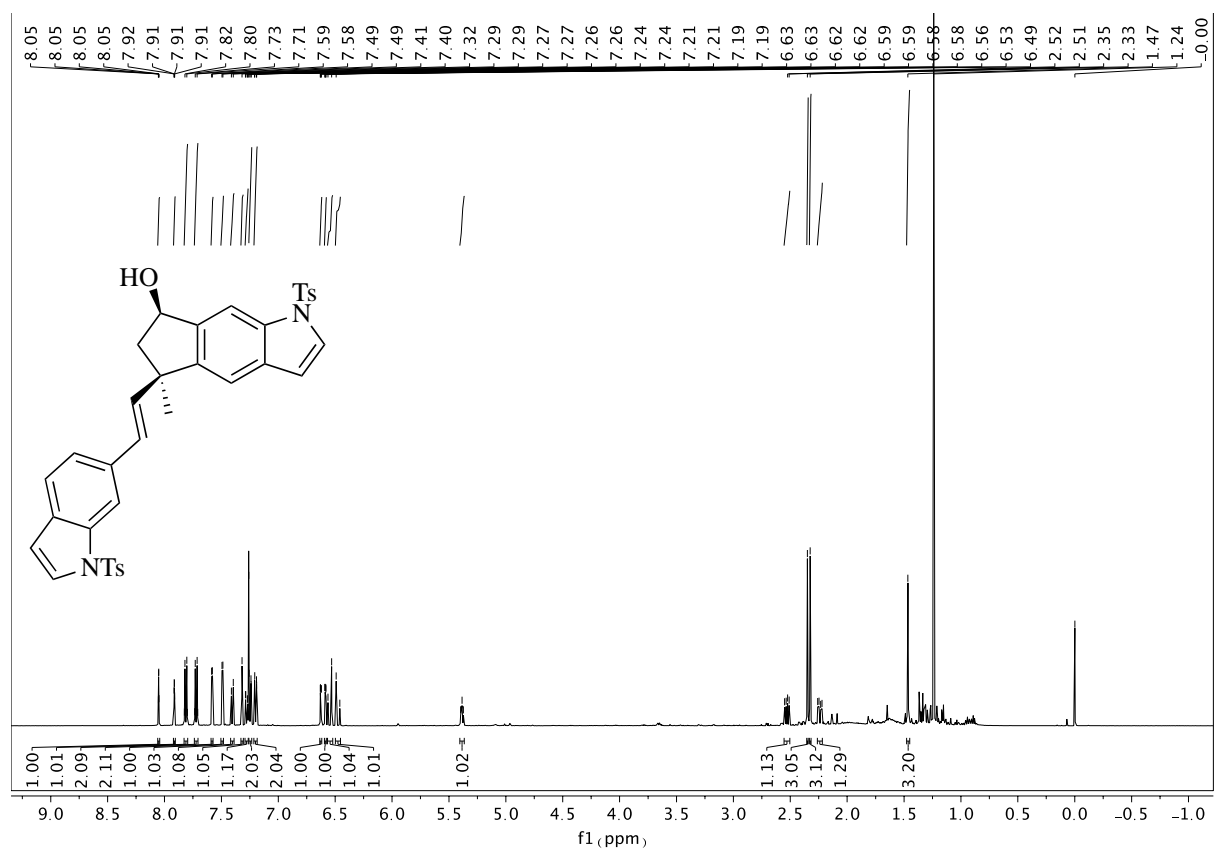

<sup>1</sup>H NMR (500 MHz, CDCl<sub>3</sub>) Spectrum of compound **15**.

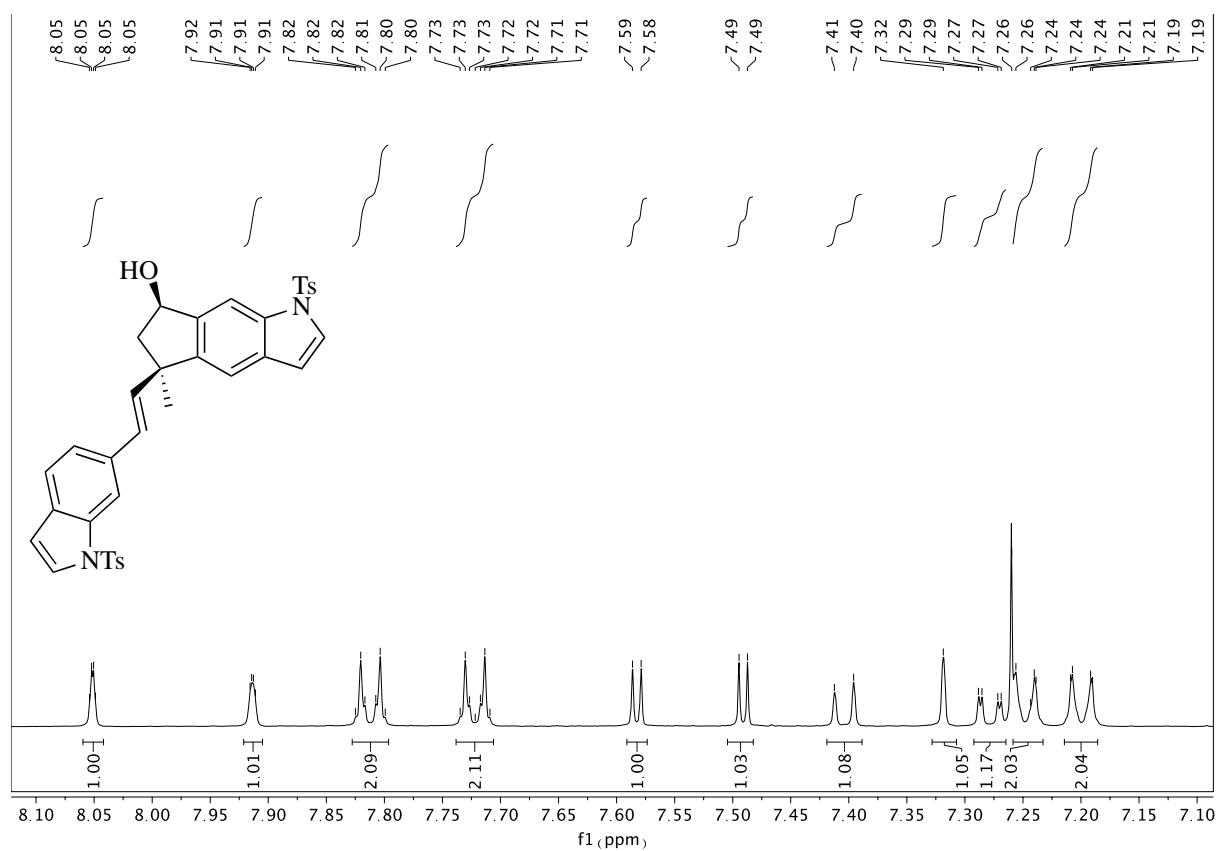

<sup>1</sup>H NMR (500 MHz, CDCl<sub>3</sub>) Spectrum of compound **15**.

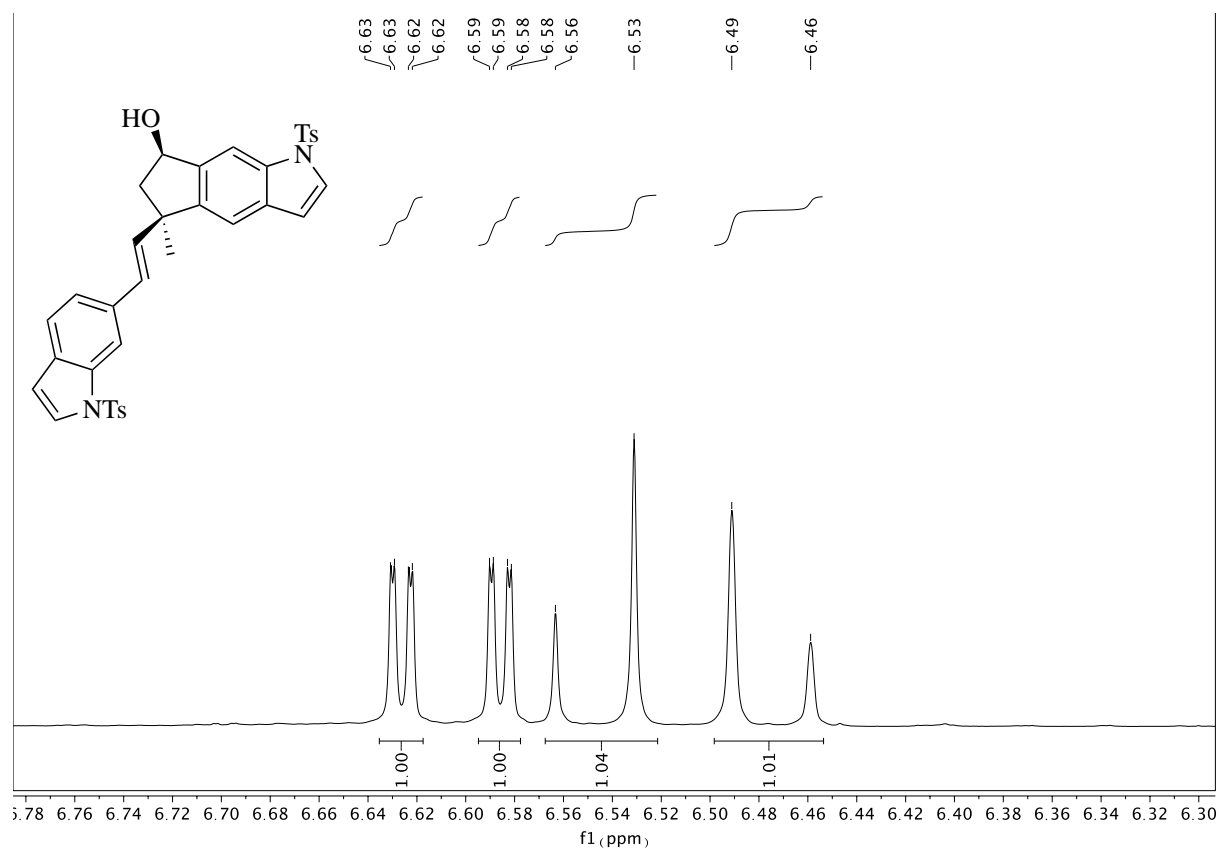

$^1\text{H}$  NMR (500 MHz,  $\text{CDCl}_3$ ) Spectrum of compound **15**.

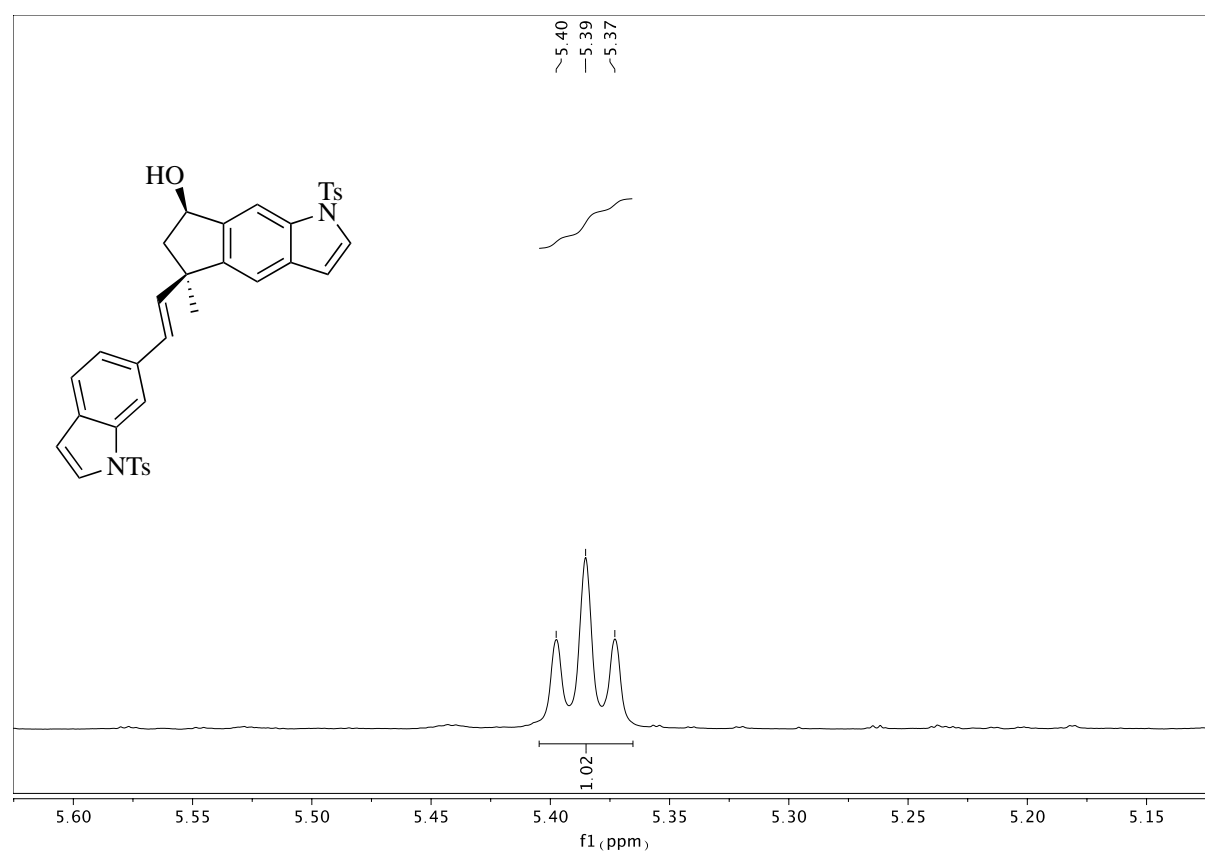

$^1\text{H}$  NMR (500 MHz,  $\text{CDCl}_3$ ) Spectrum of compound **15**.

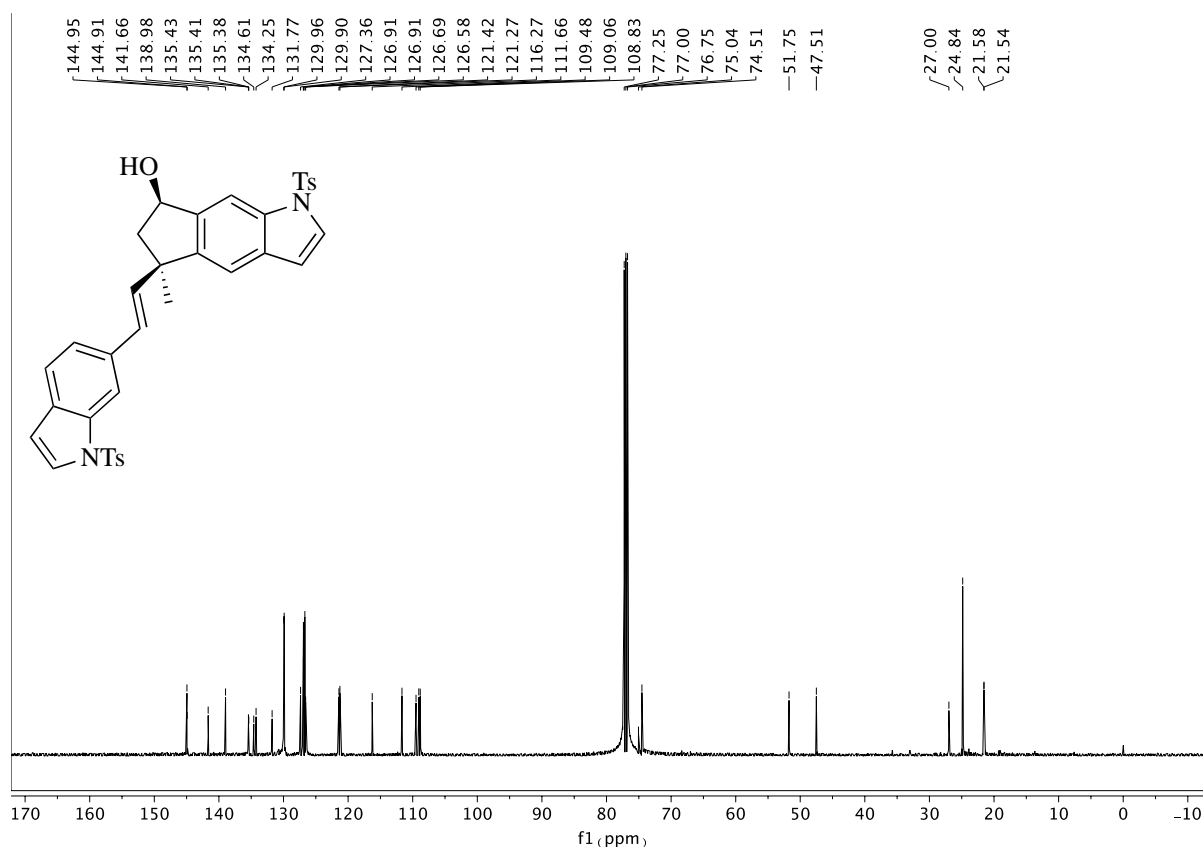

$^{13}\text{C}$  NMR (126 MHz,  $\text{CDCl}_3$ ) Spectrum of Compound 15.

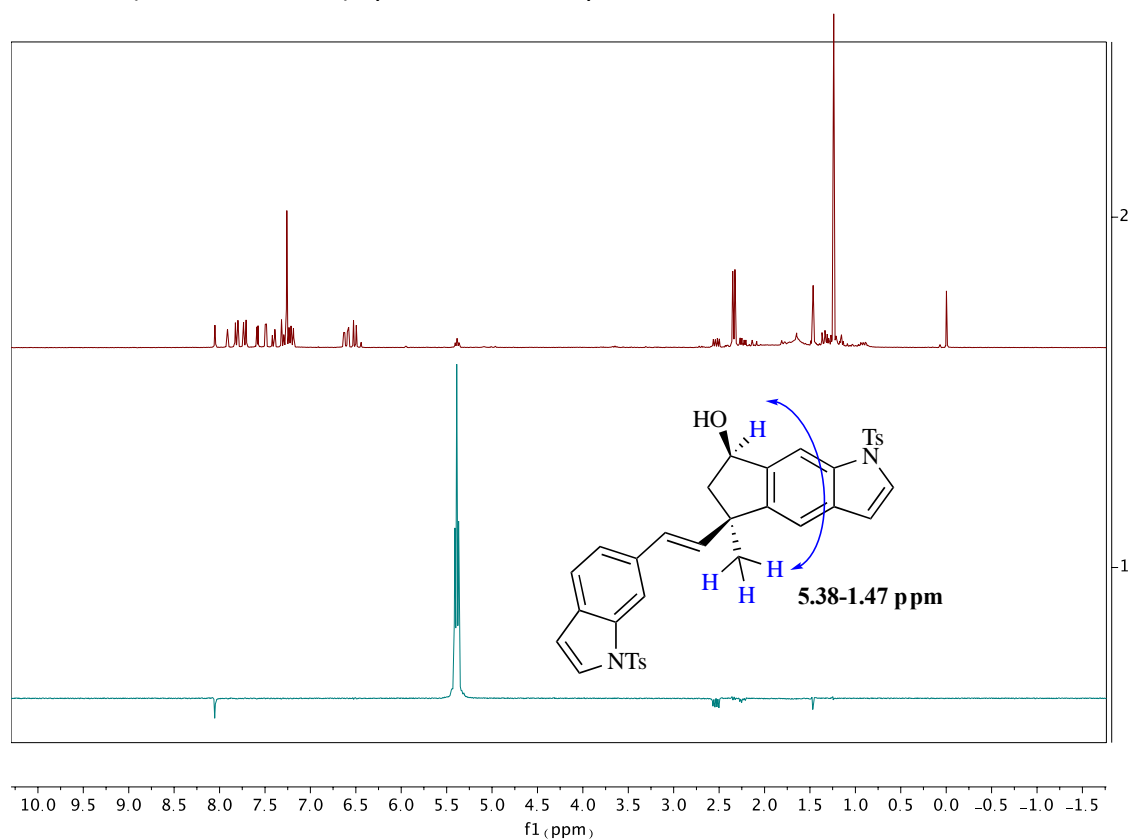

NOE 1D NMR (300 MHz,  $\text{CDCl}_3$ ) Spectrum of compound 15. (irradiation: 5.38 ppm).

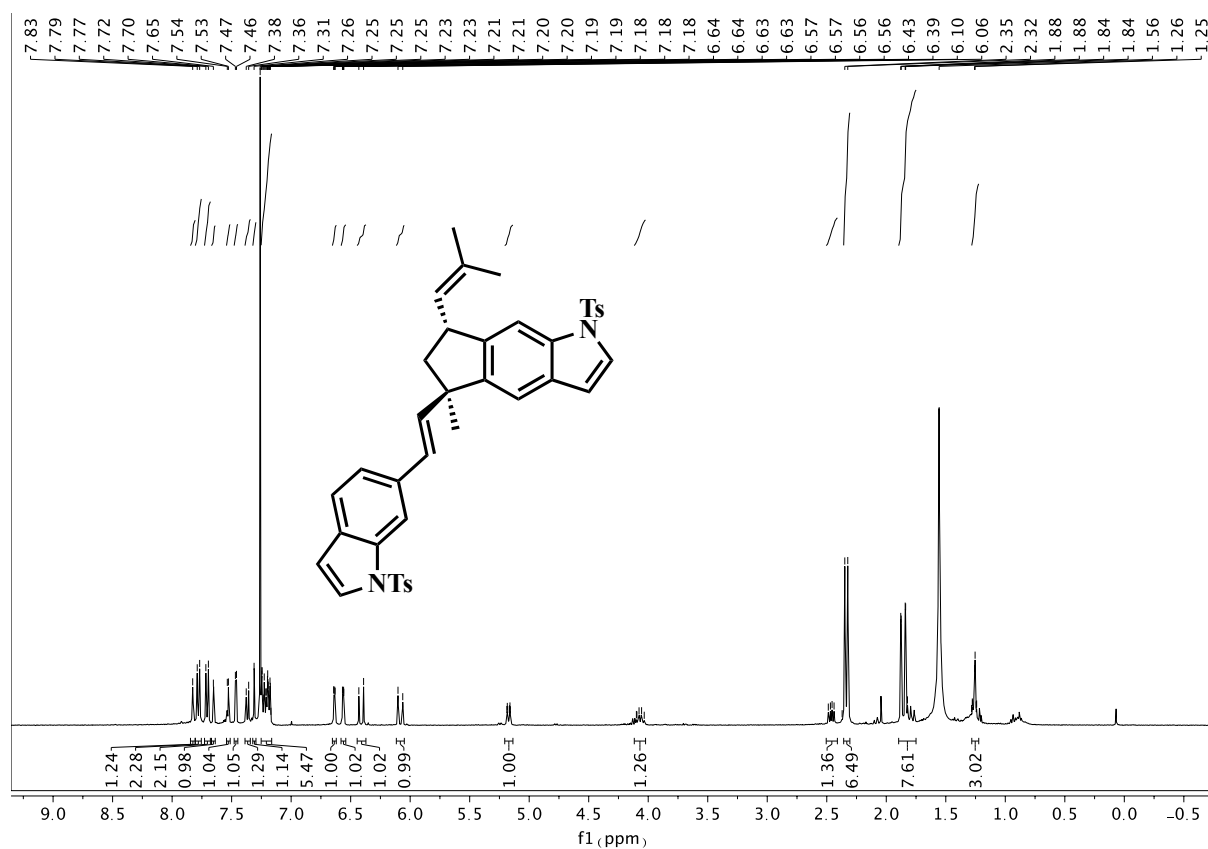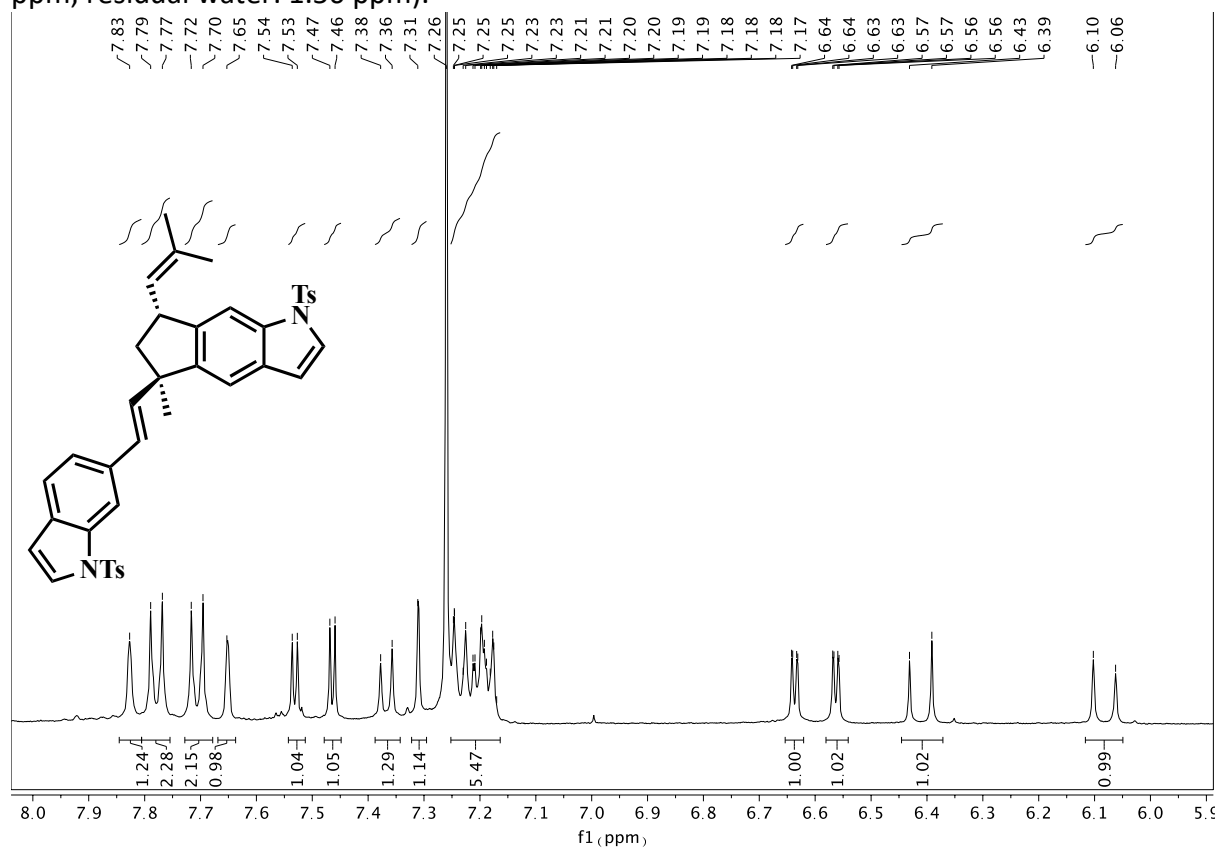

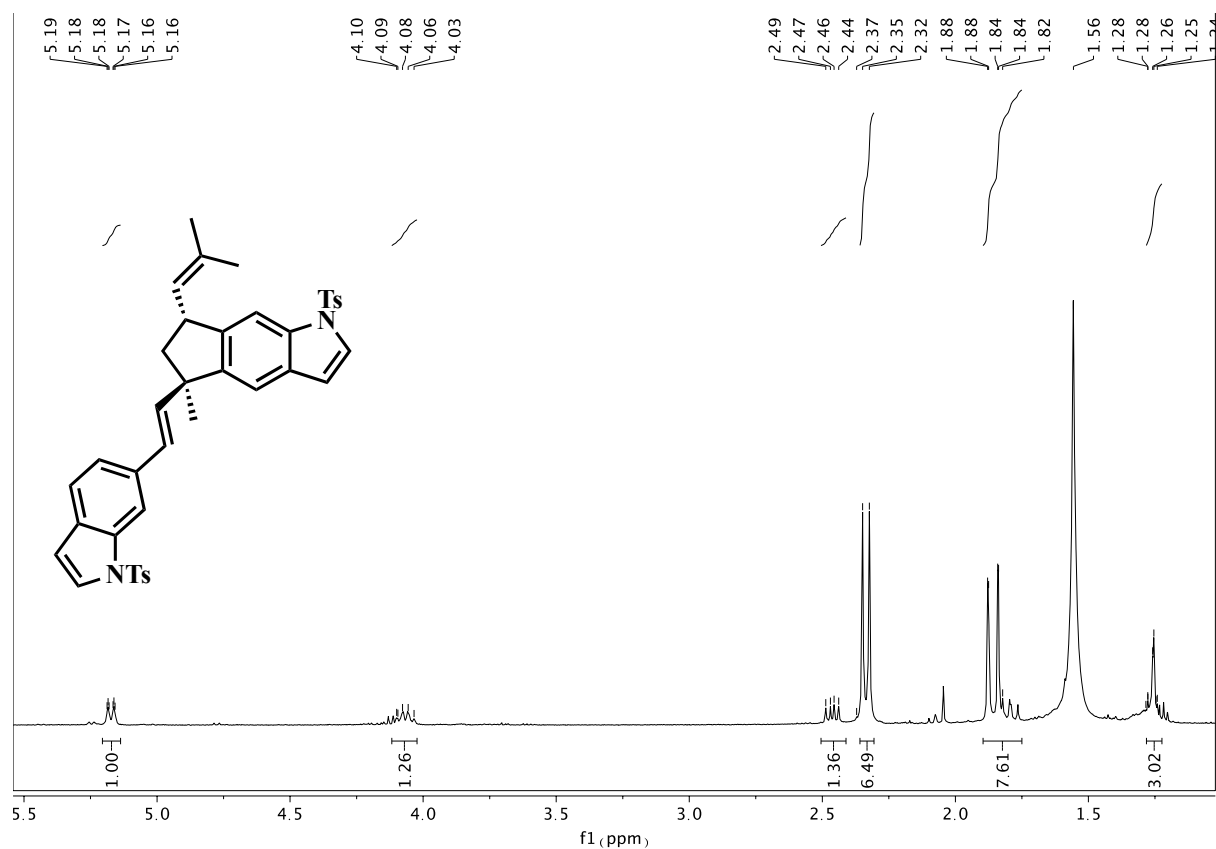

<sup>1</sup>H NMR (400 MHz, CDCl<sub>3</sub>) Spectrum of (5R,7R)-19a.

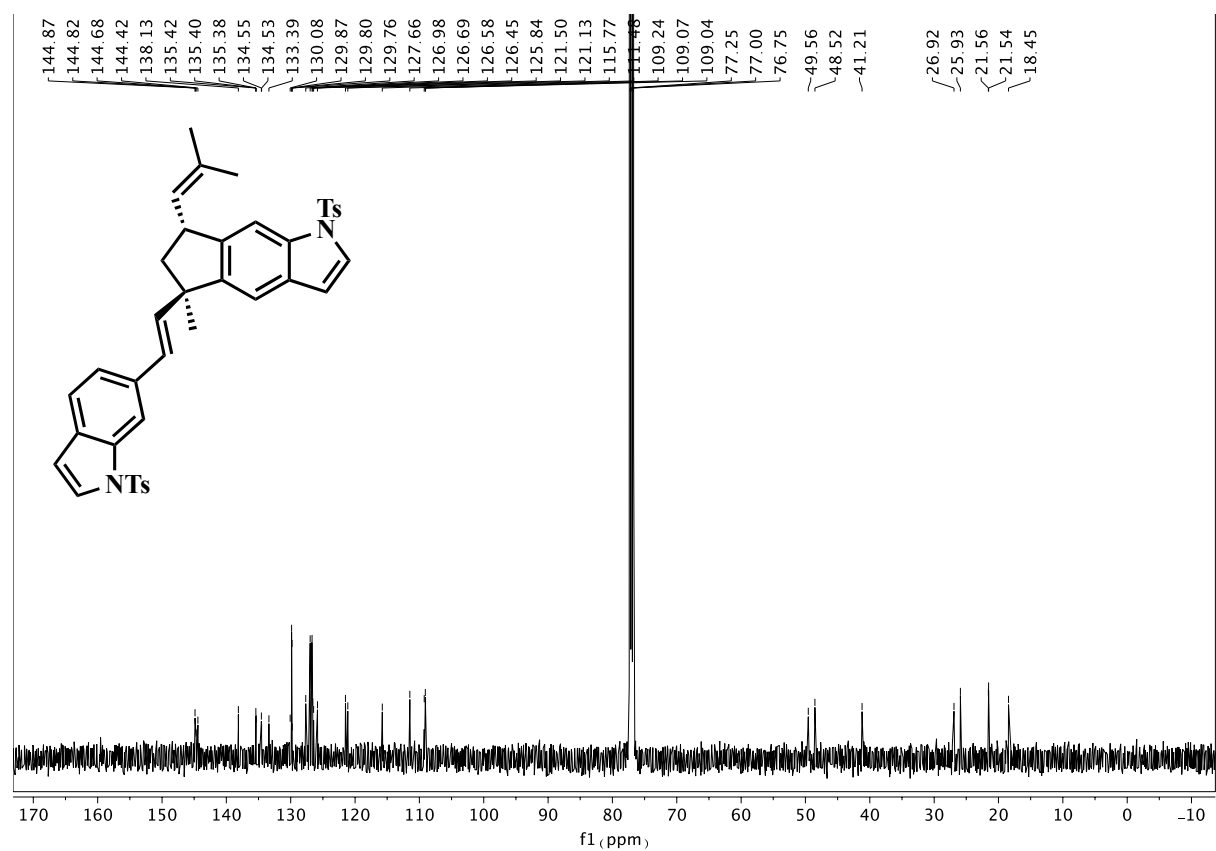

<sup>13</sup>C NMR (126 MHz, CDCl<sub>3</sub>) Spectrum of (5R,7R)-19a.

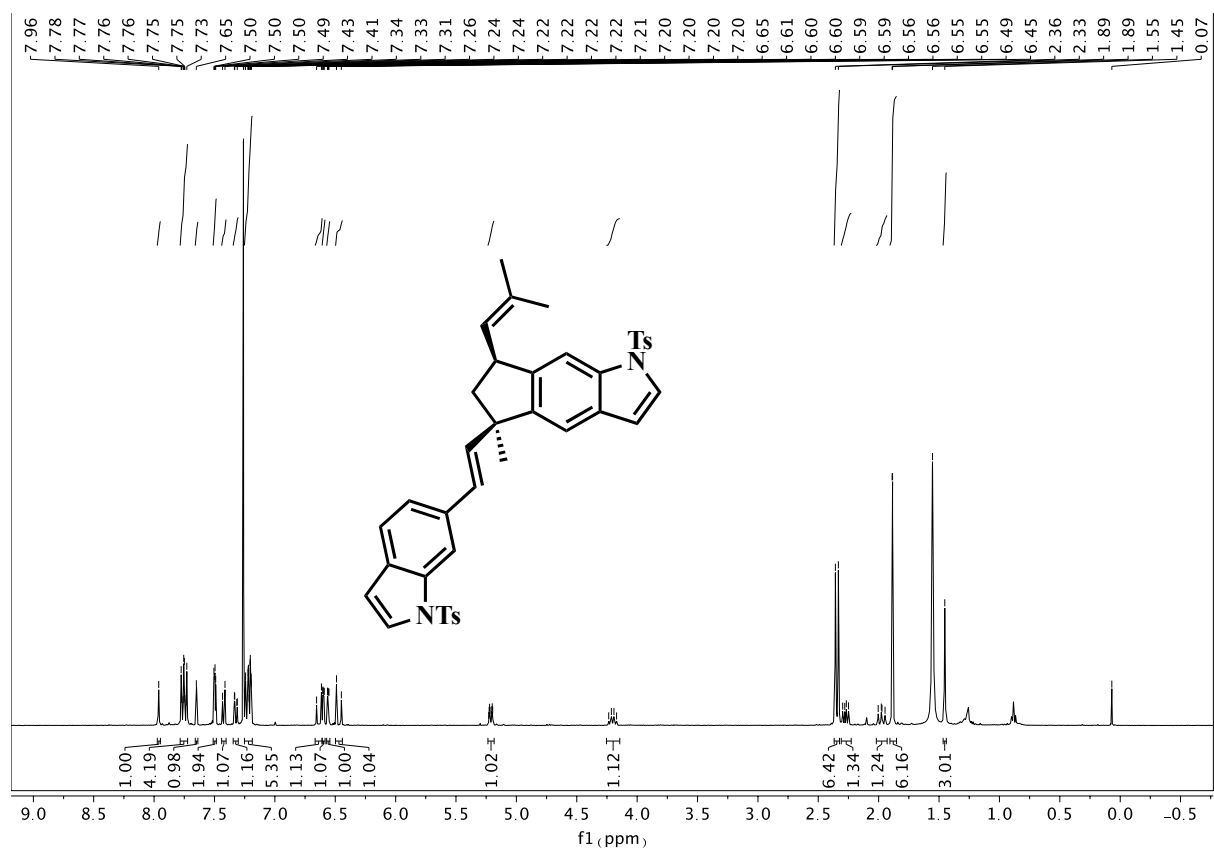

<sup>1</sup>H NMR (400 MHz, CDCl<sub>3</sub>) Spectrum of (5R,7S)-**19b**. (residual hexanes grease: 1.26 and 0.8 ppm; residual water: 1.56 ppm).

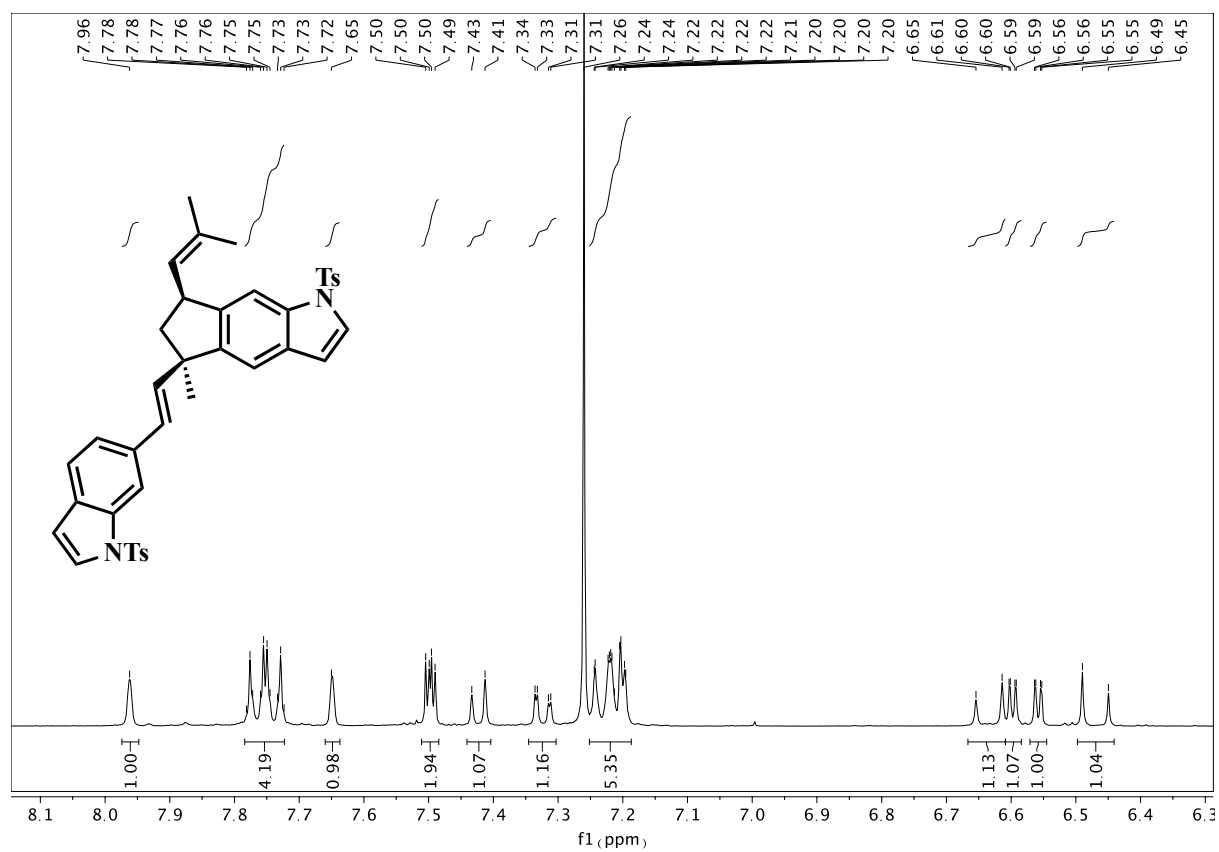

<sup>1</sup>H NMR (400 MHz, CDCl<sub>3</sub>) Spectrum of (5R,7S)-**19b**.

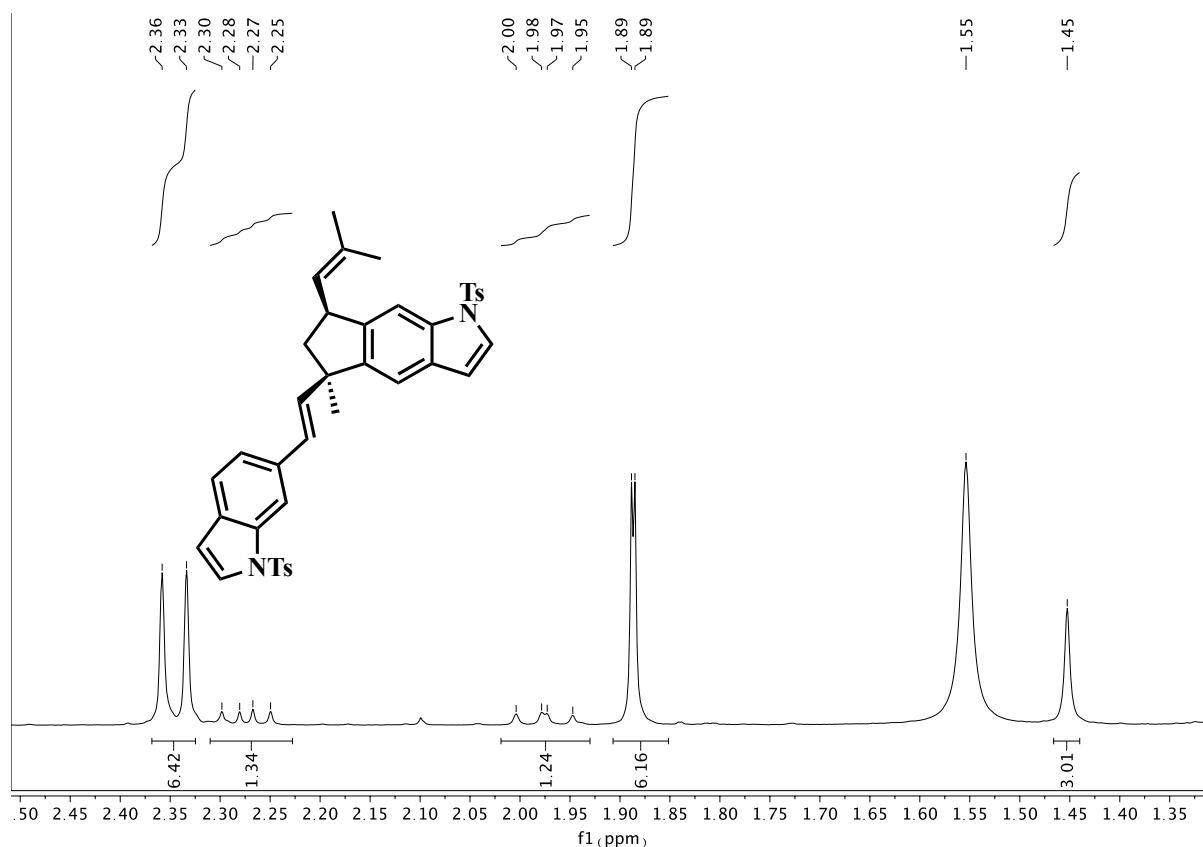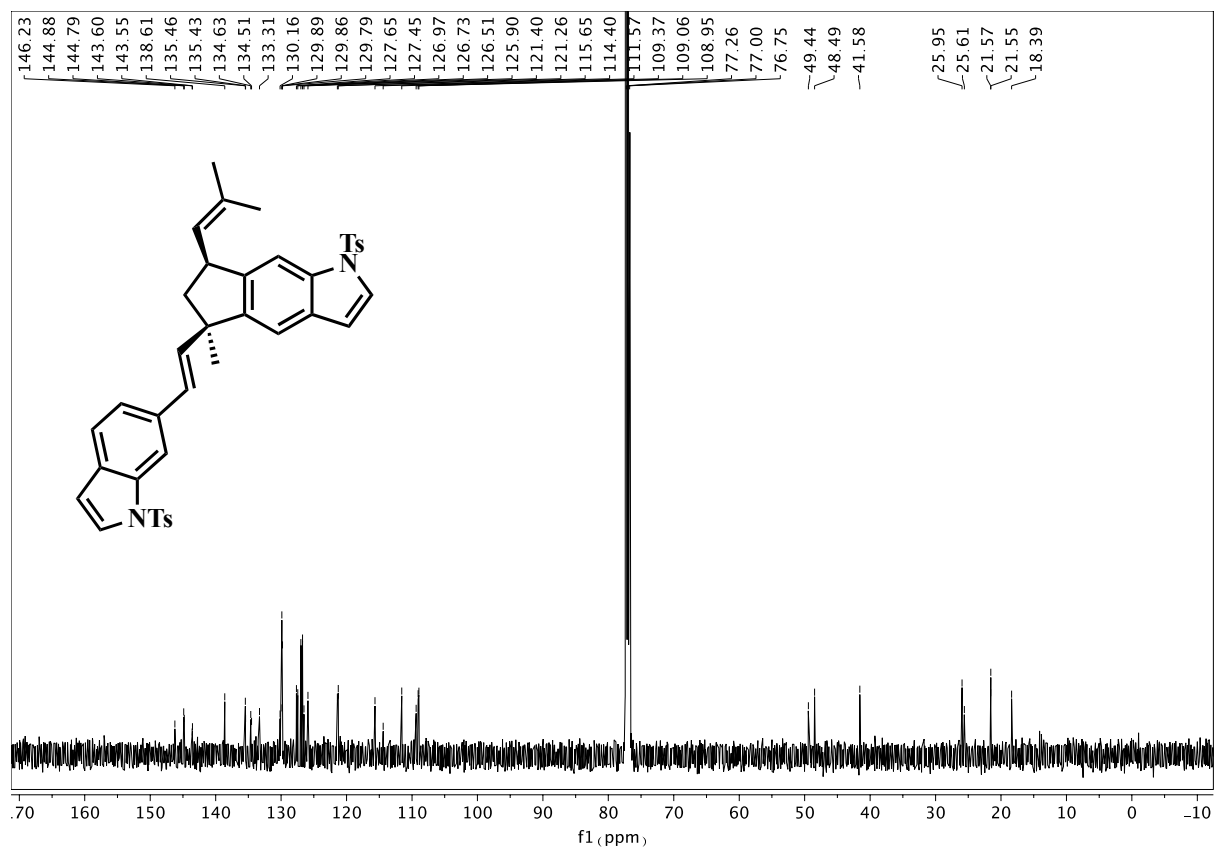

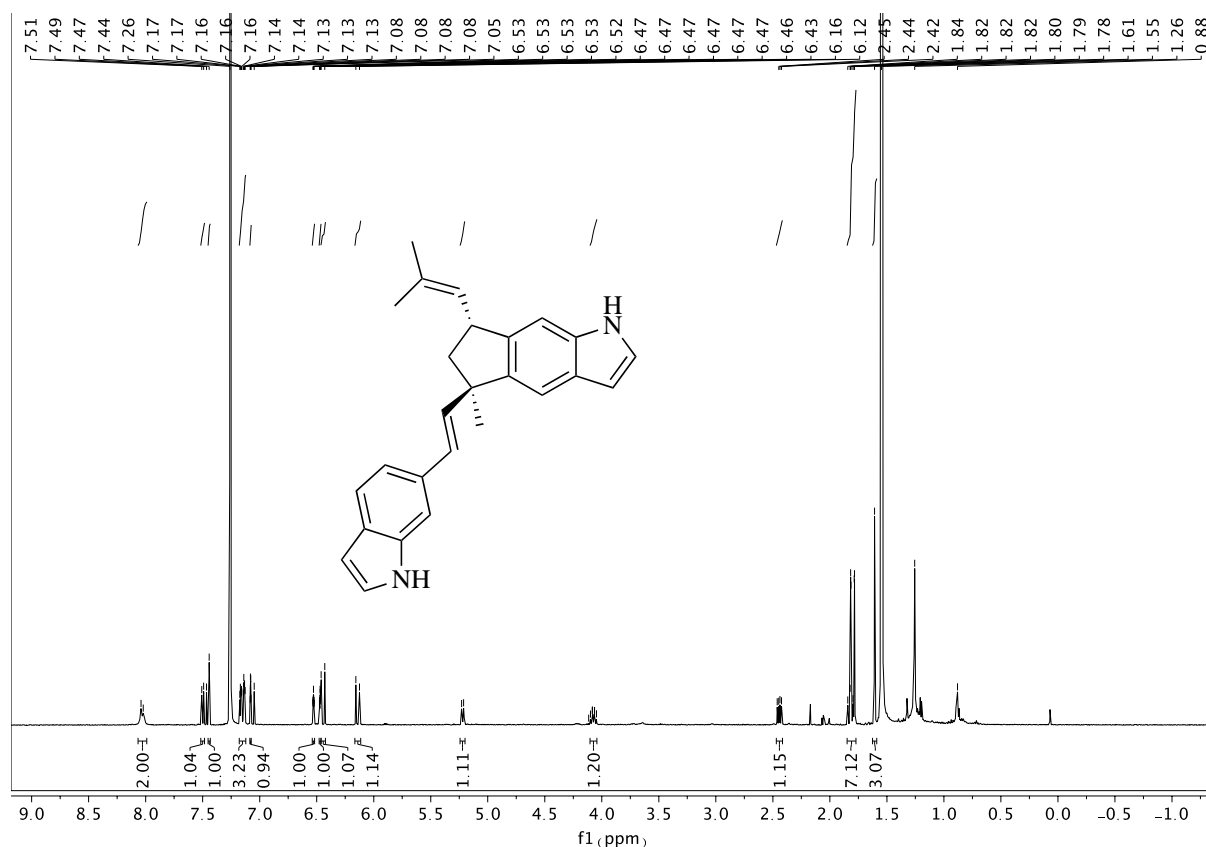

$^1\text{H}$  NMR (500 MHz,  $\text{CDCl}_3$ ) Spectrum of Raputindole A (**1**). (residual hexanes grease: 1.26 and 0.8 ppm; residual water: 1.56 ppm).

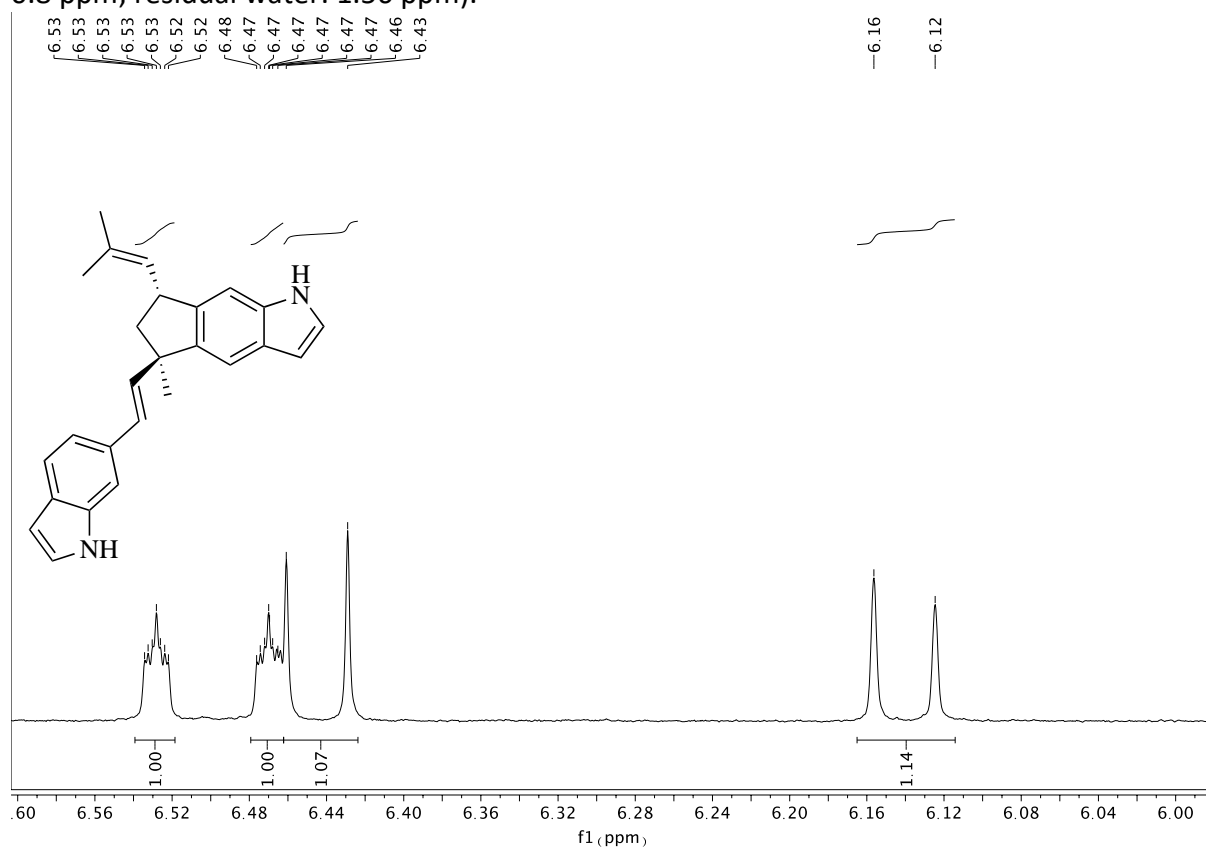

$^1\text{H}$  NMR (500 MHz,  $\text{CDCl}_3$ ) Spectrum of Raputindole A (**1**). (residual hexanes grease: 1.26 and 0.8 ppm; residual  $\text{H}_2\text{O}$ : 1.56 ppm).



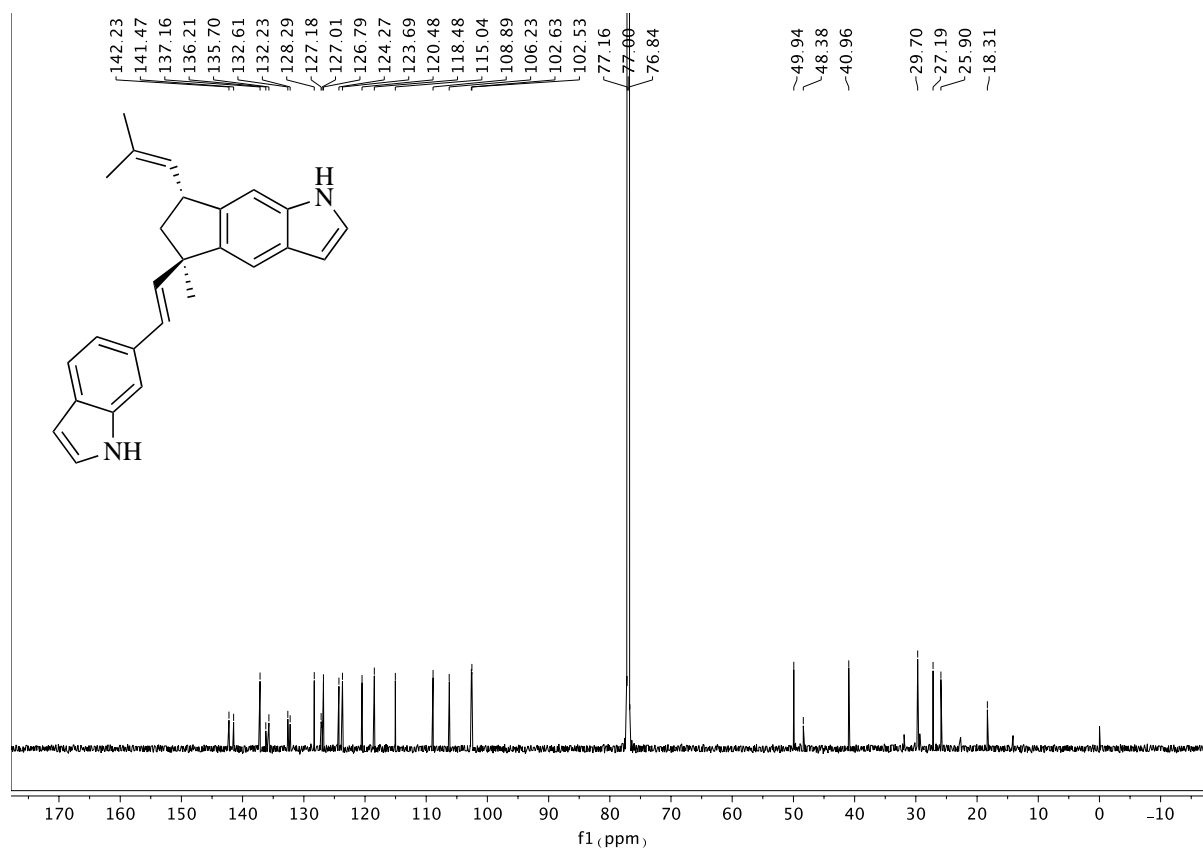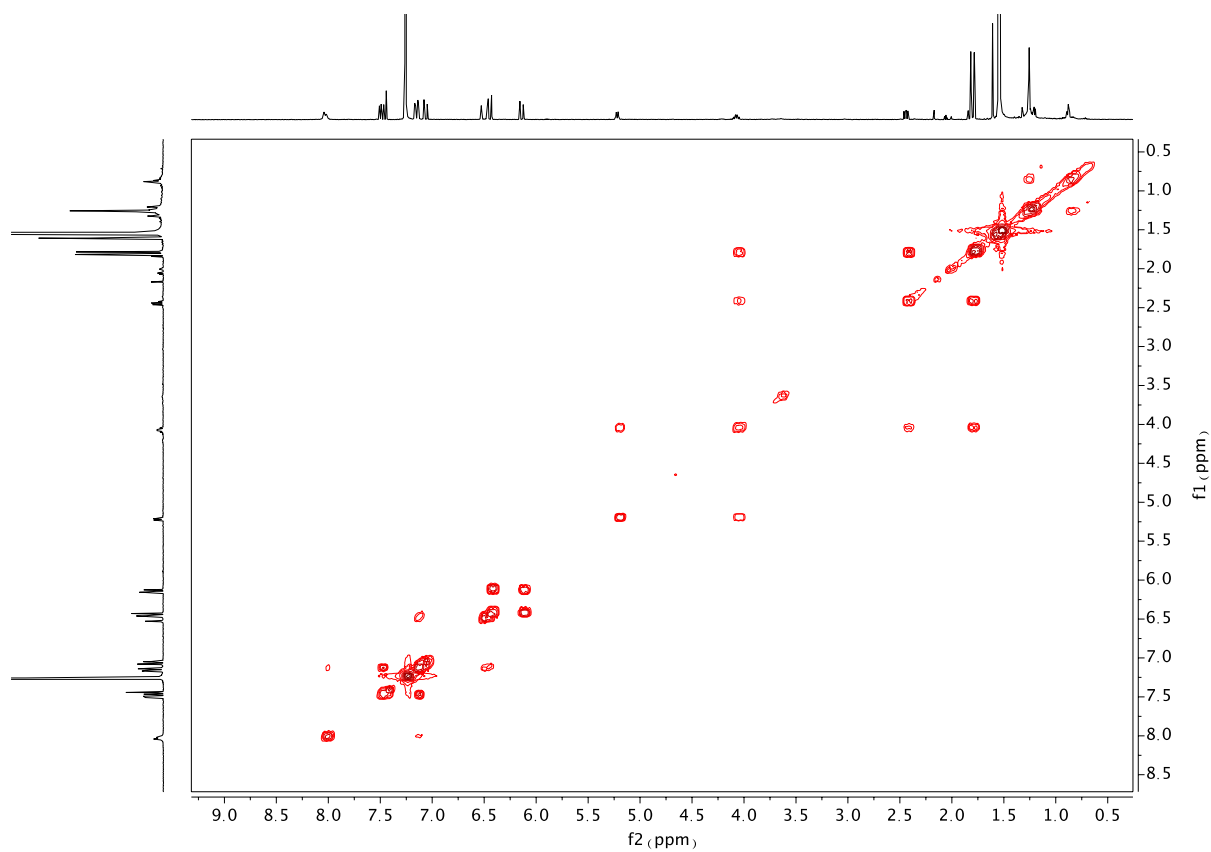

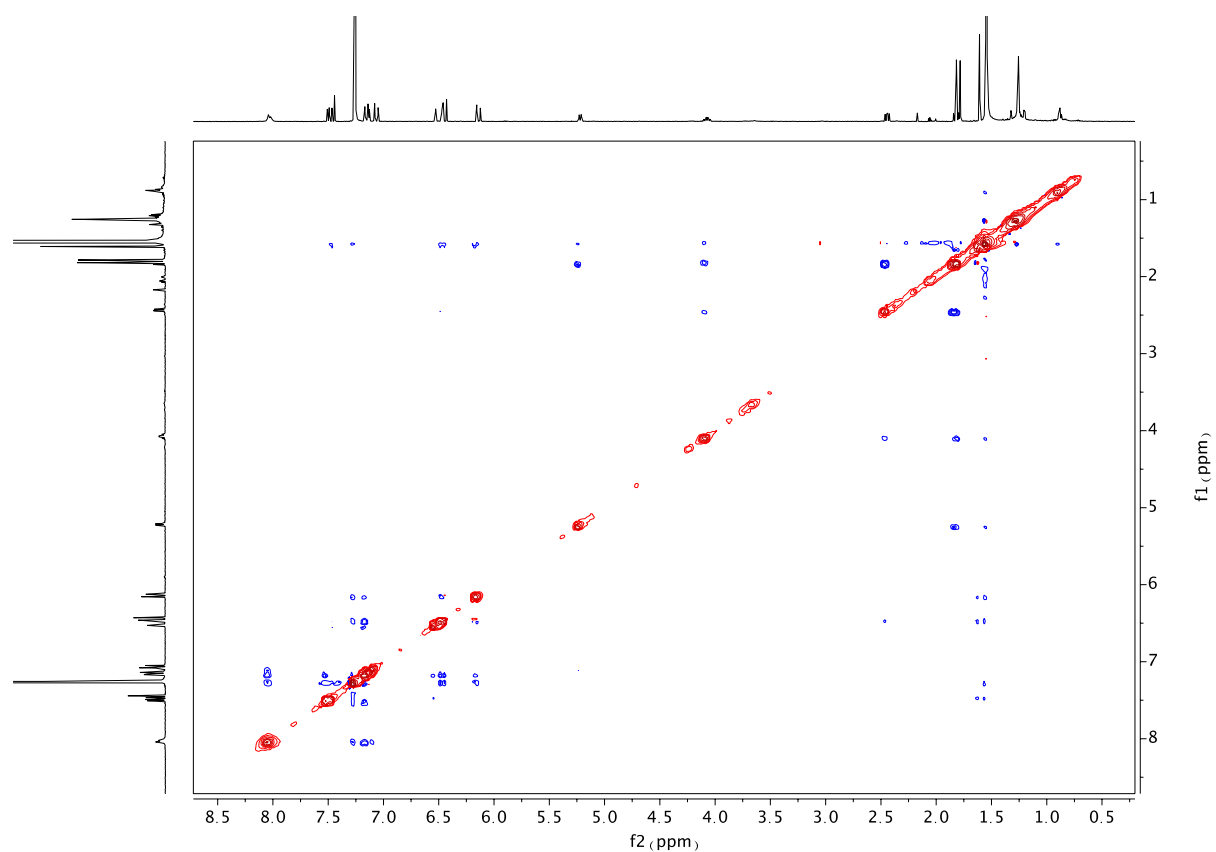

NOESY 2D (500 MHz) of Raputindole A (**1**).

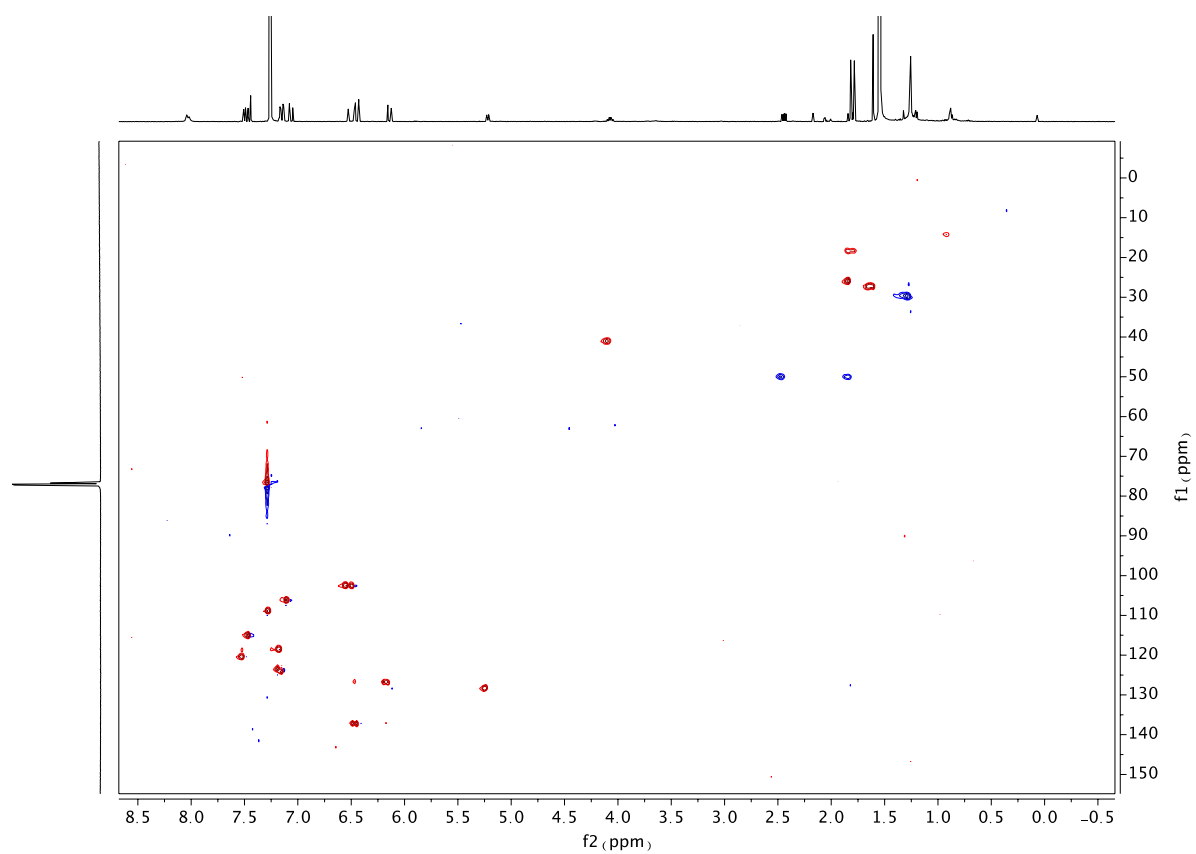

HSQC (500 MHz) of Raputindole A (**1**).

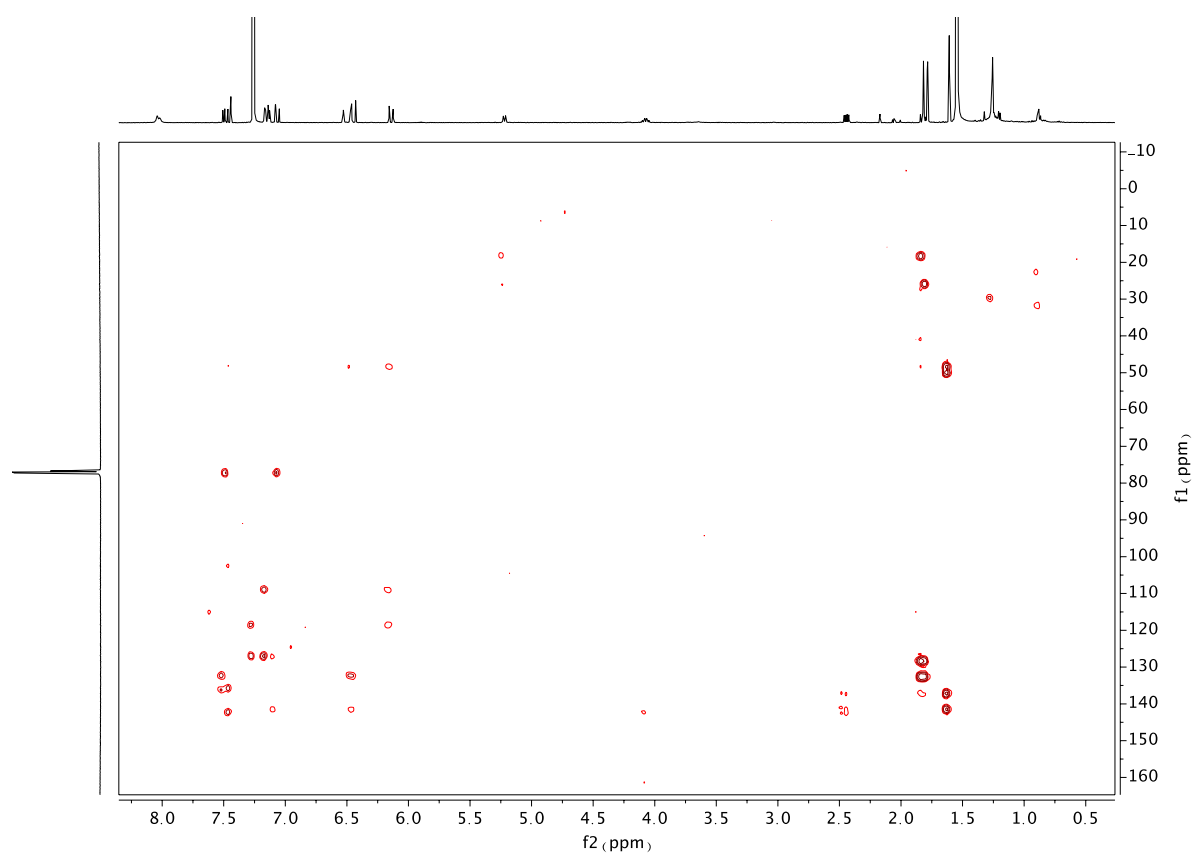

HMBC (500 MHz) of Raputindole A (**1**).
